# Supplementary material
Source: publisher figshare collection journal article supplement (https://frontiersin.figshare.com/ndownloader/files/28733985)
Supplement: Supplementary file 1 [file 28733985]

## Sheet: MASTER
YEAR	AUTHOR	TITLE	YEAR	LOCATION	LATITUDE	LONGITUDE	Surface	Buried	SINGLE SURVEY	ANNUAL +	SEASONAL	MONTHLY-WEEKLY	DAILY	REPEAT ( INCL. UNKNOWN)	SNOW/ICE?	TIDELINE SAMPLING	NATURAL DEBRIS?	Organics in sediment protocols	Organics Removed	Organics Protocols	<2MM	>2MM	NOT SITE SPECIFIC	NOT STATED	OTHER	(MP) OUTSIDE STRANDLINE?	MARINE/FRESHWATER
1997	Madzena and Lasiak	Spatial and temporal variations in beach litter on the Transkei coast of South Africa	1997	Coffee Bay, South Africa	-31.985	29.1492	1				1	1		1							1						M
1997	Madzena and Lasiak	Spatial and temporal variations in beach litter on the Transkei coast of South Africa	1997	Umtata Mouth, South Africa	-31.9495	29.1858	1				1	1		1							1						M
1997	Madzena and Lasiak	Spatial and temporal variations in beach litter on the Transkei coast of South Africa	1997	Mdumbi, South Africa	-31.9323	29.2151	1				1	1		1							1						M
1997	Madzena and Lasiak	Spatial and temporal variations in beach litter on the Transkei coast of South Africa	1997	Mngazi, South Africa	-31.6764	29.4551	1				1	1		1							1						M
1997	Madzena and Lasiak	Spatial and temporal variations in beach litter on the Transkei coast of South Africa	1997	Second Beach, South Africa	-31.6495	29.5187	1				1	1		1							1						M
1997	Madzena and Lasiak	Spatial and temporal variations in beach litter on the Transkei coast of South Africa	1997	Agate Terrace, South Africa	-31.6179	29.5595	1				1	1		1							1						M
2017	Imhof et al.	Spatial and temporal variation of macro-, meso- and microplastic abundance on a remote coral island of the Maldives, Indian Ocean	2017	Maldives	5.41806	73.3544	1	1					1	1		1	1	1			1						M
2013	Heo et al.	Ditribution of small plastic debris in cross-section and high strandline on Heungnam Beach, South Korea	2013	South Korea	34.9604	128.715		1	1							1		1			1						M
2019	Bancin et al	Two-dimensional distribution and abundance of micro- and mesoplastic pollution in the surface sediment of Xialiao Beach, New Taipei City, Taiwan	2019	Xialiao Beach, Taiwan	25.2182	121.652		1	1								1	1	1		1						M
2014	Jang et al	Sources of Plastic Marine Debris on Beaches of Korea: More from the Ocean than the Land	2014	Tae An, South Korea	36.7458	126.298	1		1							1					1						M
2014	Jang et al	Sources of Plastic Marine Debris on Beaches of Korea: More from the Ocean than the Land	2014	Shin An, South Korea	34.8251	126.099	1		1							1					1						M
2014	Jang et al	Sources of Plastic Marine Debris on Beaches of Korea: More from the Ocean than the Land	2014	Go Heung, South Korea	34.6111	127.285	1		1							1					1						M
2014	Jang et al	Sources of Plastic Marine Debris on Beaches of Korea: More from the Ocean than the Land	2014	Yeo Su, South Korea	34.7604	127.662	1		1							1					1						M
2014	Jang et al	Sources of Plastic Marine Debris on Beaches of Korea: More from the Ocean than the Land	2014	Ul Jin, South Korea	36.9972	129.403	1		1							1					1						M
2014	Jang et al	Sources of Plastic Marine Debris on Beaches of Korea: More from the Ocean than the Land	2014	Gang Reung, South Korea	37.7239	128.853	1		1							1					1						M
2013	Van Cauwenberghe et al	Assessment of marine debris on the Belgian continental shelf	2013	De Panne, Belgium	51.1033	2.58866	1	1			0.5			1		1					1						M
2013	Van Cauwenberghe et al	Assessment of marine debris on the Belgian continental shelf	2013	Oostduinkerke, Belgium	51.1358	2.67598	1	1			0.5			1		1					1						M
2013	Van Cauwenberghe et al	Assessment of marine debris on the Belgian continental shelf	2013	De Haan, Belgium	51.2664	3.00054	1	1			0.5			1		1					1						M
2013	Van Cauwenberghe et al	Assessment of marine debris on the Belgian continental shelf	2013	Zwin, Belgium	51.3671	3.3616	1	1			0.5			1		1					1						M
2003	Kusui and Noda	International survey on the distribution of stranded and buried litter on beaches along the Sea of Japan	2003	Pograchiny Bay, Popov Island, Russia	42.9511	131.739	1	1	1							1					1						M
2003	Kusui and Noda	International survey on the distribution of stranded and buried litter on beaches along the Sea of Japan	2003	Engelima Bay, Usri Gulf, Russia	42.984	131.783	1	1	1							1					1						M
2003	Kusui and Noda	International survey on the distribution of stranded and buried litter on beaches along the Sea of Japan	2003	Andrei Bay, Russia	47.919	139.397	1	1	1							1					1						M
2003	Kusui and Noda	International survey on the distribution of stranded and buried litter on beaches along the Sea of Japan	2003	Muchke Bay, Russia	49.4194	140.429	1	1	1							1					1						M
2003	Kusui and Noda	International survey on the distribution of stranded and buried litter on beaches along the Sea of Japan	2003	Tukotan Cape, Russia	50.0176	142.15	1	1	1							1					1						M
2003	Kusui and Noda	International survey on the distribution of stranded and buried litter on beaches along the Sea of Japan	2003	Lopatina Cape, Russia	46.6005	141.811	1	1	1							1					1						M
2003	Kusui and Noda	International survey on the distribution of stranded and buried litter on beaches along the Sea of Japan	2003	Sonya Small Bay, Russia	46.4313	141.847	1	1	1							1					1						M
2003	Kusui and Noda	International survey on the distribution of stranded and buried litter on beaches along the Sea of Japan	2003	Krilyon Cape, Russia	45.896	142.081	1	1	1							1					1						M
2003	Kusui and Noda	International survey on the distribution of stranded and buried litter on beaches along the Sea of Japan	2003	Niinohama, Hioki-Mahi, Japan	34.409	131.112	1	1	1							1					1						M
2003	Kusui and Noda	International survey on the distribution of stranded and buried litter on beaches along the Sea of Japan	2003	Kunihiki Coast, Taki-Machi, Japan	35.1956	132.445	1	1	1							1					1						M
2003	Kusui and Noda	International survey on the distribution of stranded and buried litter on beaches along the Sea of Japan	2003	Uradome Coast, Iwami-Machi, Japan	35.5905	134.326	1	1	1							1					1						M
2003	Kusui and Noda	International survey on the distribution of stranded and buried litter on beaches along the Sea of Japan	2003	Ashiya, Hamasaka-Mahi, Japan	35.6285	134.447	1	1	1							1					1						M
2003	Kusui and Noda	International survey on the distribution of stranded and buried litter on beaches along the Sea of Japan	2003	Hamaji, Mikuni-Machi, Japan	36.2506	136.167	1	1	1							1					1						M
2003	Kusui and Noda	International survey on the distribution of stranded and buried litter on beaches along the Sea of Japan	2003	Shioya, Kaga, Japan	36.2991	136.249	1	1	1							1					1						M
2003	Kusui and Noda	International survey on the distribution of stranded and buried litter on beaches along the Sea of Japan	2003	Hakui, Japan	37.1482	136.713	1	1	1							1					1						M
2003	Kusui and Noda	International survey on the distribution of stranded and buried litter on beaches along the Sea of Japan	2003	Yotsugoyahama, Maki-machi, Japan	37.8482	138.885	1	1	1							1					1						M
2003	Kusui and Noda	International survey on the distribution of stranded and buried litter on beaches along the Sea of Japan	2003	Hamanaka, Sakata, Japan	38.8317	139.778	1	1	1							1					1						M
2003	Kusui and Noda	International survey on the distribution of stranded and buried litter on beaches along the Sea of Japan	2003	Nishime-machi, Japan	39.3713	140.01	1	1	1							1					1						M
2003	Kusui and Noda	International survey on the distribution of stranded and buried litter on beaches along the Sea of Japan	2003	Dekishima Kizukuri-machi, Japan	40.8479	140.278	1	1	1							1					1						M
2003	Kusui and Noda	International survey on the distribution of stranded and buried litter on beaches along the Sea of Japan	2003	Kuntanihama, Kasumi-Machi, Japan	35.6394	134.622	1	1	1							1					1						M
2003	Kusui and Noda	International survey on the distribution of stranded and buried litter on beaches along the Sea of Japan	2003	Kotobikihama, Amino-Machi, Japan	35.706	135.056	1	1	1							1					1						M
2003	Kusui and Noda	International survey on the distribution of stranded and buried litter on beaches along the Sea of Japan	2003	Matsudaehama, Takaoka, Japan	36.8226	137.027	1	1	1							1					1						M
2003	Kusui and Noda	International survey on the distribution of stranded and buried litter on beaches along the Sea of Japan	2003	Iwasehama, Toyama, Japan	36.7645	137.236	1	1	1							1					1						M
2003	Kusui and Noda	International survey on the distribution of stranded and buried litter on beaches along the Sea of Japan	2003	Miyamazaki, Ashi-machi, Japan	36.9746	137.591	1	1	1							1					1						M
2003	Kusui and Noda	International survey on the distribution of stranded and buried litter on beaches along the Sea of Japan	2003	Shimao-Matudaehama, Takaoka, Japan	36.8309	137.014	1	1	1							1					1						M
2018	Miller et al	Marine debris trends: 30 years of change on Ventura County and Channel Island beaches	2018	Shunk Point, Santa Rosa Island, California, US	33.9834	-119.986	1	1			0.5			1							1						M
2018	Miller et al	Marine debris trends: 30 years of change on Ventura County and Channel Island beaches	2018	Cluster Point, Santa Rosa Island, California, US	33.9266	-120.179	1	1	1												1						M
2018	Miller et al	Marine debris trends: 30 years of change on Ventura County and Channel Island beaches	2018	Sandy Point, Santa Rosa Island, California, US	34.0076	-120.239	1	1			0.5			1							1						M
2018	Miller et al	Marine debris trends: 30 years of change on Ventura County and Channel Island beaches	2018	Arlington, Santa Rosa Island, California, US	34.0068	-120.181	1	1			0.5			1							1						M
2018	Miller et al	Marine debris trends: 30 years of change on Ventura County and Channel Island beaches	2018	Forney's, Santa Cruz Island, California, US	34.0602	-119.921	1	1	1												1						M
2018	Miller et al	Marine debris trends: 30 years of change on Ventura County and Channel Island beaches	2018	Christy, Santa Cruz Island, California, US	34.0307	-119.876	1	1	1												1						M
2018	Miller et al	Marine debris trends: 30 years of change on Ventura County and Channel Island beaches	2018	Sauces, Santa Cruz Island, California, US	34.015	-119.882	1	1	1												1						M
2018	Miller et al	Marine debris trends: 30 years of change on Ventura County and Channel Island beaches	2018	Ormond Beach, California, US	34.1187	-119.158	1	1			0.5			1							1						M
2018	Miller et al	Marine debris trends: 30 years of change on Ventura County and Channel Island beaches	2018	Hueneme Beach, California, US	34.1407	-119.192	1	1			0.5			1							1						M
2018	Miller et al	Marine debris trends: 30 years of change on Ventura County and Channel Island beaches	2018	5th Street Beach, California, US	34.1983	-119.249	1	1			0.5			1							1						M
2018	Miller et al	Marine debris trends: 30 years of change on Ventura County and Channel Island beaches	2018	Santa Clara Rivermouth, California, US	34.2268	-119.262	1	1			0.5			1							1						M
2018	Miller et al	Marine debris trends: 30 years of change on Ventura County and Channel Island beaches	2018	Ventura State Beach, California, US	34.2751	-119.29	1	1			0.5			1							1						M
2018	Miller et al	Marine debris trends: 30 years of change on Ventura County and Channel Island beaches	2018	Ventura Rivermouth, California, US	34.2736	-119.305	1	1			0.5			1							1						M
2012	Ribic, Sheavly & Klavitter	Baseline for beached marine debris on Sand Island, Midway Atoll	2012	Sand Island, Midway Atoll	28.2082	-177.374	1			1	1	1		1							1						M
2017	Becherucci et al	Marine debris in beaches of the Southwestern Atlantic: An assessment of their abundance and mass at different spatial scales in northern coastal Argentina	2017	Mar del Plata, Argentina	-38.0051	-57.5398	1		1												1						M
2017	Becherucci et al	Marine debris in beaches of the Southwestern Atlantic: An assessment of their abundance and mass at different spatial scales in northern coastal Argentina	2017	Mar Chiquita, Argentina	-37.7485	-57.4213	1		1												1						M
2017	Becherucci et al	Marine debris in beaches of the Southwestern Atlantic: An assessment of their abundance and mass at different spatial scales in northern coastal Argentina	2017	Faro Querandi, Argentina	-37.4748	-57.1203	1		1												1						M
2017	Becherucci et al	Marine debris in beaches of the Southwestern Atlantic: An assessment of their abundance and mass at different spatial scales in northern coastal Argentina	2017	Villa Gesell, Argentina	-37.2636	-56.9689	1		1												1						M
2013	Lee et al	Relationships among the abundances of plastic debris in different size classes on beaches in South Korea	2013	Myeongsa, South Korea	34.7264	128.603	1	1			1			1		1		1	1		1						M
2013	Lee et al	Relationships among the abundances of plastic debris in different size classes on beaches in South Korea	2013	Wahyeon, South Korea	34.8134	128.707		1			1			1		1		1	1		1						M
2013	Lee et al	Relationships among the abundances of plastic debris in different size classes on beaches in South Korea	2013	Deokpo, South Korea	34.9118	128.711		1	1							1		1	1		1						M
2013	Lee et al	Relationships among the abundances of plastic debris in different size classes on beaches in South Korea	2013	Heungnam, South Korea	34.9601	128.715		1			1			1		1		1	1		1						M
2013	Lee et al	Relationships among the abundances of plastic debris in different size classes on beaches in South Korea	2013	Guyeong, South Korea	35.0312	128.699		1	1							1		1	1		1						M
2013	Lee et al	Relationships among the abundances of plastic debris in different size classes on beaches in South Korea	2013	Jinwoo, South Korea	35.0656	128.885		1	1							1		1	1		1						M
2013	Jayasiri, Purushothaman & Vennila	Plastic litter accumulation on high-water strandline of urban beaches in Mumbai, India	2013	Dadar Beach, Mumbai, India	19.0367	72.8383	1					1		1		1					1						M
2013	Jayasiri, Purushothaman & Vennila	Plastic litter accumulation on high-water strandline of urban beaches in Mumbai, India	2013	Juju Beach, Mumbai, India	19.1046	72.824	1					1		1		1					1						M
2013	Jayasiri, Purushothaman & Vennila	Plastic litter accumulation on high-water strandline of urban beaches in Mumbai, India	2013	Versova, Mumbai, India	19.1402	72.8028	1					1		1		1					1						M
2013	Jayasiri, Purushothaman & Vennila	Plastic litter accumulation on high-water strandline of urban beaches in Mumbai, India	2013	Aksa, Mumbai, India	19.1814	72.7957	1					1		1		1					1						M
2013	Antunes et al	Resin pellets from beaches of the Portuguese coast and adsorbed persistent organic pollutants	2013	Matosinhos, Portugal	39.3158	-8.52077	1		1							1					1						M
2013	Antunes et al	Resin pellets from beaches of the Portuguese coast and adsorbed persistent organic pollutants	2013	Espinho, Portugal	41.0067	-8.64417	1		1							1					1						M
2013	Antunes et al	Resin pellets from beaches of the Portuguese coast and adsorbed persistent organic pollutants	2013	Mira, Portugal	40.4558	-8.80167	1		1							1					1						M
2013	Antunes et al	Resin pellets from beaches of the Portuguese coast and adsorbed persistent organic pollutants	2013	Vieira de Leiria, Portugal	39.8739	-8.96944	1		1							1					1						M
2013	Antunes et al	Resin pellets from beaches of the Portuguese coast and adsorbed persistent organic pollutants	2013	Paredes de Vitoria, Portugal	39.7028	-9.04972	1		1							1					1						M
2013	Antunes et al	Resin pellets from beaches of the Portuguese coast and adsorbed persistent organic pollutants	2013	Peniche, Portugal	39.3608	-9.36778	1		1							1					1						M
2013	Antunes et al	Resin pellets from beaches of the Portuguese coast and adsorbed persistent organic pollutants	2013	Cresmina, Portugal	38.7244	-9.47667	1		1							1					1						M
2013	Antunes et al	Resin pellets from beaches of the Portuguese coast and adsorbed persistent organic pollutants	2013	Fonte da Telha, Portugal	38.5678	-9.19389	1		1							1					1						M
2013	Antunes et al	Resin pellets from beaches of the Portuguese coast and adsorbed persistent organic pollutants	2013	Sines, Portugal	37.9231	8.80556	1		1							1					1						M
2013	Antunes et al	Resin pellets from beaches of the Portuguese coast and adsorbed persistent organic pollutants	2013	Bordeira, Portugal	37.1969	8.90333	1		1							1					1						M
2017	Portman and Brennan	Marine litter from beach-based sources: Case study of an Eastern Mediterranean coastal town	2017	Jisr-Az-Zarqa, Israel	32.5381	34.9015	1				1			1							1						M
2014	Leite et al	Influence of proximity to an urban center in the pattern of contamination by marine debris	2014	Porto da Barra, Bahia, Brazil	-13.0033	-38.5329	1		1												1						M
2014	Leite et al	Influence of proximity to an urban center in the pattern of contamination by marine debris	2014	Ondina, Bahia, Brazil	-13.0112	-38.5107	1		1												1						M
2014	Leite et al	Influence of proximity to an urban center in the pattern of contamination by marine debris	2014	Jardim de Ala, Bahia, Brazil	-13.0015	-38.4493	1		1												1						M
2014	Leite et al	Influence of proximity to an urban center in the pattern of contamination by marine debris	2014	Praia dos Artistas, Bahia, Brazil	-12.9762	-38.4177	1		1												1						M
2014	Leite et al	Influence of proximity to an urban center in the pattern of contamination by marine debris	2014	Jaguaribe, Bahia, Brazil	-12.9601	-38.3937	1		1												1						M
2014	Leite et al	Influence of proximity to an urban center in the pattern of contamination by marine debris	2014	Aleluia, Bahia, Brazil	-12.9423	-38.332	1		1												1						M
2014	Leite et al	Influence of proximity to an urban center in the pattern of contamination by marine debris	2014	Genipabu, Bahia, Brazil	-12.6815	-38.0974	1		1												1						M
2014	Leite et al	Influence of proximity to an urban center in the pattern of contamination by marine debris	2014	Itacimirim, Bahia, Brazil	-12.6226	-38.0455	1		1												1						M
2014	Leite et al	Influence of proximity to an urban center in the pattern of contamination by marine debris	2014	Praia do Forte, Bahia, Brazil	-12.5779	-38.0026	1		1												1						M
2018	Hidalgo-Ruz et al	Spatio-temporal variation of anthropogenic marine debris on Chilean beaches	2018	Chile	-35.6887	-71.921	1				0.5			1							1						M
2019	Honorato-Zimmer et al	Inter-hemispherical shoreline surveys of anthropogenic marine debris - A binational citizen science project with schoolchildren	2019	Chile & Germany	-35.6887	-71.921	1		1												1						M
2016	Poeta et al	Beach litter occurrence in sandy littorals: The potential role of urban areas, rivers and beach users in central Italy	2016	Riva dei Tarquini, Lazio, Italy	42.29	11.6399	1		1												1						M
2016	Poeta et al	Beach litter occurrence in sandy littorals: The potential role of urban areas, rivers and beach users in central Italy	2016	Torre Flavia, Lazio, Italy	41.9628	12.0446	1		1												1						M
2016	Poeta et al	Beach litter occurrence in sandy littorals: The potential role of urban areas, rivers and beach users in central Italy	2016	Palidoro, Lazio, Italy	41.9093	12.1483	1		1												1						M
2016	Poeta et al	Beach litter occurrence in sandy littorals: The potential role of urban areas, rivers and beach users in central Italy	2016	Fiumicino-Focene, Lazio, Italy	41.8125	12.2121	1		1												1						M
2016	Poeta et al	Beach litter occurrence in sandy littorals: The potential role of urban areas, rivers and beach users in central Italy	2016	Torre Astura, Lazio, Italy	41.4181	12.7875	1		1												1						M
1997	Williams & Simmons	Estuarine litter at the river/beach interface in the Bristol Channel, United Kingdom	1997	West Aberthaw, Wales	51.392	-3.38919	1		1							1					1						M
1997	Williams & Simmons	Estuarine litter at the river/beach interface in the Bristol Channel, United Kingdom	1997	Llantwit Major, Wales	51.3965	-3.50164	1		1							1					1						M
1997	Williams & Simmons	Estuarine litter at the river/beach interface in the Bristol Channel, United Kingdom	1997	Southerndown, Wales	51.4463	-3.60525	1		1							1					1						M
1997	Williams & Simmons	Estuarine litter at the river/beach interface in the Bristol Channel, United Kingdom	1997	Merthyr Mawr, Wales	51.4752	-3.64658	1		1							1					1						M
1997	Williams & Simmons	Estuarine litter at the river/beach interface in the Bristol Channel, United Kingdom	1997	Lee Bay, England	51.1985	-4.17925	1		1							1					1						M
1997	Williams & Simmons	Estuarine litter at the river/beach interface in the Bristol Channel, United Kingdom	1997	Lynmouth, England	51.2317	-3.83184	1		1							1					1						M
1997	Williams & Simmons	Estuarine litter at the river/beach interface in the Bristol Channel, United Kingdom	1997	Porlock, England	51.2178	-3.62455	1		1							1					1						M
1997	Williams & Simmons	Estuarine litter at the river/beach interface in the Bristol Channel, United Kingdom	1997	Minehead, England	51.2074	-3.46144	1		1							1					1						M
1997	Williams & Simmons	Estuarine litter at the river/beach interface in the Bristol Channel, United Kingdom	1997	Dunster, England	51.1923	-3.4269	1		1							1					1						M
1997	Williams & Simmons	Estuarine litter at the river/beach interface in the Bristol Channel, United Kingdom	1997	Blue Anchor Bay, England	51.1821	-3.40191	1		1							1					1						M
1997	Williams & Simmons	Estuarine litter at the river/beach interface in the Bristol Channel, United Kingdom	1997	Watchet, England	51.1818	-3.32919	1		1							1					1						M
1997	Williams & Simmons	Estuarine litter at the river/beach interface in the Bristol Channel, United Kingdom	1997	Doniford, England	51.18	-3.30854	1		1							1					1						M
2017	Pasternak et al	Sources, composition and spatial distribution of marine debris along the Mediterranean coast of Israel	2017	Zikim, Israel	32.3183	34.8779	1			1	1	1		1							1						M
2017	Pasternak et al	Sources, composition and spatial distribution of marine debris along the Mediterranean coast of Israel	2017	Nizanim, Israel	31.745	34.6002	1			1	1	1		1							1						M
2017	Pasternak et al	Sources, composition and spatial distribution of marine debris along the Mediterranean coast of Israel	2017	Michael Maagen, Israel	32.558	34.9073	1			1	1	1		1							1						M
2017	Pasternak et al	Sources, composition and spatial distribution of marine debris along the Mediterranean coast of Israel	2017	Netanya, Israel	32.33	34.848	1			1	1	1		1							1						M
2017	Pasternak et al	Sources, composition and spatial distribution of marine debris along the Mediterranean coast of Israel	2017	Haifa, Israel	32.806	34.9551	1			1	1	1		1							1						M
2017	Pasternak et al	Sources, composition and spatial distribution of marine debris along the Mediterranean coast of Israel	2017	Akko, Israel	32.9167	35.08	1			1	1	1		1							1						M
2017	Pasternak et al	Sources, composition and spatial distribution of marine debris along the Mediterranean coast of Israel	2017	Naharia, Israel	33.0109	35.0884	1			1	1	1		1							1						M
2017	Pasternak et al	Sources, composition and spatial distribution of marine debris along the Mediterranean coast of Israel	2017	Rosh HaNikra, Israel	33.0803	35.1059	1			1	1	1		1							1						M
2019	Krelling and Turra	Influence of oceanographic and meteorological events on the quantity and quality of marine debris along an estuarine gradient	2019	Ponta Oeste, Brazil	-25.5028	-48.3817	1		1							1					1						M
2019	Krelling and Turra	Influence of oceanographic and meteorological events on the quantity and quality of marine debris along an estuarine gradient	2019	Gonzaga, Brazil	-25.5094	-48.3799	1		1							1					1						M
2019	Krelling and Turra	Influence of oceanographic and meteorological events on the quantity and quality of marine debris along an estuarine gradient	2019	Cedro, Brazil	-25.5143	-48.3753	1		1							1					1						M
2019	Krelling and Turra	Influence of oceanographic and meteorological events on the quantity and quality of marine debris along an estuarine gradient	2019	Canto das Pedras, Brazil	-25.5649	-48.3548	1		1							1					1						M
2019	Krelling and Turra	Influence of oceanographic and meteorological events on the quantity and quality of marine debris along an estuarine gradient	2019	CEM, Brazil	-25.5743	-48.3489	1		1							1					1						M
2019	Krelling and Turra	Influence of oceanographic and meteorological events on the quantity and quality of marine debris along an estuarine gradient	2019	Coruja, Brazil	-25.5902	-48.3686	1		1							1					1						M
2019	Krelling and Turra	Influence of oceanographic and meteorological events on the quantity and quality of marine debris along an estuarine gradient	2019	Barrancos, Brazil	-25.6082	-48.3967	1		1							1					1						M
2019	Krelling and Turra	Influence of oceanographic and meteorological events on the quantity and quality of marine debris along an estuarine gradient	2019	Barrancos Sul, Brazil	-25.6128	-48.4026	1		1							1					1						M
2019	Krelling and Turra	Influence of oceanographic and meteorological events on the quantity and quality of marine debris along an estuarine gradient	2019	Guape, Brazil	-25.6193	-48.41	1		1							1					1						M
2018	Krishnakumar et al	A preliminary study on coastal debris in Nallathanni Island, Gulf of Mannar Biosphere Reserve, Southeast coast of India	2018	Nallathanni Island, India	9.10667	78.5789	1		1							1					1						M
2016	Kumar et al	Preliminary study on marine debris pollution along Marina beach, Chennai, India	2016	Marina Beach, Chennai Metroploitan City, India	13.0513	80.2835	1					1		1		1					1						M
1997	Frost and Cullen	Marine debris on northern New South Wales beaches (Australia): Sources and the role of beach usage	1997	New South Wales, Australia	-28.642	153.62	1					1		1							1						M
1997	Frost and Cullen	Marine debris on northern New South Wales beaches (Australia): Sources and the role of beach usage	1997	New South Wales, Australia	-28.8535	153.599	1					1		1							1						M
1997	Frost and Cullen	Marine debris on northern New South Wales beaches (Australia): Sources and the role of beach usage	1997	New South Wales, Australia	-29.0041	153.474	1					1		1							1						M
1997	Frost and Cullen	Marine debris on northern New South Wales beaches (Australia): Sources and the role of beach usage	1997	New South Wales, Australia	-29.2281	153.385	1					1		1							1						M
2015	Duhec et al	Composition and potential origin of marine debris stranded in the Western Indian Ocean on remote Alphonse Island, Seychelles	2015	Alphonse Island, Seychelles	-7.01667	52.7333	1					1		1		1					1						M
2019	Martin et al	Comparing quantity of marine debris to loggerhead sea turtle (Caretta caretta) nesting and non-nesting emergence activity on Jekyll Island, Georgia, USA	2019	Jekyll Island, Georgia, USA	31.07	-81.4203	1			1	1	1		1							1						M
2014	Dekiff et al	Occurrence and spatial distribution of microplastics in sediments from Norderney	2014	Norderney Island, Germany	53.722	7.2425		1	1							1	1				1						M
2014	Dekiff et al	Occurrence and spatial distribution of microplastics in sediments from Norderney	2014	Norderney Island, Germany	53.7223	7.24548		1	1							1	1				1						M
2014	Dekiff et al	Occurrence and spatial distribution of microplastics in sediments from Norderney	2014	Norderney Island, Germany	53.7189	7.28632	1	1	1							1	1				1						M
2018	Palombini et al	Occurrence and recovery of small-sized plastic debris from a Brazilian beach: characterization, recycling, and mechanical analysis	2018	NE Brazil (Lencois Maranhenses National Park)	-2.46284	-43.0621	1		1												1						M
2012	Ribic et al	Trends in marine debris along the U.S. Pacific Coast and Hawai'I 1998-2007	2012	Pacific (US West & Hawaii)			1			1	1	1		1							1						M
2018	Haseler et al	Monitoring methods for large micro- and meso-litter and applications at Baltic beaches	2018	Wamemunde, Germany	54.1703	12.0785		1				1		1							1						M
2018	Haseler et al	Monitoring methods for large micro- and meso-litter and applications at Baltic beaches	2018	Rosenhagen, Germany	53.9657	10.9353		1	1												1						M
2018	Haseler et al	Monitoring methods for large micro- and meso-litter and applications at Baltic beaches	2018	Poel, Germany	53.9984	11.44		1	1												1						M
2018	Haseler et al	Monitoring methods for large micro- and meso-litter and applications at Baltic beaches	2018	Dars, Germany	54.431	12.4734		1	1												1						M
2018	Haseler et al	Monitoring methods for large micro- and meso-litter and applications at Baltic beaches	2018	Kagsdorf, Germany	54.1464	11.6699		1	1												1						M
2018	Haseler et al	Monitoring methods for large micro- and meso-litter and applications at Baltic beaches	2018	Kuhlungsborn, Germany	54.1534	11.7296		1	1												1						M
2018	Haseler et al	Monitoring methods for large micro- and meso-litter and applications at Baltic beaches	2018	Borgerende, Germany	54.1477	11.8986		1	1												1						M
2018	Haseler et al	Monitoring methods for large micro- and meso-litter and applications at Baltic beaches	2018	Hohe Dune, Germany	54.177	12.1133		1	1												1						M
2018	Haseler et al	Monitoring methods for large micro- and meso-litter and applications at Baltic beaches	2018	Markgrafenheide, Germany	54.19	12.1342		1	1												1						M
2018	Haseler et al	Monitoring methods for large micro- and meso-litter and applications at Baltic beaches	2018	Graal Muritz, Germany	54.2597	12.2422		1	1												1						M
2018	Haseler et al	Monitoring methods for large micro- and meso-litter and applications at Baltic beaches	2018	Giruliai, Lithuania	55.7525	21.0829		1	1												1						M
2018	Haseler et al	Monitoring methods for large micro- and meso-litter and applications at Baltic beaches	2018	Kopgalis, Lithuania	55.7102	21.0962		1	1												1						M
2018	Haseler et al	Monitoring methods for large micro- and meso-litter and applications at Baltic beaches	2018	Smiltyne, Lithuania	55.6827	21.1205		1	1												1						M
2018	Haseler et al	Monitoring methods for large micro- and meso-litter and applications at Baltic beaches	2018	Palanga, Lithuania	55.9202	21.0494		1	1												1						M
2018	Haseler et al	Monitoring methods for large micro- and meso-litter and applications at Baltic beaches	2018	Smiltyne South, Lithuania	55.6827	21.1205		1	1												1						M
2018	Martin et al	Use of unmanned aerial vehicles for efficient beach litter monitoring	2018	Red Sea (North)	26.9109	36.0077	1		1												1						M
2016	Andrades et al	Origin of marine debris is related to disposable packs of ultra-processed food	2016	Vitoria city, Brazil	-20.3	-40.2833	1				1	1		1		1					1						M
2016	Andrades et al	Origin of marine debris is related to disposable packs of ultra-processed food	2016	Fundao city, Brazil	-20	-40.1333	1				1	1		1		1					1						M
2016	Andrades et al	Origin of marine debris is related to disposable packs of ultra-processed food	2016	Regencia, Brazil	-19.65	-39.8167	1				1			1		1					1						M
1998	Thornton & Jackson	Spatial and temporal variations in debris accumulation and composition on an estuarine shoreline, Cliffwood Beach, New Jersey, USA	1998	Cliffwood Beach, New Jersey, USA	40.4524	-74.2228	1				1	1		1		1	1				1						M
1998	Thornton & Jackson	Spatial and temporal variations in debris accumulation and composition on an estuarine shoreline, Cliffwood Beach, New Jersey, USA	1998	Cliffwood Beach, New Jersey, USA	40.4507	-74.2194	1				1	1		1		1	1				1						M
1998	Thornton & Jackson	Spatial and temporal variations in debris accumulation and composition on an estuarine shoreline, Cliffwood Beach, New Jersey, USA	1998	Cliffwood Beach, New Jersey, USA	40.4502	-74.2185	1				1	1		1		1	1				1						M
2017	Naji et al	Plastic debris and microplastics along the beaches of the Strait of Hormuz, Persian Gulf	2017	Khor-e-Azini, Iran	26.3298	57.1074	1	1	1							1					1						M
2017	Naji et al	Plastic debris and microplastics along the beaches of the Strait of Hormuz, Persian Gulf	2017	Khor-e-Yekshabeh, Iran	27.1776	56.3699	1	1	1							1					1						M
2017	Naji et al	Plastic debris and microplastics along the beaches of the Strait of Hormuz, Persian Gulf	2017	Gorsozan, Iran	27.1805	56.2929	1	1	1							1					1						M
2017	Naji et al	Plastic debris and microplastics along the beaches of the Strait of Hormuz, Persian Gulf	2017	Suru, Iran	27.1444	56.2314	1	1	1							1					1						M
2017	Naji et al	Plastic debris and microplastics along the beaches of the Strait of Hormuz, Persian Gulf	2017	Bostanu, Iran	27.0828	56.0076	1	1	1							1					1						M
2017	Naji et al	The occurrence of microplastic contamination in littoral sediments of the Persian Gulf	2017	Khor-e-Azini, Iran	26.3298	57.1074		1								1					1						M
2017	Naji et al	The occurrence of microplastic contamination in littoral sediments of the Persian Gulf	2017	Khor-e-Yekshabeh, Iran	27.1776	56.3699		1								1					1						M
2017	Naji et al	The occurrence of microplastic contamination in littoral sediments of the Persian Gulf	2017	Gorsozan, Iran	27.1805	56.2929		1								1					1						M
2017	Naji et al	The occurrence of microplastic contamination in littoral sediments of the Persian Gulf	2017	Suru, Iran	27.1444	56.2314		1								1					1						M
2017	Naji et al	The occurrence of microplastic contamination in littoral sediments of the Persian Gulf	2017	Bostanu, Iran	27.0828	56.0076		1								1					1						M
2019	Garrison and Fuentes	Marine debris at nesting grounds used by the Northern Gulf of Mexico loggerhead recovery unit	2019	St. Joseph Peninsula State Park, Florida, USA	29.8762	-85.3853	1		1												1						M
2019	Garrison and Fuentes	Marine debris at nesting grounds used by the Northern Gulf of Mexico loggerhead recovery unit	2019	St. Joseph Peninsula, Florida, USA	29.6804	-85.3663	1		1												1						M
2019	Garrison and Fuentes	Marine debris at nesting grounds used by the Northern Gulf of Mexico loggerhead recovery unit	2019	Cape San Blas (Eglin Air Force Base), Florida, USA	29.6768	-85.3631	1		1												1						M
2019	Garrison and Fuentes	Marine debris at nesting grounds used by the Northern Gulf of Mexico loggerhead recovery unit	2019	Cape San Blas, Florida, USA	29.6831	-85.2222	1		1												1						M
2019	Garrison and Fuentes	Marine debris at nesting grounds used by the Northern Gulf of Mexico loggerhead recovery unit	2019	St. Vincent National Wildlife Refuge, Florida, USA	29.6811	-85.2168	1		1												1						M
2019	Garrison and Fuentes	Marine debris at nesting grounds used by the Northern Gulf of Mexico loggerhead recovery unit	2019	Little St. George Island, Florida, USA	29.6131	-84.9595	1		1												1						M
2019	Garrison and Fuentes	Marine debris at nesting grounds used by the Northern Gulf of Mexico loggerhead recovery unit	2019	St. George Island, Florida, USA	29.613	-84.9579	1		1												1						M
2019	Garrison and Fuentes	Marine debris at nesting grounds used by the Northern Gulf of Mexico loggerhead recovery unit	2019	St. George Island State Park, Florida, USA	29.7711	-84.6959	1		1												1						M
2019	Garrison and Fuentes	Marine debris at nesting grounds used by the Northern Gulf of Mexico loggerhead recovery unit	2019	Dog Island, Florida, USA	29.8329	-84.575	1		1												1						M
2019	Garrison and Fuentes	Marine debris at nesting grounds used by the Northern Gulf of Mexico loggerhead recovery unit	2019	Alligator Point, Florida, USA	29.6129	-84.9594	1		1												1						M
2018	Kako et al	Sequential webcam monitoring and modeling of marine debris abundance	2018	Newport, Oregon, USA	44.7	-124.06	1				1	1	1	1							1						M
2006	Walker, Grant & Archambault	Accumulation of marine debris on an intertidal beach in an urban park (Halifax Harbour, Novia Scotia)	2006	Black Rock Beach, Halifax, Canada	44.7431	-63.79	1				0.5	1		1							1						M
2003	Otley & Ingham	Marine debris surveys at Volunteer Beach, Falkland Islands, during the summer of 2001/02	2003	Falkland Islands	-51.4667	-57.8333	1					1		1							1						M
2011	Viehman, Pluym & Schellinger	Characterization of marine debris in North Carolina salt marshes	2011	Beaufort, North Carolina, USA	34.721	-76.674	1				1			1		1	1				1						M
2011	Viehman, Pluym & Schellinger	Characterization of marine debris in North Carolina salt marshes	2011	Beaufort, North Carolina, USA	34.718	-76.671	1				1			1		1	1				1						M
2011	Viehman, Pluym & Schellinger	Characterization of marine debris in North Carolina salt marshes	2011	Beaufort, North Carolina, USA	34.729	-76.688	1				1			1		1	1				1						M
2011	Viehman, Pluym & Schellinger	Characterization of marine debris in North Carolina salt marshes	2011	Beaufort, North Carolina, USA	34.718	-76.673	1				1			1		1	1				1						M
2011	Viehman, Pluym & Schellinger	Characterization of marine debris in North Carolina salt marshes	2011	Rachel Carson National Estuarine Research Reserve, North Carolina, USA	34.708	-76.633	1				1			1		1	1				1						M
2011	Viehman, Pluym & Schellinger	Characterization of marine debris in North Carolina salt marshes	2011	Rachel Carson National Estuarine Research Reserve, North Carolina, USA	34.707	-76.632	1				1			1		1	1				1						M
2011	Viehman, Pluym & Schellinger	Characterization of marine debris in North Carolina salt marshes	2011	Rachel Carson National Estuarine Research Reserve, North Carolina, USA	34.708	-76.631	1				1			1		1	1				1						M
2011	Viehman, Pluym & Schellinger	Characterization of marine debris in North Carolina salt marshes	2011	Rachel Carson National Estuarine Research Reserve, North Carolina, USA	34.707	-76.629	1				1			1		1	1				1						M
2011	Viehman, Pluym & Schellinger	Characterization of marine debris in North Carolina salt marshes	2011	Rachel Carson National Estuarine Research Reserve, North Carolina, USA	34.707	-76.626	1				1			1		1	1				1						M
2011	Viehman, Pluym & Schellinger	Characterization of marine debris in North Carolina salt marshes	2011	Cape Lookout National Seashore, North Carolina, USA	34.656	-76.506	1				1			1		1	1				1						M
2011	Viehman, Pluym & Schellinger	Characterization of marine debris in North Carolina salt marshes	2011	Cape Lookout National Seashore, North Carolina, USA	34.645	-76.511	1				1			1		1	1				1						M
2011	Viehman, Pluym & Schellinger	Characterization of marine debris in North Carolina salt marshes	2011	Cape Lookout National Seashore, North Carolina, USA	34.828	-76.353	1				1			1		1	1				1						M
2011	Viehman, Pluym & Schellinger	Characterization of marine debris in North Carolina salt marshes	2011	Cape Lookout National Seashore, North Carolina, USA	34.67	-76.588	1				1			1		1	1				1						M
2011	Viehman, Pluym & Schellinger	Characterization of marine debris in North Carolina salt marshes	2011	Cape Lookout National Seashore, North Carolina, USA	34.823	-76.364	1				1			1		1	1				1						M
2011	Viehman, Pluym & Schellinger	Characterization of marine debris in North Carolina salt marshes	2011	Cape Lookout National Seashore, North Carolina, USA	34.82	-76.372	1				1			1		1	1				1						M
2016	Sarafraz et al	The preliminary assessment of abundance and composition of marine beach debris in the northern Persian Gulf, Bandar Abbas City, Iran	2016	Bandar Abbas City, Iran	27.1862	56.3363	1		1												1						M
2015	Agustin et al	Temporal variability of marine debris deposition at Tern Island in the Northwestern Hawaiian Islands	2015	Tern Island, Hawaii, USA	23.8667	-166.283	1			1	1	1		1							1						M
2008	Liebezeit	Marine litter on the Kachelotplate, Lower Saxonian Wadden Sea	2008	Kachelotplate, Germany	53.6423	6.83224	1				0.5	1		1							1						M
2004	Edyvane et al	Long-term marine litter moniroting in the remote Great Australian Bight, South Australia	2004	Elliston, South Australia	-33.6222	134.908	1			1				1							1						M
2014	Mathalon & Hill	Microplastic fibers in the intertidal ecosystem surrounding Halifax Harbor, Nova Scotia	2014	McCormack's Beach, Nova Scotia, Canada	44.609	-63.493		1	1							1					1						M
2014	Mathalon & Hill	Microplastic fibers in the intertidal ecosystem surrounding Halifax Harbor, Nova Scotia	2014	Rainbow Haven Beach (Back Lagoon), Nova Scotia, Canada	44.648	-63.417		1	1							1					1						M
2014	Mathalon & Hill	Microplastic fibers in the intertidal ecosystem surrounding Halifax Harbor, Nova Scotia	2014	Rainbow Haven Beach, Nova Scotia, Canada	44.6487	-63.415		1	1							1					1						M
2018	Chubarenko et al	Three-dimensional distribution of anthropogenic microparticles in the body of sandy beaches	2018	Baltic Sea, Russia	54.6343	19.8761		1	1							1					1						M
2018	Chubarenko et al	Three-dimensional distribution of anthropogenic microparticles in the body of sandy beaches	2018	Baltic Sea, Russia	54.6343	19.8761		1	1							1					1						M
2018	Chubarenko et al	Three-dimensional distribution of anthropogenic microparticles in the body of sandy beaches	2018	Baltic Sea, Russia	54.6055	19.8474		1	1							1					1						M
2018	Chubarenko et al	Three-dimensional distribution of anthropogenic microparticles in the body of sandy beaches	2018	Baltic Sea, Russia	54.9661	20.4893		1	1							1					1						M
2017	Esiukova	Plastic pollution on the Baltic beaches of Kaliningrad region, Russia	2017	Vistula Spit, Kaliningrad, Russia	54.6361	19.8777		1	1							1	1	1			1						M
2017	Esiukova	Plastic pollution on the Baltic beaches of Kaliningrad region, Russia	2017	Yantarny, Kaliningrad, Russia	54.9134	19.9372		1	1							1	1	1			1						M
2017	Esiukova	Plastic pollution on the Baltic beaches of Kaliningrad region, Russia	2017	Cape Taran, Kaliningrad, Russia	54.9578	19.9965		1	1							1	1	1			1						M
2017	Esiukova	Plastic pollution on the Baltic beaches of Kaliningrad region, Russia	2017	Svetlogorsk, Kaliningrad, Russia	54.9475	20.087		1	1							1	1	1			1						M
2017	Esiukova	Plastic pollution on the Baltic beaches of Kaliningrad region, Russia	2017	Pionersky, Kaliningrad, Russia	54.9582	20.2071		1	1							1	1	1			1						M
2017	Esiukova	Plastic pollution on the Baltic beaches of Kaliningrad region, Russia	2017	Cape Gvardeysky, Kaliningrad, Russia	54.9603	20.2726		1	1							1	1	1			1						M
2017	Esiukova	Plastic pollution on the Baltic beaches of Kaliningrad region, Russia	2017	Zaostrovye, Kaliningrad, Russia	54.9411	20.3096		1	1							1	1	1			1						M
2017	Esiukova	Plastic pollution on the Baltic beaches of Kaliningrad region, Russia	2017	Amber, Kaliningrad, Russia	54.9371	20.352		1	1							1	1	1			1						M
2017	Esiukova	Plastic pollution on the Baltic beaches of Kaliningrad region, Russia	2017	Kulikovo, Kaliningrad, Russia	54.9419	20.3989		1	1							1	1	1			1						M
2017	Esiukova	Plastic pollution on the Baltic beaches of Kaliningrad region, Russia	2017	Wind Park, Kaliningrad, Russia	54.9467	20.4191		1	1							1	1	1			1						M
2017	Esiukova	Plastic pollution on the Baltic beaches of Kaliningrad region, Russia	2017	Roshchino, Kaliningrad, Russia	54.9562	20.4568		1	1							1	1	1			1						M
2017	Esiukova	Plastic pollution on the Baltic beaches of Kaliningrad region, Russia	2017	Zelenogradsk,Kaliningrad, Russia	54.9668	20.4925		1	1							1	1	1			1						M
2017	Esiukova	Plastic pollution on the Baltic beaches of Kaliningrad region, Russia	2017	Curonian Spit, Kaliningrad, Russia	54.9744	20.5138		1	1							1	1	1			1						M
2017	Mahat	Separation and quantification of microplastics from beach and sediment samples using the Bauta microplastic-sediment separator	2017	Oslo (Bygdøy sjøbad)	59.9109	10.6663		1	1							1					1						M
2010	Costa et al	On the importance of size of plastic fragments and pellets on the strandline: a snapshot of a Brazilian beach	2010	Brazil (Recife)	-8.09315	-34.8815		1	1							1					1						M
2011	Martins & Sobral	Plastic marine debris on the Portuguese coastline: A matter of size?	2011	Agudela, Portugal	41.2412	-8.72703		1	1							1					1						M
2011	Martins & Sobral	Plastic marine debris on the Portuguese coastline: A matter of size?	2011	Cova de Alfarroba, Portugal	39.3652	-9.34332		1	1							1					1						M
2011	Martins & Sobral	Plastic marine debris on the Portuguese coastline: A matter of size?	2011	Cresmina, Portugal	38.7254	-9.4763		1	1							1					1						M
2011	Martins & Sobral	Plastic marine debris on the Portuguese coastline: A matter of size?	2011	Fonta da Telha, Portugal	38.5723	-9.19663		1	1							1					1						M
2011	Martins & Sobral	Plastic marine debris on the Portuguese coastline: A matter of size?	2011	Bordeira, Portugal	37.2022	-8.8992		1	1							1					1						M
2013	Jayasiri, Purushothaman & Vennila	Quantitative analysis of plastic debris on recreational beaches in Mumbai, India	2013	Aksa, Mumbai, India	19.176	72.7953		1			1	1		1		1					1						M
2013	Jayasiri, Purushothaman & Vennila	Quantitative analysis of plastic debris on recreational beaches in Mumbai, India	2013	Versova, India	19.1238	72.8177		1			1	1		1		1					1						M
2013	Jayasiri, Purushothaman & Vennila	Quantitative analysis of plastic debris on recreational beaches in Mumbai, India	2013	Juhu, India	19.0969	72.8266		1			1	1		1		1					1						M
2013	Jayasiri, Purushothaman & Vennila	Quantitative analysis of plastic debris on recreational beaches in Mumbai, India	2013	Dadar, India	19.0208	72.8293		1			1	1		1		1					1						M
2011	Barasarathi et al	Microplastic abundance in selected mangrove forest in Malaysia	2011	Kapar, Selangor, Malaysia	3.0796326.	101.355		1	1												1					1	M
2014	Mohamed Nor & Obbard	Microplastics in Singapore's coastal mangrove ecosystems	2014	Pasir Ris, Singapore	1.38373	103.947		1	1												1						M
2014	Mohamed Nor & Obbard	Microplastics in Singapore's coastal mangrove ecosystems	2014	Changi, Singapore	1.39095	103.992		1	1												1						M
2014	Mohamed Nor & Obbard	Microplastics in Singapore's coastal mangrove ecosystems	2014	Lim Chu Kang, Singapore	1.43054	103.717		1	1												1						M
2014	Mohamed Nor & Obbard	Microplastics in Singapore's coastal mangrove ecosystems	2014	Pulau Ubin, Singapore	1.41296	103.958		1	1												1						M
2014	Mohamed Nor & Obbard	Microplastics in Singapore's coastal mangrove ecosystems	2014	Pulau Semakau, Singapore	1.20676	103.771		1	1												1						M
2014	Mohamed Nor & Obbard	Microplastics in Singapore's coastal mangrove ecosystems	2014	Sungei Buloh, Singapore	1.44804	103.725		1	1												1						M
2014	Mohamed Nor & Obbard	Microplastics in Singapore's coastal mangrove ecosystems	2014	Berlayar Creek, Singapore	1.26845	103.804		1	1												1						M
2013	Fries et al	Identification of Polymer types and additives in marine microplasticparticles using pyrolysis-GC/MS and scanning electron microscopy	2013	Norderney Island, Germany	53.7167	7.25027		1	1												1					1	M
2013	Fries et al	Identification of Polymer types and additives in marine microplasticparticles using pyrolysis-GC/MS and scanning electron microscopy	2013	Norderney Island, Germany	53.7167	7.28355		1	1												1					1	M
2014	Nuelle et al	A new analytical approach for monitoring microplastics in marine sediments	2014	Norderney Island, Germany	53.7221	7.24397		1	1												1					1	M
2014	Nuelle et al	A new analytical approach for monitoring microplastics in marine sediments	2014	Norderney Island, Germany	53.7224	7.24703		1	1												1					1	M
2014	Nuelle et al	A new analytical approach for monitoring microplastics in marine sediments	2014	Norderney Island, Germany	53.7224	7.24702		1	1												1					1	M
2006	Reddy et al	Description of the small plastics fragments in marine sediments along the Alang-Sosiya ship-breaking yard, India	2006	India (NW Gulf of Cambay)	21.6884	72.4258		1						1							1					1	M
2015	Stolte et al	Microplastic concentrations in beach sediments along the German Baltic coast	2015	Neinhagen, Rostock, Germany	54.1662	11.9626		1			0.5	1		1		1					1						M
2015	Stolte et al	Microplastic concentrations in beach sediments along the German Baltic coast	2015	Wilhelmshohe, Germany	54.1765	12.0267		1			0.5	1		1		1					1						M
2015	Stolte et al	Microplastic concentrations in beach sediments along the German Baltic coast	2015	Warnameunde, Germany	54.1833	12.0831		1			0.5	1		1		1					1						M
2015	Stolte et al	Microplastic concentrations in beach sediments along the German Baltic coast	2015	Markgrafenheide, Germany	54.1938	12.1393		1			0.5	1		1		1					1						M
2015	Stolte et al	Microplastic concentrations in beach sediments along the German Baltic coast	2015	Binz, Rugen, Germany	54.4028	13.6146		1			0.5	1		1		1					1						M
2015	Stolte et al	Microplastic concentrations in beach sediments along the German Baltic coast	2015	Breege, Germany	54.6023	13.3897		1			0.5	1		1		1					1						M
2015	Stolte et al	Microplastic concentrations in beach sediments along the German Baltic coast	2015	Dranske, Germany	54.6332	13.2208		1			0.5	1		1		1					1						M
2015	Stolte et al	Microplastic concentrations in beach sediments along the German Baltic coast	2015	Heidehof, Germany	54.666	13.2674		1			0.5	1		1		1					1						M
2015	Stolte et al	Microplastic concentrations in beach sediments along the German Baltic coast	2015	Kamminke, Oder/Peene Estuary, Germany	53.8668	14.2124		1			0.5	1		1		1					1						M
2015	Stolte et al	Microplastic concentrations in beach sediments along the German Baltic coast	2015	Freest, Germany	54.1403	13.7285		1			0.5	1		1		1					1						M
2015	Stolte et al	Microplastic concentrations in beach sediments along the German Baltic coast	2015	Dangast, Jade Bay, Germany	53.4519	8.12352		1			0.5	1		1		1					1						M
2017	Abidli et al	The First Evaluation of Microplastics in Sediments from the Complex Lagoon-Channel of Bizerte (Northern Tunisia)	2017	Menzel Abderrahmane, Tunisia	37.243	9.87392		1	1								1		1		1						M
2017	Abidli et al	The First Evaluation of Microplastics in Sediments from the Complex Lagoon-Channel of Bizerte (Northern Tunisia)	2017	Menzel Jemil, Tunisia	37.2382	9.91858		1	1								1		1		1						M
2017	Abidli et al	The First Evaluation of Microplastics in Sediments from the Complex Lagoon-Channel of Bizerte (Northern Tunisia)	2017	Carrier Bay, Tunisia	37.2288	9.81604		1	1								1		1		1						M
2017	Abidli et al	The First Evaluation of Microplastics in Sediments from the Complex Lagoon-Channel of Bizerte (Northern Tunisia)	2017	Channel of Bizerte, Tunisia	37.2626	9.867		1	1								1		1		1						M
2018	Abidli et al	Microplastics in sediments from the littoral zone of the north Tunisian coast (Mediterranean Sea)	2018	Menzel Bourguiba, Tunisia	37.1438	9.78453		1	1								1		1		1						M
2018	Abidli et al	Microplastics in sediments from the littoral zone of the north Tunisian coast (Mediterranean Sea)	2018	Northern Lake of Tunis, Tunisia	36.8282	10.2139		1	1								1		1		1						M
2018	Abidli et al	Microplastics in sediments from the littoral zone of the north Tunisian coast (Mediterranean Sea)	2018	Southern Lake of Tunis, Tunisia	36.8016	10.2463		1	1								1		1		1						M
2018	Abidli et al	Microplastics in sediments from the littoral zone of the north Tunisian coast (Mediterranean Sea)	2018	Goulette, Tunisia	36.8201	10.3024		1	1								1		1		1						M
2018	Abidli et al	Microplastics in sediments from the littoral zone of the north Tunisian coast (Mediterranean Sea)	2018	Carthage, Tunisia	36.8585	10.3369		1	1								1		1		1						M
2015	Acosta-Coley & Olivero-Verbel	Microplastic resin pellets on an urba tropical beach in Colombia	2015	Cartagena, Colombia	10.3904	-75.5037	1				1	1		1							1					1	M
2017	Akhbarizadeh et al	Microplastics and potentially toxic elements in coastal sediments of Iran's main oil terminal (Khark Island)	2017	Khark Island, Iran	29.2686	50.2821		1	1												1					1	M
2017	Akhbarizadeh et al	Microplastics and potentially toxic elements in coastal sediments of Iran's main oil terminal (Khark Island)	2017	Khark Island, Iran	29.2448	50.2937		1	1												1					1	M
2017	Akhbarizadeh et al	Microplastics and potentially toxic elements in coastal sediments of Iran's main oil terminal (Khark Island)	2017	Khark Island, Iran	29.2365	50.2969		1	1												1					1	M
2017	Akhbarizadeh et al	Microplastics and potentially toxic elements in coastal sediments of Iran's main oil terminal (Khark Island)	2017	Khark Island, Iran	29.2156	50.304		1	1												1					1	M
2017	Akhbarizadeh et al	Microplastics and potentially toxic elements in coastal sediments of Iran's main oil terminal (Khark Island)	2017	Khark Island, Iran	29.2095	50.3088		1	1												1					1	M
2017	Akhbarizadeh et al	Microplastics and potentially toxic elements in coastal sediments of Iran's main oil terminal (Khark Island)	2017	Khark Island, Iran	29.208	50.3243		1	1												1					1	M
2017	Akhbarizadeh et al	Microplastics and potentially toxic elements in coastal sediments of Iran's main oil terminal (Khark Island)	2017	Khark Island, Iran	29.2129	50.3294		1	1												1					1	M
2017	Akhbarizadeh et al	Microplastics and potentially toxic elements in coastal sediments of Iran's main oil terminal (Khark Island)	2017	Khark Island, Iran	29.2267	50.3287		1	1												1					1	M
2017	Akhbarizadeh et al	Microplastics and potentially toxic elements in coastal sediments of Iran's main oil terminal (Khark Island)	2017	Khark Island, Iran	29.235	50.3293		1	1												1					1	M
2017	Akhbarizadeh et al	Microplastics and potentially toxic elements in coastal sediments of Iran's main oil terminal (Khark Island)	2017	Khark Island, Iran	29.2448	50.3293		1	1												1					1	M
2017	Akhbarizadeh et al	Microplastics and potentially toxic elements in coastal sediments of Iran's main oil terminal (Khark Island)	2017	Khark Island, Iran	29.2662	50.3222		1	1												1					1	M
2018	Beckwith et al	Microplastic at nesting grounds used by the northern Gulf of Mexico loggerhead recovery unit	2018	Florida, USA	29.8268	-85.4168		1	1							1					1						M
2018	Beckwith et al	Microplastic at nesting grounds used by the northern Gulf of Mexico loggerhead recovery unit	2018	Florida, USA	29.7492	-85.3999		1	1							1					1						M
2018	Beckwith et al	Microplastic at nesting grounds used by the northern Gulf of Mexico loggerhead recovery unit	2018	Florida, USA	29.6735	-85.3399		1	1							1					1						M
2018	Beckwith et al	Microplastic at nesting grounds used by the northern Gulf of Mexico loggerhead recovery unit	2018	Florida, USA	29.6833	-85.2706		1	1							1					1						M
2018	Beckwith et al	Microplastic at nesting grounds used by the northern Gulf of Mexico loggerhead recovery unit	2018	Florida, USA	29.6501	-85.16		1	1							1					1						M
2018	Beckwith et al	Microplastic at nesting grounds used by the northern Gulf of Mexico loggerhead recovery unit	2018	Florida, USA	29.5895	-85.0493		1	1							1					1						M
2018	Beckwith et al	Microplastic at nesting grounds used by the northern Gulf of Mexico loggerhead recovery unit	2018	Florida, USA	29.6731	-84.8261		1	1							1					1						M
2018	Beckwith et al	Microplastic at nesting grounds used by the northern Gulf of Mexico loggerhead recovery unit	2018	Florida, USA	29.7278	-84.7334		1	1							1					1						M
2018	Beckwith et al	Microplastic at nesting grounds used by the northern Gulf of Mexico loggerhead recovery unit	2018	Florida, USA	29.7974	-84.6057		1	1							1					1						M
2018	Beckwith et al	Microplastic at nesting grounds used by the northern Gulf of Mexico loggerhead recovery unit	2018	Florida, USA	29.8971	-84.3911		1	1							1					1						M
2017	Besley et al	A standardized method for sampling and extraction methods for quantifying microplastics in beach sand	2017	Meijendel Beach, Netherlands	52.1414	4.321		1		1				1		1					1						M
2011	Browne et al	Accumulation of Microplastic on Shorelines Woldwide: Sources and Sinks	2011	Port Douglas, Australia	-16.4833	145.467		1	1							1					1						M
2011	Browne et al	Accumulation of Microplastic on Shorelines Woldwide: Sources and Sinks	2011	Busselton Beach, Australia	-33.65	115.317		1	1							1					1						M
2011	Browne et al	Accumulation of Microplastic on Shorelines Woldwide: Sources and Sinks	2011	Kyushu, Japan	32.4	131.65		1	1							1					1						M
2011	Browne et al	Accumulation of Microplastic on Shorelines Woldwide: Sources and Sinks	2011	Dubai, Oman, UAE	25.2833	55.3		1	1							1					1						M
2011	Browne et al	Accumulation of Microplastic on Shorelines Woldwide: Sources and Sinks	2011	Vina Del Mar	-32.9333	-71.5333		1	1							1					1						M
2011	Browne et al	Accumulation of Microplastic on Shorelines Woldwide: Sources and Sinks	2011	Punta Arenas	-53.1333	-70.8833		1	1							1					1						M
2011	Browne et al	Accumulation of Microplastic on Shorelines Woldwide: Sources and Sinks	2011	Malapascua Island, Phillippines	11.336	124.116		1	1							1					1						M
2011	Browne et al	Accumulation of Microplastic on Shorelines Woldwide: Sources and Sinks	2011	Faro, Portugal	36.9833	-7.97861		1	1							1					1						M
2011	Browne et al	Accumulation of Microplastic on Shorelines Woldwide: Sources and Sinks	2011	Ponta Delgado, Azores	37.7333	-25.5953		1	1							1					1						M
2011	Browne et al	Accumulation of Microplastic on Shorelines Woldwide: Sources and Sinks	2011	Virginia, USA	36.9333	-76.2619		1	1							1					1						M
2011	Browne et al	Accumulation of Microplastic on Shorelines Woldwide: Sources and Sinks	2011	Virginia, USA	36.95	76.2619		1	1							1					1						M
2011	Browne et al	Accumulation of Microplastic on Shorelines Woldwide: Sources and Sinks	2011	California, USA	35.8333	118.412		1	1							1					1						M
2011	Browne et al	Accumulation of Microplastic on Shorelines Woldwide: Sources and Sinks	2011	Western Cape, South Africa	-33.1	17.9786		1	1							1					1						M
2011	Browne et al	Accumulation of Microplastic on Shorelines Woldwide: Sources and Sinks	2011	Pemba, Mozambique	-19.0167	36.0453		1	1							1					1						M
2011	Browne et al	Accumulation of Microplastic on Shorelines Woldwide: Sources and Sinks	2011	Sennon Cove, UK	50.0667	-5.71194		1	1							1					1						M
2018	Ceccarini et al	The Hidden Microplastics: New Insights and Figures from the Thorough Separation and Characterization of Microplastics and of their degradation byproducts in coastal sediments	2018	Marina di Vecchiano, Tuscany, Italy	43.8028	10.2638		1	1							1	1				1						M
2018	Ceccarini et al	The Hidden Microplastics: New Insights and Figures from the Thorough Separation and Characterization of Microplastics and of their degradation byproducts in coastal sediments	2018	Marina di Vecchiano, Tuscany, Italy	43.8027	10.2637		1	1							1	1				1						M
2018	Ceccarini et al	The Hidden Microplastics: New Insights and Figures from the Thorough Separation and Characterization of Microplastics and of their degradation byproducts in coastal sediments	2018	Marina di Vecchiano, Tuscany, Italy	43.8029	10.2637		1	1							1	1				1						M
2018	Ceccarini et al	The Hidden Microplastics: New Insights and Figures from the Thorough Separation and Characterization of Microplastics and of their degradation byproducts in coastal sediments	2018	Marina di Vecchiano, Tuscany, Italy	43.8037	10.2633		1	1							1	1				1						M
2018	Ceccarini et al	The Hidden Microplastics: New Insights and Figures from the Thorough Separation and Characterization of Microplastics and of their degradation byproducts in coastal sediments	2018	Marina di Vecchiano, Tuscany, Italy	43.8026	10.263		1	1							1	1				1						M
2018	Ceccarini et al	The Hidden Microplastics: New Insights and Figures from the Thorough Separation and Characterization of Microplastics and of their degradation byproducts in coastal sediments	2018	Marina di Vecchiano, Tuscany, Italy	43.803	10.2629		1	1							1	1				1						M
2018	Ceccarini et al	The Hidden Microplastics: New Insights and Figures from the Thorough Separation and Characterization of Microplastics and of their degradation byproducts in coastal sediments	2018	Marina di Vecchiano, Tuscany, Italy	43.803	10.2628		1	1							1	1				1						M
2018	Ceccarini et al	The Hidden Microplastics: New Insights and Figures from the Thorough Separation and Characterization of Microplastics and of their degradation byproducts in coastal sediments	2018	Marina di Vecchiano, Tuscany, Italy	43.8034	10.2626		1	1							1	1				1						M
2018	Ceccarini et al	The Hidden Microplastics: New Insights and Figures from the Thorough Separation and Characterization of Microplastics and of their degradation byproducts in coastal sediments	2018	Marina di Vecchiano, Tuscany, Italy	43.8029	10.2624		1	1							1	1				1						M
2018	Ceccarini et al	The Hidden Microplastics: New Insights and Figures from the Thorough Separation and Characterization of Microplastics and of their degradation byproducts in coastal sediments	2018	Marina di Vecchiano, Tuscany, Italy	43.8027	10.2625		1	1							1	1				1						M
2018	Ceccarini et al	The Hidden Microplastics: New Insights and Figures from the Thorough Separation and Characterization of Microplastics and of their degradation byproducts in coastal sediments	2018	Marina di Vecchiano, Tuscany, Italy	43.8029	10.2625		1	1							1	1				1						M
2018	Ceccarini et al	The Hidden Microplastics: New Insights and Figures from the Thorough Separation and Characterization of Microplastics and of their degradation byproducts in coastal sediments	2018	Marina di Vecchiano, Tuscany, Italy	43.8033	10.2623		1	1							1	1				1						M
2018	Ceccarini et al	The Hidden Microplastics: New Insights and Figures from the Thorough Separation and Characterization of Microplastics and of their degradation byproducts in coastal sediments	2018	Marina di Vecchiano, Tuscany, Italy	43.8026	10.2623		1	1							1	1				1						M
2018	Ceccarini et al	The Hidden Microplastics: New Insights and Figures from the Thorough Separation and Characterization of Microplastics and of their degradation byproducts in coastal sediments	2018	Marina di Vecchiano, Tuscany, Italy	43.8029	10.2622		1	1							1	1				1						M
2018	Ceccarini et al	The Hidden Microplastics: New Insights and Figures from the Thorough Separation and Characterization of Microplastics and of their degradation byproducts in coastal sediments	2018	Marina di Vecchiano, Tuscany, Italy	43.8033	10.2622		1	1							1	1				1						M
2018	Ceccarini et al	The Hidden Microplastics: New Insights and Figures from the Thorough Separation and Characterization of Microplastics and of their degradation byproducts in coastal sediments	2018	Marina di Vecchiano, Tuscany, Italy	43.8029	10.2622		1	1							1	1				1						M
2016	Cheung et al	Seasonal variation in the abundance of marine plastic debris in the estuary of a subtropical macro-scale drainage basin in South China	2016	Ap Tsai Hang, Hong Kong	22.4389	113.948		1			1			1		1					1						M
2016	Cheung et al	Seasonal variation in the abundance of marine plastic debris in the estuary of a subtropical macro-scale drainage basin in South China	2016	Ha Pak Lai, Hong Kong	22.4247	113.941		1			1			1		1					1						M
2016	Cheung et al	Seasonal variation in the abundance of marine plastic debris in the estuary of a subtropical macro-scale drainage basin in South China	2016	Tung Lung Chau, Hong Kong	22.2482	114.29		1			1			1		1					1						M
2016	Cheung et al	Seasonal variation in the abundance of marine plastic debris in the estuary of a subtropical macro-scale drainage basin in South China	2016	Long Ke Wan, Hong Kong	22.3743	114.376		1			1			1		1					1						M
2016	Cheung et al	Seasonal variation in the abundance of marine plastic debris in the estuary of a subtropical macro-scale drainage basin in South China	2016	Nam Fung Wan, Hong Kong	22.3761	114.334		1			1			1		1					1						M
2016	Cheung et al	Seasonal variation in the abundance of marine plastic debris in the estuary of a subtropical macro-scale drainage basin in South China	2016	San Shek Wan, Hong Kong	22.2816	113.896		1			1			1		1					1						M
2016	Cheung et al	Seasonal variation in the abundance of marine plastic debris in the estuary of a subtropical macro-scale drainage basin in South China	2016	Sharp Island, Hong Kong	22.3632	114.294		1			1			1		1					1						M
2016	Cheung et al	Seasonal variation in the abundance of marine plastic debris in the estuary of a subtropical macro-scale drainage basin in South China	2016	Pak Shui Wun, Hong Kong	22.3413	114.266		1			1			1		1					1						M
2016	Cheung et al	Seasonal variation in the abundance of marine plastic debris in the estuary of a subtropical macro-scale drainage basin in South China	2016	Fan Lau Tung Wan, Hong Kong	22.1998	113.86		1			1			1		1					1						M
2016	Cheung et al	Seasonal variation in the abundance of marine plastic debris in the estuary of a subtropical macro-scale drainage basin in South China	2016	Cheung Chau, Hong Kong	22.2017	114.026		1			1			1		1					1						M
2016	Cheung et al	Seasonal variation in the abundance of marine plastic debris in the estuary of a subtropical macro-scale drainage basin in South China	2016	Shek Pai Wan, Hong Kong	22.2468	114.149		1			1			1		1					1						M
2016	Cheung et al	Seasonal variation in the abundance of marine plastic debris in the estuary of a subtropical macro-scale drainage basin in South China	2016	Shek O Wan, Hong Kong	22.2286	114.251		1			1			1		1					1						M
2016	Cheung et al	Seasonal variation in the abundance of marine plastic debris in the estuary of a subtropical macro-scale drainage basin in South China	2016	Cheung Sha, Hong Kong	22.3357	114.151		1			1			1		1					1						M
2016	Cheung et al	Seasonal variation in the abundance of marine plastic debris in the estuary of a subtropical macro-scale drainage basin in South China	2016	Stanley Ma Hang, Hong Kong	22.2175	114.208		1			1			1		1					1						M
2016	Cheung et al	Seasonal variation in the abundance of marine plastic debris in the estuary of a subtropical macro-scale drainage basin in South China	2016	Peng Chau, Hong Kong	22.2831	114.041		1			1			1		1					1						M
2016	Cheung et al	Seasonal variation in the abundance of marine plastic debris in the estuary of a subtropical macro-scale drainage basin in South China	2016	Ma Shi Chau, Hong Kong	22.4551	114.23		1			1			1		1					1						M
2016	Cheung et al	Seasonal variation in the abundance of marine plastic debris in the estuary of a subtropical macro-scale drainage basin in South China	2016	Pak Shek, Hong Kong	22.4282	114.208		1			1			1		1					1						M
2016	Cheung et al	Seasonal variation in the abundance of marine plastic debris in the estuary of a subtropical macro-scale drainage basin in South China	2016	Lai Chi CHong, Hong Kong	22.4516	114.301		1			1			1		1					1						M
2016	Cheung et al	Seasonal variation in the abundance of marine plastic debris in the estuary of a subtropical macro-scale drainage basin in South China	2016	Ma Wan Pak Wan, Hong Kong	22.3554	114.062		1			1			1		1					1						M
2016	Cheung et al	Seasonal variation in the abundance of marine plastic debris in the estuary of a subtropical macro-scale drainage basin in South China	2016	Lei Yue Mun, Hong Kong	22.2848	114.238		1			1			1		1					1						M
2016	Cheung et al	Seasonal variation in the abundance of marine plastic debris in the estuary of a subtropical macro-scale drainage basin in South China	2016	Nam Fung Wan, Hong Kong	22.3761	114.334		1			1			1		1					1						M
2016	Cheung et al	Seasonal variation in the abundance of marine plastic debris in the estuary of a subtropical macro-scale drainage basin in South China	2016	Tung O Wan, Hong Kong	22.1956	114.155		1			1			1		1					1						M
2016	Cheung et al	Seasonal variation in the abundance of marine plastic debris in the estuary of a subtropical macro-scale drainage basin in South China	2016	Nam She Wan, Hong Kong	22.4371	114.371		1			1			1		1					1						M
2016	Cheung et al	Seasonal variation in the abundance of marine plastic debris in the estuary of a subtropical macro-scale drainage basin in South China	2016	Tai Long Sai Wan, Hong Kong	22.3989	114.37		1			1			1		1					1						M
2016	Cheung et al	Seasonal variation in the abundance of marine plastic debris in the estuary of a subtropical macro-scale drainage basin in South China	2016	Lung Kwu Tan, Hong Kong	22.3893	113.92		1			1			1		1					1						M
2016	de Carvalho and Neto	Microplastic pollution of the beaches of Guanabara Bay, Southeast Brazil	2016	Tsing Lung Garden, Brazil	22.3659	113.997		1			1			1		1					1						M
2016	de Carvalho and Neto	Microplastic pollution of the beaches of Guanabara Bay, Southeast Brazil	2016	Copacabana, Brazil	-22.971	-43.1824		1			1			1		1					1						M
2016	de Carvalho and Neto	Microplastic pollution of the beaches of Guanabara Bay, Southeast Brazil	2016	Botafogo, Brazil	-22.9452	-43.1807		1			1			1		1					1						M
2016	de Carvalho and Neto	Microplastic pollution of the beaches of Guanabara Bay, Southeast Brazil	2016	Flamengo, Brazil	-22.9298	-43.1714		1			1			1		1					1						M
2016	de Carvalho and Neto	Microplastic pollution of the beaches of Guanabara Bay, Southeast Brazil	2016	Bica, Brazil	-22.8187	-43.1997		1			1			1		1					1						M
2016	de Carvalho and Neto	Microplastic pollution of the beaches of Guanabara Bay, Southeast Brazil	2016	Galeao, Brazil	-22.8171	-43.2279		1			1			1		1					1						M
2016	de Carvalho and Neto	Microplastic pollution of the beaches of Guanabara Bay, Southeast Brazil	2016	Maua, Brazil	-22.7141	-43.1738		1			1			1		1					1						M
2016	de Carvalho and Neto	Microplastic pollution of the beaches of Guanabara Bay, Southeast Brazil	2016	Piedade, Brazil	-22.6739	-43.0657		1			1			1		1					1						M
2016	de Carvalho and Neto	Microplastic pollution of the beaches of Guanabara Bay, Southeast Brazil	2016	Pedrinhas, Brazil	-22.8096	-43.0717		1			1			1		1					1						M
2016	de Carvalho and Neto	Microplastic pollution of the beaches of Guanabara Bay, Southeast Brazil	2016	Barreto, Brazil	-22.865	-43.1		1			1			1		1					1						M
2016	de Carvalho and Neto	Microplastic pollution of the beaches of Guanabara Bay, Southeast Brazil	2016	Gragoata, Brazil	-22.9035	-43.1329		1			1			1		1					1						M
2016	de Carvalho and Neto	Microplastic pollution of the beaches of Guanabara Bay, Southeast Brazil	2016	Boa Viagem, Brazil	-22.9086	-43.1302		1			1			1		1					1						M
2016	de Carvalho and Neto	Microplastic pollution of the beaches of Guanabara Bay, Southeast Brazil	2016	Icarai, Brazil	-22.9062	-43.1133		1			1			1		1					1						M
2016	de Carvalho and Neto	Microplastic pollution of the beaches of Guanabara Bay, Southeast Brazil	2016	Sao Francisco, Brazil	-22.9181	-43.0949		1			1			1		1					1						M
2016	de Carvalho and Neto	Microplastic pollution of the beaches of Guanabara Bay, Southeast Brazil	2016	Charitas, Brazil	-22.9335	-43.0995		1			1			1		1					1						M
2016	de Carvalho and Neto	Microplastic pollution of the beaches of Guanabara Bay, Southeast Brazil	2016	Piratininga, Brazil	-22.9549	-43.0844		1			1			1		1					1						M
2016	de Carvalho and Neto	Microplastic pollution of the beaches of Guanabara Bay, Southeast Brazil	2016	Camboinhas, Brazil	-22.9608	-43.0608		1			1			1		1					1						M
2018	Dobaradaran et al	Characterization of plastic debris and association of metals with microplastics in coastline sediment along the Persian Gulf	2018	Shif iland, Bushehr, Iran	29.0247	50.8899		1	1												1					1	M
2018	Dobaradaran et al	Characterization of plastic debris and association of metals with microplastics in coastline sediment along the Persian Gulf	2018	Abasak iland, Bushehr, Iran	28.995	50.8804		1	1												1					1	M
2018	Dobaradaran et al	Characterization of plastic debris and association of metals with microplastics in coastline sediment along the Persian Gulf	2018	Negin iland, Bushehr, Iran	28.9893	50.8589		1	1												1					1	M
2018	Dobaradaran et al	Characterization of plastic debris and association of metals with microplastics in coastline sediment along the Persian Gulf	2018	TV Park, Iran	28.9984	50.8298		1	1												1					1	M
2018	Dobaradaran et al	Characterization of plastic debris and association of metals with microplastics in coastline sediment along the Persian Gulf	2018	Jofresh, Iran	28.9681	50.82		1	1												1					1	M
2018	Dobaradaran et al	Characterization of plastic debris and association of metals with microplastics in coastline sediment along the Persian Gulf	2018	Shoghab, Iran	28.9118	50.8152		1	1												1					1	M
2018	Dobaradaran et al	Characterization of plastic debris and association of metals with microplastics in coastline sediment along the Persian Gulf	2018	Rishehr, Iran	28.9106	50.8157		1	1												1					1	M
2018	Dobaradaran et al	Characterization of plastic debris and association of metals with microplastics in coastline sediment along the Persian Gulf	2018	Lian Park, Iran	28.887	50.8347		1	1												1					1	M
2018	Dobaradaran et al	Characterization of plastic debris and association of metals with microplastics in coastline sediment along the Persian Gulf	2018	Bandargah, Iran	28.8217	50.9442		1	1												1					1	M
2018	Duncan et al	The true depth of the Mediterranean plastic problem: Extreme microplastic pollution on marine turtle nesting beaches in Cyprus	2018	Cyprus	35.2931	32.9394		1	1							1					1						M
2018	Duncan et al	The true depth of the Mediterranean plastic problem: Extreme microplastic pollution on marine turtle nesting beaches in Cyprus	2018	Cyprus	35.3263	32.9353		1	1							1					1						M
2018	Duncan et al	The true depth of the Mediterranean plastic problem: Extreme microplastic pollution on marine turtle nesting beaches in Cyprus	2018	Cyprus	35.367	32.9233		1	1							1					1						M
2018	Duncan et al	The true depth of the Mediterranean plastic problem: Extreme microplastic pollution on marine turtle nesting beaches in Cyprus	2018	Cyprus	35.3325	33.4828		1	1							1					1						M
2018	Duncan et al	The true depth of the Mediterranean plastic problem: Extreme microplastic pollution on marine turtle nesting beaches in Cyprus	2018	Cyprus	35.3346	33.493		1	1							1					1						M
2018	Duncan et al	The true depth of the Mediterranean plastic problem: Extreme microplastic pollution on marine turtle nesting beaches in Cyprus	2018	Cyprus	33.3542	33.5975		1	1							1					1						M
2018	Duncan et al	The true depth of the Mediterranean plastic problem: Extreme microplastic pollution on marine turtle nesting beaches in Cyprus	2018	Cyprus	35.4119	33.8636		1	1							1					1						M
2018	Duncan et al	The true depth of the Mediterranean plastic problem: Extreme microplastic pollution on marine turtle nesting beaches in Cyprus	2018	Cyprus	35.4159	34.1717		1	1							1					1						M
2018	Duncan et al	The true depth of the Mediterranean plastic problem: Extreme microplastic pollution on marine turtle nesting beaches in Cyprus	2018	Cyprus	35.5483	34.1717		1	1							1					1						M
2018	Duncan et al	The true depth of the Mediterranean plastic problem: Extreme microplastic pollution on marine turtle nesting beaches in Cyprus	2018	Cyprus	35.6007	34.3339		1	1							1					1						M
2018	Duncan et al	The true depth of the Mediterranean plastic problem: Extreme microplastic pollution on marine turtle nesting beaches in Cyprus	2018	Cyprus	35.6263	34.3697		1	1							1					1						M
2018	Duncan et al	The true depth of the Mediterranean plastic problem: Extreme microplastic pollution on marine turtle nesting beaches in Cyprus	2018	Cyprus	35.6667	34.5722		1	1							1					1						M
2018	Duncan et al	The true depth of the Mediterranean plastic problem: Extreme microplastic pollution on marine turtle nesting beaches in Cyprus	2018	Cyprus	35.6412	34.5469		1	1							1					1						M
2018	Duncan et al	The true depth of the Mediterranean plastic problem: Extreme microplastic pollution on marine turtle nesting beaches in Cyprus	2018	Cyprus	35.523	34.3397		1	1							1					1						M
2018	Duncan et al	The true depth of the Mediterranean plastic problem: Extreme microplastic pollution on marine turtle nesting beaches in Cyprus	2018	Cyprus	35.3651	34.0794		1	1							1					1						M
2018	Duncan et al	The true depth of the Mediterranean plastic problem: Extreme microplastic pollution on marine turtle nesting beaches in Cyprus	2018	Cyprus	35.2787	33.925		1	1							1					1						M
2018	Duncan et al	The true depth of the Mediterranean plastic problem: Extreme microplastic pollution on marine turtle nesting beaches in Cyprus	2018	Cyprus	35.1681	33.9094		1	1							1					1						M
2018	Eo et al	Abundance, composition, and distribution of microplastics larger than 20 mm in sand beaches of South Korea	2018	South Korea	29.6501	-85.16		1	1												1						M
2018	Eo et al	Abundance, composition, and distribution of microplastics larger than 20 mm in sand beaches of South Korea	2018	South Korea	37.2893	126.576		1	1												1						M
2018	Eo et al	Abundance, composition, and distribution of microplastics larger than 20 mm in sand beaches of South Korea	2018	South Korea	36.8466	126.195		1	1												1						M
2018	Eo et al	Abundance, composition, and distribution of microplastics larger than 20 mm in sand beaches of South Korea	2018	South Korea	36.3126	126.511		1	1												1						M
2018	Eo et al	Abundance, composition, and distribution of microplastics larger than 20 mm in sand beaches of South Korea	2018	South Korea	35.6972	126.554		1	1												1						M
2018	Eo et al	Abundance, composition, and distribution of microplastics larger than 20 mm in sand beaches of South Korea	2018	South Korea	35.0955	126.056		1	1												1						M
2018	Eo et al	Abundance, composition, and distribution of microplastics larger than 20 mm in sand beaches of South Korea	2018	South Korea	34.4708	126.469		1	1												1						M
2018	Eo et al	Abundance, composition, and distribution of microplastics larger than 20 mm in sand beaches of South Korea	2018	South Korea	34.5894	127.496		1	1												1						M
2018	Eo et al	Abundance, composition, and distribution of microplastics larger than 20 mm in sand beaches of South Korea	2018	South Korea	34.7939	127.755		1	1												1						M
2018	Eo et al	Abundance, composition, and distribution of microplastics larger than 20 mm in sand beaches of South Korea	2018	South Korea	34.9267	128.096		1	1												1						M
2018	Eo et al	Abundance, composition, and distribution of microplastics larger than 20 mm in sand beaches of South Korea	2018	South Korea	34.8167	128.439		1	1												1						M
2018	Eo et al	Abundance, composition, and distribution of microplastics larger than 20 mm in sand beaches of South Korea	2018	South Korea	34.9648	128.712		1	1												1						M
2018	Eo et al	Abundance, composition, and distribution of microplastics larger than 20 mm in sand beaches of South Korea	2018	South Korea	34.959	128.715		1	1												1						M
2018	Eo et al	Abundance, composition, and distribution of microplastics larger than 20 mm in sand beaches of South Korea	2018	South Korea	34.8092	128.69		1	1												1						M
2018	Eo et al	Abundance, composition, and distribution of microplastics larger than 20 mm in sand beaches of South Korea	2018	South Korea	34.7228	128.588		1	1												1						M
2018	Eo et al	Abundance, composition, and distribution of microplastics larger than 20 mm in sand beaches of South Korea	2018	South Korea	35.3814	129.345		1	1												1						M
2018	Eo et al	Abundance, composition, and distribution of microplastics larger than 20 mm in sand beaches of South Korea	2018	South Korea	36.1273	129.406		1	1												1						M
2018	Eo et al	Abundance, composition, and distribution of microplastics larger than 20 mm in sand beaches of South Korea	2018	South Korea	37.0475	129.413		1	1												1						M
2018	Eo et al	Abundance, composition, and distribution of microplastics larger than 20 mm in sand beaches of South Korea	2018	South Korea	37.4697	129.168		1	1												1						M
2018	Eo et al	Abundance, composition, and distribution of microplastics larger than 20 mm in sand beaches of South Korea	2018	South Korea	38.2367	128.579		1	1												1						M
2017	Fisner et al	Quantifying microplastic pollution on sandy beaches: the conundrum of large sample variability and spatial heterogeneity	2017	Santos Bay, Sao Paulo State, Brazil	-23.9764	-46.3175		1	1												1						M
2015	Fok and Cheung	Hong Kong at the Pearl River Estuary: A hotspot of microplastic pollution	2015	Ap Tsai Hang, Hong Kong	22.4389	113.948		1	1							1					1						M
2015	Fok and Cheung	Hong Kong at the Pearl River Estuary: A hotspot of microplastic pollution	2015	Ha Pak Lai, Hong Kong	22.4247	113.941		1	1							1					1						M
2015	Fok and Cheung	Hong Kong at the Pearl River Estuary: A hotspot of microplastic pollution	2015	Tung Lung Chau, Hong Kong	22.2482	114.29		1	1							1					1						M
2015	Fok and Cheung	Hong Kong at the Pearl River Estuary: A hotspot of microplastic pollution	2015	Long Ke Wan, Hong Kong	22.3743	114.376		1	1							1					1						M
2015	Fok and Cheung	Hong Kong at the Pearl River Estuary: A hotspot of microplastic pollution	2015	Nam Fung Wan, Hong Kong	22.3761	114.334		1	1							1					1						M
2015	Fok and Cheung	Hong Kong at the Pearl River Estuary: A hotspot of microplastic pollution	2015	San Shek Wan, Hong Kong	22.2816	113.896		1	1							1					1						M
2015	Fok and Cheung	Hong Kong at the Pearl River Estuary: A hotspot of microplastic pollution	2015	Sharp Island, Hong Kong	22.3632	114.294		1	1							1					1						M
2015	Fok and Cheung	Hong Kong at the Pearl River Estuary: A hotspot of microplastic pollution	2015	Pak Shui Wun, Hong Kong	22.3413	114.266		1	1							1					1						M
2015	Fok and Cheung	Hong Kong at the Pearl River Estuary: A hotspot of microplastic pollution	2015	Fan Lau Tung Wan, Hong Kong	22.1998	113.86		1	1							1					1						M
2015	Fok and Cheung	Hong Kong at the Pearl River Estuary: A hotspot of microplastic pollution	2015	Cheung Chau, Hong Kong	22.2017	114.026		1	1							1					1						M
2015	Fok and Cheung	Hong Kong at the Pearl River Estuary: A hotspot of microplastic pollution	2015	Shek Pai Wan, Hong Kong	22.2468	114.149		1	1							1					1						M
2015	Fok and Cheung	Hong Kong at the Pearl River Estuary: A hotspot of microplastic pollution	2015	Shek O Wan, Hong Kong	22.2286	114.251		1	1							1					1						M
2015	Fok and Cheung	Hong Kong at the Pearl River Estuary: A hotspot of microplastic pollution	2015	Cheung Sha, Hong Kong	22.3357	114.151		1	1							1					1						M
2015	Fok and Cheung	Hong Kong at the Pearl River Estuary: A hotspot of microplastic pollution	2015	Stanley Ma Hang, Hong Kong	22.2175	114.208		1	1							1					1						M
2015	Fok and Cheung	Hong Kong at the Pearl River Estuary: A hotspot of microplastic pollution	2015	Peng Chau, Hong Kong	22.2831	114.041		1	1							1					1						M
2015	Fok and Cheung	Hong Kong at the Pearl River Estuary: A hotspot of microplastic pollution	2015	Ma Shi Chau, Hong Kong	22.4551	114.23		1	1							1					1						M
2015	Fok and Cheung	Hong Kong at the Pearl River Estuary: A hotspot of microplastic pollution	2015	Pak Shek, Hong Kong	22.4282	114.208		1	1							1					1						M
2015	Fok and Cheung	Hong Kong at the Pearl River Estuary: A hotspot of microplastic pollution	2015	Lai Chi CHong, Hong Kong	22.4516	114.301		1	1							1					1						M
2015	Fok and Cheung	Hong Kong at the Pearl River Estuary: A hotspot of microplastic pollution	2015	Ma Wan Pak Wan, Hong Kong	22.3554	114.062		1	1							1					1						M
2015	Fok and Cheung	Hong Kong at the Pearl River Estuary: A hotspot of microplastic pollution	2015	Lei Yue Mun, Hong Kong	22.2848	114.238		1	1							1					1						M
2015	Fok and Cheung	Hong Kong at the Pearl River Estuary: A hotspot of microplastic pollution	2015	Nam Fung Wan, Hong Kong	22.3761	114.334		1	1							1					1						M
2015	Fok and Cheung	Hong Kong at the Pearl River Estuary: A hotspot of microplastic pollution	2015	Tung O Wan, Hong Kong	22.1956	114.155		1	1							1					1						M
2015	Fok and Cheung	Hong Kong at the Pearl River Estuary: A hotspot of microplastic pollution	2015	Nam She Wan, Hong Kong	22.4371	114.371		1	1							1					1						M
2015	Fok and Cheung	Hong Kong at the Pearl River Estuary: A hotspot of microplastic pollution	2015	Tai Long Sai Wan, Hong Kong	22.3989	114.37		1	1							1					1						M
2015	Fok and Cheung	Hong Kong at the Pearl River Estuary: A hotspot of microplastic pollution	2015	Lung Kwu Tan, Hong Kong	22.3893	113.92		1	1							1					1						M
2015	Fok and Cheung	Hong Kong at the Pearl River Estuary: A hotspot of microplastic pollution	2015	Tsing Lung Garden, Hong Kong	22.3659	113.997		1	1							1					1						M
2017	Fok et al	Size distribution of stranded small plastic debris on the coast of Guangdong, South China	2017	Shangchuan Island, Jiangmen, South China	21.7088	112.806		1	1							1					1						M
2017	Fok et al	Size distribution of stranded small plastic debris on the coast of Guangdong, South China	2017	Chixi, Jiangmen, South China	21.9258	112.855		1	1							1					1						M
2017	Fok et al	Size distribution of stranded small plastic debris on the coast of Guangdong, South China	2017	Gaolan Island, Guangdong, South China	22.0844	113.541		1	1							1					1						M
2017	Fok et al	Size distribution of stranded small plastic debris on the coast of Guangdong, South China	2017	Qi'ao Island, Guangdong, South China	22.4361	113.654		1	1							1					1						M
2017	Fok et al	Size distribution of stranded small plastic debris on the coast of Guangdong, South China	2017	Dongchong, Guangdong, South China	22.2367	114.196		1	1							1					1						M
2017	Fok et al	Size distribution of stranded small plastic debris on the coast of Guangdong, South China	2017	Pinghai Bay, Guangdong, South China	22.4919	114.58		1	1							1					1						M
2017	Fok et al	Size distribution of stranded small plastic debris on the coast of Guangdong, South China	2017	Red Bay, Guangdong, South China	22.6874	115.509		1	1							1					1						M
2010	Frias et al	Organic pollutants in microplastics from two beaches of the Portuguese coast	2010	Cresmina, Portugal	38.7256	-9.47669		1	1							1					1						M
2010	Frias et al	Organic pollutants in microplastics from two beaches of the Portuguese coast	2010	Fonte de Telha, Portugal	38.571	-9.19586		1	1							1					1						M
2017	Lots et al	A large-scale investigation of microplastic contamination: Abundance and characteristics of microplastics in European beach sediment	2017	Bosnia	42.92	17.62		1	1							1					1						M
2017	Lots et al	A large-scale investigation of microplastic contamination: Abundance and characteristics of microplastics in European beach sediment	2017	Kalundberg, Denmark	55.69	11.09		1	1							1					1						M
2017	Lots et al	A large-scale investigation of microplastic contamination: Abundance and characteristics of microplastics in European beach sediment	2017	Fyns Hoved, Denmark	55.61	10.59		1	1							1					1						M
2017	Lots et al	A large-scale investigation of microplastic contamination: Abundance and characteristics of microplastics in European beach sediment	2017	Bjerge Nord, Denmark	55.59	11.15		1	1							1					1						M
2017	Lots et al	A large-scale investigation of microplastic contamination: Abundance and characteristics of microplastics in European beach sediment	2017	Klaipeda, Lithuania	55.7	21.14		1	1							1					1						M
2017	Lots et al	A large-scale investigation of microplastic contamination: Abundance and characteristics of microplastics in European beach sediment	2017	Normandy, France	44.39	-0.89		1	1							1					1						M
2017	Lots et al	A large-scale investigation of microplastic contamination: Abundance and characteristics of microplastics in European beach sediment	2017	Pilion, Greece	39.44	23.05		1	1							1					1						M
2017	Lots et al	A large-scale investigation of microplastic contamination: Abundance and characteristics of microplastics in European beach sediment	2017	Vik, Iceland	63.26	-19		1	1							1					1						M
2017	Lots et al	A large-scale investigation of microplastic contamination: Abundance and characteristics of microplastics in European beach sediment	2017	Tel Aviv, Isreal	32.11	34.86		1	1							1					1						M
2017	Lots et al	A large-scale investigation of microplastic contamination: Abundance and characteristics of microplastics in European beach sediment	2017	Sicily, Italy	36.76	15.1		1	1							1					1						M
2017	Lots et al	A large-scale investigation of microplastic contamination: Abundance and characteristics of microplastics in European beach sediment	2017	Lido di Dante, Italy	44.38	12.32		1	1							1					1						M
2017	Lots et al	A large-scale investigation of microplastic contamination: Abundance and characteristics of microplastics in European beach sediment	2017	Tromso, Norway	69.78	18.54		1	1							1					1						M
2017	Lots et al	A large-scale investigation of microplastic contamination: Abundance and characteristics of microplastics in European beach sediment	2017	Smola, Norway	63.29	8.14		1	1							1					1						M
2017	Lots et al	A large-scale investigation of microplastic contamination: Abundance and characteristics of microplastics in European beach sediment	2017	Drobak, Norway	59.64	10.64		1	1							1					1						M
2017	Lots et al	A large-scale investigation of microplastic contamination: Abundance and characteristics of microplastics in European beach sediment	2017	Porto, Portugal	41.18	-8.69		1	1							1					1						M
2017	Lots et al	A large-scale investigation of microplastic contamination: Abundance and characteristics of microplastics in European beach sediment	2017	Madeira, Portugal	33.05	-16.34		1	1							1					1						M
2017	Lots et al	A large-scale investigation of microplastic contamination: Abundance and characteristics of microplastics in European beach sediment	2017	Barcelona, Spain	41.4	2.21		1	1							1					1						M
2017	Lots et al	A large-scale investigation of microplastic contamination: Abundance and characteristics of microplastics in European beach sediment	2017	Denia, Spain	38.84	0.11		1	1							1					1						M
2017	Lots et al	A large-scale investigation of microplastic contamination: Abundance and characteristics of microplastics in European beach sediment	2017	Rottumeroog, the Netherlands	53.54	6.61		1	1							1					1						M
2017	Lots et al	A large-scale investigation of microplastic contamination: Abundance and characteristics of microplastics in European beach sediment	2017	Dikili, Turkey	39.07	26.89		1	1							1					1						M
2017	Lots et al	A large-scale investigation of microplastic contamination: Abundance and characteristics of microplastics in European beach sediment	2017	Cassis, France	43.21	5.54		1	1							1					1						M
2017	Lots et al	A large-scale investigation of microplastic contamination: Abundance and characteristics of microplastics in European beach sediment	2017	Normandy, France	50	1.39		1	1							1					1						M
2017	Lots et al	A large-scale investigation of microplastic contamination: Abundance and characteristics of microplastics in European beach sediment	2017	San Mauro, Italy	44.17	12.44		1	1							1					1						M
2018	Hengstmann et al	Microplastic in beach sediments of the Isle of Rügen (Baltic Sea) - Implementing a novel glass elutriation column	2018	Dranske W, Germany	54.6596	13.25		1	1							1					1						M
2018	Hengstmann et al	Microplastic in beach sediments of the Isle of Rügen (Baltic Sea) - Implementing a novel glass elutriation column	2018	Varnkevitz, Germany	54.6822	13.3719		1	1							1					1						M
2018	Hengstmann et al	Microplastic in beach sediments of the Isle of Rügen (Baltic Sea) - Implementing a novel glass elutriation column	2018	Varnkevitz, Germany	54.6823	13.3725		1	1							1					1						M
2018	Hengstmann et al	Microplastic in beach sediments of the Isle of Rügen (Baltic Sea) - Implementing a novel glass elutriation column	2018	Vitt, Germany	54.6655	13.4324		1	1							1					1						M
2018	Herrera et al	Microplastic and tar pollution on three Canary Islands beaches: An annual study	2018	Lambra Beach, Canary Islands	29.2669	-13.4835		1		1	1	1		1		1					1						M
2018	Herrera et al	Microplastic and tar pollution on three Canary Islands beaches: An annual study	2018	Famara Beach, Canary Islands	29.1003	13.5501		1		1	1	1		1		1					1						M
2018	Herrera et al	Microplastic and tar pollution on three Canary Islands beaches: An annual study	2018	Las Canteras Beach, Canary Islands	28.1169	15.4335		1		1	1	1		1		1					1						M
2019	Horn et al	Microplastics are ubiquitous on California beaches and enter the coastal food web through consumption by Pacific mole crabs	2019	Rodeo Beach, California, USA	37.8308	-122.537		1	1							1					1						M
2019	Horn et al	Microplastics are ubiquitous on California beaches and enter the coastal food web through consumption by Pacific mole crabs	2019	Baker Beach, California, USA	37.7912	-122.485		1	1							1					1						M
2019	Horn et al	Microplastics are ubiquitous on California beaches and enter the coastal food web through consumption by Pacific mole crabs	2019	Pescadero, California, USA	37.2644	-122.413		1	1							1					1						M
2019	Horn et al	Microplastics are ubiquitous on California beaches and enter the coastal food web through consumption by Pacific mole crabs	2019	Davenport Landing, California, USA	37.0248	-122.216		1	1							1					1						M
2019	Horn et al	Microplastics are ubiquitous on California beaches and enter the coastal food web through consumption by Pacific mole crabs	2019	Nat Bridges, California, USA	36.9502	-122.058		1	1							1					1						M
2019	Horn et al	Microplastics are ubiquitous on California beaches and enter the coastal food web through consumption by Pacific mole crabs	2019	Cowells, California, USA	36.9618	-122.024		1	1							1					1						M
2019	Horn et al	Microplastics are ubiquitous on California beaches and enter the coastal food web through consumption by Pacific mole crabs	2019	Tide Ave, California, USA	36.6049	-121.869		1	1							1					1						M
2019	Horn et al	Microplastics are ubiquitous on California beaches and enter the coastal food web through consumption by Pacific mole crabs	2019	Monterey, California, USA	36.6183	-121.849		1	1							1					1						M
2019	Horn et al	Microplastics are ubiquitous on California beaches and enter the coastal food web through consumption by Pacific mole crabs	2019	Carmel, California, USA	36.5554	-121.931		1	1							1					1						M
2019	Horn et al	Microplastics are ubiquitous on California beaches and enter the coastal food web through consumption by Pacific mole crabs	2019	Avila, California, USA	35.1793	-120.737		1	1							1					1						M
2019	Horn et al	Microplastics are ubiquitous on California beaches and enter the coastal food web through consumption by Pacific mole crabs	2019	Pismo, California, USA	35.1383	-120.643		1	1							1					1						M
2019	Horn et al	Microplastics are ubiquitous on California beaches and enter the coastal food web through consumption by Pacific mole crabs	2019	Grover, California, USA	35.1218	-120.636		1	1							1					1						M
2019	Horn et al	Microplastics are ubiquitous on California beaches and enter the coastal food web through consumption by Pacific mole crabs	2019	Gaviota, California, USA	34.4717	-120.215		1	1							1					1						M
2019	Horn et al	Microplastics are ubiquitous on California beaches and enter the coastal food web through consumption by Pacific mole crabs	2019	El Capitan, California, USA	34.4616	-120.025		1	1							1					1						M
2019	Horn et al	Microplastics are ubiquitous on California beaches and enter the coastal food web through consumption by Pacific mole crabs	2019	Goleta, California, USA	34.4168	-119.832		1	1							1					1						M
2019	Horn et al	Microplastics are ubiquitous on California beaches and enter the coastal food web through consumption by Pacific mole crabs	2019	East Beach, California, USA	34.4153	-119.676		1	1							1					1						M
2019	Horn et al	Microplastics are ubiquitous on California beaches and enter the coastal food web through consumption by Pacific mole crabs	2019	West Beach, California, USA	34.4102	-119.69		1	1							1					1						M
2019	Horn et al	Microplastics are ubiquitous on California beaches and enter the coastal food web through consumption by Pacific mole crabs	2019	Leadbetter, California, USA	34.4024	-119.699		1	1							1					1						M
2019	Horn et al	Microplastics are ubiquitous on California beaches and enter the coastal food web through consumption by Pacific mole crabs	2019	Carpinteria, California, USA	34.3931	-119.524		1	1							1					1						M
2019	Horn et al	Microplastics are ubiquitous on California beaches and enter the coastal food web through consumption by Pacific mole crabs	2019	Rincon, California, USA	34.3388	-119.413		1	1							1					1						M
2019	Horn et al	Microplastics are ubiquitous on California beaches and enter the coastal food web through consumption by Pacific mole crabs	2019	Hobson, California, USA	34.3379	-119.412		1	1							1					1						M
2019	Horn et al	Microplastics are ubiquitous on California beaches and enter the coastal food web through consumption by Pacific mole crabs	2019	Ventura State, California, USA	34.2682	-119.277		1	1							1					1						M
2019	Horn et al	Microplastics are ubiquitous on California beaches and enter the coastal food web through consumption by Pacific mole crabs	2019	Marina Park, California, USA	34.2545	-119.268		1	1							1					1						M
2019	Horn et al	Microplastics are ubiquitous on California beaches and enter the coastal food web through consumption by Pacific mole crabs	2019	5th Street, California, USA	33.6578	-118.003		1	1							1					1						M
2019	Horn et al	Microplastics are ubiquitous on California beaches and enter the coastal food web through consumption by Pacific mole crabs	2019	Hollywood, California, USA	34.1589	-119.228		1	1							1					1						M
2019	Horn et al	Microplastics are ubiquitous on California beaches and enter the coastal food web through consumption by Pacific mole crabs	2019	Silverstrand, California, USA	34.1573	-119.225		1	1							1					1						M
2019	Horn et al	Microplastics are ubiquitous on California beaches and enter the coastal food web through consumption by Pacific mole crabs	2019	Solimar, California, USA	34.3088	-119.354		1	1							1					1						M
2019	Horn et al	Microplastics are ubiquitous on California beaches and enter the coastal food web through consumption by Pacific mole crabs	2019	Pt. Mugu, California, USA	34.1131	-119.103		1	1							1					1						M
2019	Horn et al	Microplastics are ubiquitous on California beaches and enter the coastal food web through consumption by Pacific mole crabs	2019	Sycamore, California, USA	34.0698	-119.012		1	1							1					1						M
2019	Horn et al	Microplastics are ubiquitous on California beaches and enter the coastal food web through consumption by Pacific mole crabs	2019	Bechers Bay, California, USA	33.9891	-119.983		1	1							1					1						M
2019	Horn et al	Microplastics are ubiquitous on California beaches and enter the coastal food web through consumption by Pacific mole crabs	2019	Water Canyon, California, USA	33.9936	-120.04		1	1							1					1						M
2019	Horn et al	Microplastics are ubiquitous on California beaches and enter the coastal food web through consumption by Pacific mole crabs	2019	Arlington, California, USA	34.0063	-120.177		1	1							1					1						M
2019	Horn et al	Microplastics are ubiquitous on California beaches and enter the coastal food web through consumption by Pacific mole crabs	2019	Cluster Pt, California, USA	33.9251	-120.18		1	1							1					1						M
2019	Horn et al	Microplastics are ubiquitous on California beaches and enter the coastal food web through consumption by Pacific mole crabs	2019	Sandy Pt, California, USA	34.0018	-120.249		1	1							1					1						M
2019	Horn et al	Microplastics are ubiquitous on California beaches and enter the coastal food web through consumption by Pacific mole crabs	2019	Skunk Pt, California, USA	33.9711	-119.971		1	1							1					1						M
2019	Horn et al	Microplastics are ubiquitous on California beaches and enter the coastal food web through consumption by Pacific mole crabs	2019	Scorpion, California, USA	34.0411	-119.581		1	1							1					1						M
2019	Horn et al	Microplastics are ubiquitous on California beaches and enter the coastal food web through consumption by Pacific mole crabs	2019	Sauces, California, USA	34.0122	-119.882		1	1							1					1						M
2019	Horn et al	Microplastics are ubiquitous on California beaches and enter the coastal food web through consumption by Pacific mole crabs	2019	Deer Creek, California, USA	34.0621	-118.986		1	1							1					1						M
2019	Horn et al	Microplastics are ubiquitous on California beaches and enter the coastal food web through consumption by Pacific mole crabs	2019	County Line, California, USA	34.0527	-118.962		1	1							1					1						M
2019	Horn et al	Microplastics are ubiquitous on California beaches and enter the coastal food web through consumption by Pacific mole crabs	2019	El Matador, California, USA	34.0381	-118.875		1	1							1					1						M
2019	Horn et al	Microplastics are ubiquitous on California beaches and enter the coastal food web through consumption by Pacific mole crabs	2019	Leo Carillo, California, USA	34.0437	-118.936		1	1							1					1						M
2019	Horn et al	Microplastics are ubiquitous on California beaches and enter the coastal food web through consumption by Pacific mole crabs	2019	Zuma, California, USA	34.0219	-118.831		1	1							1					1						M
2019	Horn et al	Microplastics are ubiquitous on California beaches and enter the coastal food web through consumption by Pacific mole crabs	2019	Paradise Cove, California, USA	34.0205	-118.787		1	1							1					1						M
2019	Horn et al	Microplastics are ubiquitous on California beaches and enter the coastal food web through consumption by Pacific mole crabs	2019	Malibu Lagoon, California, USA	34.0339	-118.68		1	1							1					1						M
2019	Horn et al	Microplastics are ubiquitous on California beaches and enter the coastal food web through consumption by Pacific mole crabs	2019	Santa Monica, California, USA	34.0126	-118.5		1	1							1					1						M
2019	Horn et al	Microplastics are ubiquitous on California beaches and enter the coastal food web through consumption by Pacific mole crabs	2019	Manhattan, California, USA	33.8844	-118.412		1	1							1					1						M
2019	Horn et al	Microplastics are ubiquitous on California beaches and enter the coastal food web through consumption by Pacific mole crabs	2019	Huntington, California, USA	33.6381	-117.974		1	1							1					1						M
2019	Horn et al	Microplastics are ubiquitous on California beaches and enter the coastal food web through consumption by Pacific mole crabs	2019	Crystal Cove, California, USA	33.5742	-117.841		1	1							1					1						M
2019	Horn et al	Microplastics are ubiquitous on California beaches and enter the coastal food web through consumption by Pacific mole crabs	2019	Aliso, California, USA	33.5095	-117.752		1	1							1					1						M
2019	Horn et al	Microplastics are ubiquitous on California beaches and enter the coastal food web through consumption by Pacific mole crabs	2019	Mission Beach, California, USA	32.7681	-117.252		1	1							1					1						M
2019	Horn et al	Microplastics are ubiquitous on California beaches and enter the coastal food web through consumption by Pacific mole crabs	2019	San Onofre, California, USA	33.3762	-117.569		1	1							1					1						M
2009	Ivar do Sul et al	Here, there and everywhere. Small plastic fragments and pellets on beaches of Fernando de Noronha (Equatorial Western Atlantic)	2009	Porto, Fernando de Noronha, Brazil	-3.83441	-32.4014		1	1							1					1						M
2009	Ivar do Sul et al	Here, there and everywhere. Small plastic fragments and pellets on beaches of Fernando de Noronha (Equatorial Western Atlantic)	2009	Meio, Brazil	-3.83993	-32.4134		1						1		1					1						M
2009	Ivar do Sul et al	Here, there and everywhere. Small plastic fragments and pellets on beaches of Fernando de Noronha (Equatorial Western Atlantic)	2009	Boldro, Brazil	-3.84487	-32.4278		1	1							1					1						M
2009	Ivar do Sul et al	Here, there and everywhere. Small plastic fragments and pellets on beaches of Fernando de Noronha (Equatorial Western Atlantic)	2009	Bode, Brazil	-3.84775	-32.4346		1	1							1					1						M
2009	Ivar do Sul et al	Here, there and everywhere. Small plastic fragments and pellets on beaches of Fernando de Noronha (Equatorial Western Atlantic)	2009	Cacimba do Padre, Brazil	-3.84952	-32.4386		1	1							1					1						M
2009	Ivar do Sul et al	Here, there and everywhere. Small plastic fragments and pellets on beaches of Fernando de Noronha (Equatorial Western Atlantic)	2009	Sancho, Brazil	-3.85466	-32.4437		1	1							1					1						M
2009	Ivar do Sul et al	Here, there and everywhere. Small plastic fragments and pellets on beaches of Fernando de Noronha (Equatorial Western Atlantic)	2009	Leao, Brazil	-3.87004	-32.4372		1						1		1					1						M
2009	Ivar do Sul et al	Here, there and everywhere. Small plastic fragments and pellets on beaches of Fernando de Noronha (Equatorial Western Atlantic)	2009	Sueste, Brazil	-3.86595	-32.4249		1						1		1					1						M
2009	Ivar do Sul et al	Here, there and everywhere. Small plastic fragments and pellets on beaches of Fernando de Noronha (Equatorial Western Atlantic)	2009	Atalaia, Brazil	-3.8568	-32.4086		1	1							1					1						M
2009	Ivar do Sul et al	Here, there and everywhere. Small plastic fragments and pellets on beaches of Fernando de Noronha (Equatorial Western Atlantic)	2009	Caieira, Brazil	-3.83761	-32.4002		1						1		1					1						M
2009	Ivar do Sul et al	Here, there and everywhere. Small plastic fragments and pellets on beaches of Fernando de Noronha (Equatorial Western Atlantic)	2009	Air France, Brazil	-3.83094	-32.3989		1	1							1					1						M
2018	Jasna et al	Levels of trace metals on microplastic particles in beach sediments of the island of Vis, Adriatic Sea, Croatia	2018	Zaglav, Island of Vis, Croatia	43.0326	16.2287		1			0.5			1							1						M
2018	Jasna et al	Levels of trace metals on microplastic particles in beach sediments of the island of Vis, Adriatic Sea, Croatia	2018	Milna, Croatia	43.0404	16.2306		1			0.5			1							1						M
2014	Juan et al	Protected areas in the Atlantic facing the hazards of micro-plastic pollution: First diagnosis of three islands in the Canary Current	2014	La Graciosa, Canary Islands	29.256	-13.5032		1	1							1		1			1						M
2014	Juan et al	Protected areas in the Atlantic facing the hazards of micro-plastic pollution: First diagnosis of three islands in the Canary Current	2014	Lanzarote, Canary Islands	29.0471	-13.5902		1	1							1		1			1						M
2014	Juan et al	Protected areas in the Atlantic facing the hazards of micro-plastic pollution: First diagnosis of three islands in the Canary Current	2014	Fuerteventure, Canary Islands	28.3588	-14.0532		1	1							1		1			1						M
2015	Kim et al	Factors Influencing the Spatial Variation of Microplastics on High-Tidal Coastal Beaches in Korea	2015	Soya Island, Korea	37.2227	126.161		1	1							1					1						M
2015	Kim et al	Factors Influencing the Spatial Variation of Microplastics on High-Tidal Coastal Beaches in Korea	2015	Soya Island, Korea	37.212	126.176		1	1							1					1						M
2015	Kim et al	Factors Influencing the Spatial Variation of Microplastics on High-Tidal Coastal Beaches in Korea	2015	Soya Island, Korea	37.2097	126.18		1	1							1					1						M
2016	Kunz et al	Distribution and quantity of microplastic on sandy beaches along the northern coast of Taiwan	2016	Shulan Beach, North Taiwan	25.1888	121.414		1	1												1						M
2016	Kunz et al	Distribution and quantity of microplastic on sandy beaches along the northern coast of Taiwan	2016	Baishawan Beach, North Taiwan	25.2846	121.516		1	1												1						M
2016	Kunz et al	Distribution and quantity of microplastic on sandy beaches along the northern coast of Taiwan	2016	Waimushan Beach, North Taiwan	25.165	121.707		1	1												1						M
2016	Kunz et al	Distribution and quantity of microplastic on sandy beaches along the northern coast of Taiwan	2016	Fulong Beach, North Taiwan	25.0241	121.942		1	1												1						M
2017	Lee et al	Characteristics of meso-sized plastic marine debris on 20 beaches in Korea	2017	Sokcho, South Korea	38.1906	128.604		1	1												1						M
2017	Lee et al	Characteristics of meso-sized plastic marine debris on 20 beaches in Korea	2017	Gangneung, South Korea	37.8055	128.908		1	1												1						M
2017	Lee et al	Characteristics of meso-sized plastic marine debris on 20 beaches in Korea	2017	Uljin, South Korea	36.8877	129.361		1	1												1						M
2017	Lee et al	Characteristics of meso-sized plastic marine debris on 20 beaches in Korea	2017	Pohang, South Korea	36.0934	129.354		1	1												1						M
2017	Lee et al	Characteristics of meso-sized plastic marine debris on 20 beaches in Korea	2017	Busan, South Korea	35.1611	129.048		1	1												1						M
2017	Lee et al	Characteristics of meso-sized plastic marine debris on 20 beaches in Korea	2017	Heungnam, South Korea	39.8197	127.67		1	1												1						M
2017	Lee et al	Characteristics of meso-sized plastic marine debris on 20 beaches in Korea	2017	Dukpo, South Korea	34.911	128.71		1	1												1						M
2017	Lee et al	Characteristics of meso-sized plastic marine debris on 20 beaches in Korea	2017	Waheon, South Korea	34.8018	128.715		1	1												1						M
2017	Lee et al	Characteristics of meso-sized plastic marine debris on 20 beaches in Korea	2017	Myungsa, South Korea	34.7261	128.603		1	1												1						M
2017	Lee et al	Characteristics of meso-sized plastic marine debris on 20 beaches in Korea	2017	Tongyeong, South Korea	34.8243	128.44		1	1												1						M
2017	Lee et al	Characteristics of meso-sized plastic marine debris on 20 beaches in Korea	2017	Goseong, South Korea	34.8243	128.44		1	1												1						M
2017	Lee et al	Characteristics of meso-sized plastic marine debris on 20 beaches in Korea	2017	Yeosu, South Korea	34.7604	127.662		1	1												1						M
2017	Lee et al	Characteristics of meso-sized plastic marine debris on 20 beaches in Korea	2017	Goheung, South Korea	34.6137	127.283		1	1												1						M
2017	Lee et al	Characteristics of meso-sized plastic marine debris on 20 beaches in Korea	2017	Haenam, South Korea	34.5744	126.598		1	1												1						M
2017	Lee et al	Characteristics of meso-sized plastic marine debris on 20 beaches in Korea	2017	Shinan, South Korea	34.8274	126.101		1	1												1						M
2017	Lee et al	Characteristics of meso-sized plastic marine debris on 20 beaches in Korea	2017	Buan, South Korea	35.7319	126.734		1	1												1						M
2017	Lee et al	Characteristics of meso-sized plastic marine debris on 20 beaches in Korea	2017	Boryeong, South Korea	36.3358	126.613		1	1												1						M
2017	Lee et al	Characteristics of meso-sized plastic marine debris on 20 beaches in Korea	2017	Taean, South Korea	36.7471	126.298		1	1												1						M
2017	Lee et al	Characteristics of meso-sized plastic marine debris on 20 beaches in Korea	2017	Ansan, South Korea	37.3219	126.831		1	1												1						M
2017	Lee et al	Characteristics of meso-sized plastic marine debris on 20 beaches in Korea	2017	Incheon, South Korea	37.4559	126.706		1	1												1						M
2018	Li et al	Characterization, source, and retention of microplastic in sandy beaches and mangrove wetlands of the Qinzhou Bay, China	2018	Qinzhou Bay, China	21.619	108.767		1	1												1						M
2018	Li et al	Characterization, source, and retention of microplastic in sandy beaches and mangrove wetlands of the Qinzhou Bay, China	2018	Qinzhou Bay, China	21.6466	108.724		1	1												1						M
2018	Li et al	Characterization, source, and retention of microplastic in sandy beaches and mangrove wetlands of the Qinzhou Bay, China	2018	Qinzhou Bay, China	21.8567	108.592		1	1												1						M
2018	Li et al	Characterization, source, and retention of microplastic in sandy beaches and mangrove wetlands of the Qinzhou Bay, China	2018	Qinzhou Bay, China	21.6469	108.724		1	1												1						M
2018	Li et al	Characterization, source, and retention of microplastic in sandy beaches and mangrove wetlands of the Qinzhou Bay, China	2018	Qinzhou Bay, China	21.7039	108.699		1	1												1						M
2018	Li et al	Characterization, source, and retention of microplastic in sandy beaches and mangrove wetlands of the Qinzhou Bay, China	2018	Qinzhou Bay, China	21.7392	108.59		1	1												1						M
2018	Li et al	Characterization, source, and retention of microplastic in sandy beaches and mangrove wetlands of the Qinzhou Bay, China	2018	Qinzhou Bay, China	21.8439	108.611		1	1												1						M
2018	Li et al	Characterization, source, and retention of microplastic in sandy beaches and mangrove wetlands of the Qinzhou Bay, China	2018	Qinzhou Bay, China	21.8527	108.495		1	1												1						M
2018	Li et al	Characterization, source, and retention of microplastic in sandy beaches and mangrove wetlands of the Qinzhou Bay, China	2018	Qinzhou Bay, China	21.8884	108.566		1	1												1						M
2018	Li et al	Characterization, source, and retention of microplastic in sandy beaches and mangrove wetlands of the Qinzhou Bay, China	2018	Qinzhou Bay, China	21.8302	108.486		1	1												1						M
2018	Li et al	Characterization, source, and retention of microplastic in sandy beaches and mangrove wetlands of the Qinzhou Bay, China	2018	Qinzhou Bay, China	21.8101	108.587		1	1												1						M
2018	Li et al	Characterization, source, and retention of microplastic in sandy beaches and mangrove wetlands of the Qinzhou Bay, China	2018	Qinzhou Bay, China	21.7046	108.697		1	1												1						M
2018	Li et al	Characterization, source, and retention of microplastic in sandy beaches and mangrove wetlands of the Qinzhou Bay, China	2018	Qinzhou Bay, China	21.7385	108.59		1	1												1						M
2018	Li et al	Characterization, source, and retention of microplastic in sandy beaches and mangrove wetlands of the Qinzhou Bay, China	2018	Qinzhou Bay, China	21.8526	108.494		1	1												1						M
2018	Li et al	Characterization, source, and retention of microplastic in sandy beaches and mangrove wetlands of the Qinzhou Bay, China	2018	Qinzhou Bay, China	21.889	108.566		1	1												1						M
2018	Li et al	Characterization, source, and retention of microplastic in sandy beaches and mangrove wetlands of the Qinzhou Bay, China	2018	Qinzhou Bay, China	21.8301	108.485		1	1												1						M
2018	Li et al	Characterization, source, and retention of microplastic in sandy beaches and mangrove wetlands of the Qinzhou Bay, China	2018	Qinzhou Bay, China	21.8104	108.589		1	1												1						M
2012	Liebezeit and Dubaish	Microplastics in Beaches of the East Frisian Islands Spiekeroog and Kachelotplate	2012	Spiekeroog, East Frisian Islands, Germany	53.7746	7.74853		1	1									1			1						M
2012	Liebezeit and Dubaish	Microplastics in Beaches of the East Frisian Islands Spiekeroog and Kachelotplate	2012	Kachelotplate, East Frisian Islands, Germany	53.6424	6.83227		1	1									1			1						M
2016	Lozoya et al	Plastics and microplastics on recreational beaches in Punta del Este (Uruguay): Unseen critical residents?	2016	Punta del Este, Uruguay	-34.9667	-54.95		1	1							1		1			1						M
2004	McDermid and McMullen	Quantitative analysis of small-plastic debris on beaches in the Hawaiian archipelago	2004	Midway Atoll, Hawaii, USA	28.212	-177.387		1	1							1					1						M
2004	McDermid and McMullen	Quantitative analysis of small-plastic debris on beaches in the Hawaiian archipelago	2004	Midway Atoll, Hawaii, USA	28.2182	-177.377		1	1							1					1						M
2004	McDermid and McMullen	Quantitative analysis of small-plastic debris on beaches in the Hawaiian archipelago	2004	Midway Atoll, Hawaii, USA	28.2184	-177.372		1	1							1					1						M
2004	McDermid and McMullen	Quantitative analysis of small-plastic debris on beaches in the Hawaiian archipelago	2004	Midway Atoll, Hawaii, USA	28.2165	-177.368		1	1							1					1						M
2004	McDermid and McMullen	Quantitative analysis of small-plastic debris on beaches in the Hawaiian archipelago	2004	French Frigate Shoals, Hawaii, USA	23.869	-166.285		1	1							1					1						M
2004	McDermid and McMullen	Quantitative analysis of small-plastic debris on beaches in the Hawaiian archipelago	2004	Moloka'i, Hawaii, USA	21.1598	-156.713		1	1							1					1						M
2004	McDermid and McMullen	Quantitative analysis of small-plastic debris on beaches in the Hawaiian archipelago	2004	O'ahu, Hawaii, USA	21.3859	-158.151		1	1							1					1						M
2004	McDermid and McMullen	Quantitative analysis of small-plastic debris on beaches in the Hawaiian archipelago	2004	Hawai'I, USA	18.9322	-155.647		1	1							1					1						M
2004	McDermid and McMullen	Quantitative analysis of small-plastic debris on beaches in the Hawaiian archipelago	2004	Hawai'I, USA	20.1219	-155.597		1	1							1					1						M
2016	Moreira et al	Small-scale temporal and spatial variability in the abundance of plastic pellets on sandy beaches: Methodological considerations for estimating	2016	Pontal do Sul, Brazil	-25.5728	-48.3478		1					1	1		1					1						M
2016	Moreira et al	Revealing accumulation zones of plastic pellets in sandy beaches	2016	Fazenda, Brazil	-23.3661	-44.8343		1	1												1						M
2016	Moreira et al	Revealing accumulation zones of plastic pellets in sandy beaches	2016	Ubatumirim, Brazil	-23.3346	-44.9006		1	1												1						M
2016	Moreira et al	Revealing accumulation zones of plastic pellets in sandy beaches	2016	Prumirim, Brazil	-23.3779	-44.9651		1	1												1						M
2016	Moreira et al	Revealing accumulation zones of plastic pellets in sandy beaches	2016	Felix, Brazil	-23.3878	-44.9705		1	1												1						M
2016	Moreira et al	Revealing accumulation zones of plastic pellets in sandy beaches	2016	Itamambuca, Brazil	-23.4014	-45.0009		1	1												1						M
2016	Moreira et al	Revealing accumulation zones of plastic pellets in sandy beaches	2016	Vermelha do Sul, Brazil	-23.5097	-45.1734		1	1												1						M
2016	Moreira et al	Revealing accumulation zones of plastic pellets in sandy beaches	2016	Lagoinha, Brazil	-23.5198	-45.1982		1	1												1						M
2016	Moreira et al	Revealing accumulation zones of plastic pellets in sandy beaches	2016	Capricornia, Brazil	-23.617	-45.3539		1	1												1						M
2016	Moreira et al	Revealing accumulation zones of plastic pellets in sandy beaches	2016	Boraceia, Brazil	-23.7558	-45.8213		1	1												1						M
2016	Moreira et al	Revealing accumulation zones of plastic pellets in sandy beaches	2016	Itaguare, Brazil	-23.7946	-45.9933		1	1												1						M
2016	Moreira et al	Revealing accumulation zones of plastic pellets in sandy beaches	2016	Una, Brazil	-23.7657	-45.76		1	1												1						M
2016	Moreira et al	Revealing accumulation zones of plastic pellets in sandy beaches	2016	Jureia, Brazil	-23.7653	-45.788		1	1												1						M
2016	Moreira et al	Revealing accumulation zones of plastic pellets in sandy beaches	2016	Ilha Comprida, Brazil	-24.8462	-47.6883		1	1												1						M
2017	Munari et al	Plastic debris in the Mediterranean Sea: Types, occurrence and distribution along Adriatic shorelines	2017	Rosolina, Italy	45.1263	12.3271		1	1							1					1						M
2017	Munari et al	Plastic debris in the Mediterranean Sea: Types, occurrence and distribution along Adriatic shorelines	2017	Volano, Italy	44.8046	12.2752		1	1							1					1						M
2017	Munari et al	Plastic debris in the Mediterranean Sea: Types, occurrence and distribution along Adriatic shorelines	2017	Bellocchino, Italy	44.6507	12.2547		1	1							1					1						M
2017	Munari et al	Plastic debris in the Mediterranean Sea: Types, occurrence and distribution along Adriatic shorelines	2017	Casalborsetti, Italy	44.5526	12.2836		1	1							1					1						M
2017	Munari et al	Plastic debris in the Mediterranean Sea: Types, occurrence and distribution along Adriatic shorelines	2017	Bevano, Italy	44.4742	12.286		1	1							1					1						M
2018	Phuong et al	Microplastic abundance and characteristics in French Atlantic coastal sediments using a new extraction method	2018	Pen-Be, France	47.4258	-2.46278		1			0.5			1							1						M
2018	Phuong et al	Microplastic abundance and characteristics in French Atlantic coastal sediments using a new extraction method	2018	Coupelasse, France	47.0253	-2.01942		1			0.5			1							1						M
2018	Phuong et al	Microplastic abundance and characteristics in French Atlantic coastal sediments using a new extraction method	2018	Aiguillon Bay, France	46.2739	-1.23722		1			0.5			1							1						M
2019	Pinheiro et al	Do beachrocks affect microplastic deposition on the strandline of sandy beaches?	2019	Boa Viagem beach, Recife, Brazil	-8.13217	-34.8997		1	1							1					1						M
2019	Piperagkas et al	Qualitative and quantitative assessment of microplastics in three sandy Mediterranean beaches, including different methodological approaches	2019	Pachia Ammos Beach, Northern Crete, Greece	35.2318	23.6784		1			0.5			1							1						M
2019	Piperagkas et al	Qualitative and quantitative assessment of microplastics in three sandy Mediterranean beaches, including different methodological approaches	2019	Dionysos, Northern Crete, Greece	35.215	26.1858		1			0.5			1							1						M
2019	Piperagkas et al	Qualitative and quantitative assessment of microplastics in three sandy Mediterranean beaches, including different methodological approaches	2019	Fish Farm Beach, Northern Crete, Greece	35.2574	26.2252		1			0.5			1							1						M
2017	Karlsson et al	Screening for microplastics in sediment, water, marine invertebrates and fish: Method development and microplastic accumulation	2017	Lake Veere, Netherlands	51.5569	3.66869		1	1												1						M
2017	Karlsson et al	Screening for microplastics in sediment, water, marine invertebrates and fish: Method development and microplastic accumulation	2017	Hook of Holland, Netherlands	51.9788	4.11519		1	1												1						M
2017	Karlsson et al	Screening for microplastics in sediment, water, marine invertebrates and fish: Method development and microplastic accumulation	2017	IJmuiden Pier, Netherlands	52.4597	4.54845		1	1												1						M
2017	Karlsson et al	Screening for microplastics in sediment, water, marine invertebrates and fish: Method development and microplastic accumulation	2017	Stenungssund, Sweden	58.0782	11.8177		1	1												1						M
2006	Ng & Obbard	Prevalence of microplastics in Singapore's coastal marine environment	2006	St. John Island, Singapore	1.21961	103.848		1	1							1					1						M
2006	Ng & Obbard	Prevalence of microplastics in Singapore's coastal marine environment	2006	Pasir Ris, Singapore	1.3851	103.946		1	1							1					1						M
2006	Ng & Obbard	Prevalence of microplastics in Singapore's coastal marine environment	2006	East Coast, Singapore	1.29924	103.911		1	1							1					1						M
2006	Ng & Obbard	Prevalence of microplastics in Singapore's coastal marine environment	2006	Changi, Singapore	1.39093	103.992		1	1							1					1						M
2006	Ng & Obbard	Prevalence of microplastics in Singapore's coastal marine environment	2006	Kallang River, Singapore	1.30549	103.867		1	1							1					1						M
2006	Ng & Obbard	Prevalence of microplastics in Singapore's coastal marine environment	2006	Sembawang, Singapore	1.44911	103.818		1	1							1					1						M
2006	Ng & Obbard	Prevalence of microplastics in Singapore's coastal marine environment	2006	Sentosa Island, Singapore	1.24691	103.833		1	1							1					1						M
2004	Thompson et al	Lost at sea: Where is all the plastic?	2004	Plymouth, England	50.3199	-4.1129		1	1							1					1						M
2017	Lourenco et al	Plastics and other microfibres in sediments, macroinvertebrates and shorebirds from three intertidal wetlands ofsouthern Europe and west Africa	2017	Tejo Estuary, Portugal	38.7667	-9.01667		1	1												1						M
2017	Lourenco et al	Plastics and other microfibres in sediments, macroinvertebrates and shorebirds from three intertidal wetlands ofsouthern Europe and west Africa	2017	Banc d'Arguin, Mauritania	19.9333	-16.5833		1	1												1						M
2017	Lourenco et al	Plastics and other microfibres in sediments, macroinvertebrates and shorebirds from three intertidal wetlands ofsouthern Europe and west Africa	2017	Bijagos Archipeligo, Guinea-Bassau	11.25	-16.0833		1	1												1						M
2017	Abib Abayomi et al	Microplastics in coastal environments of the Arabian Gulf	2017	Umm Bab, Qatar	25.2089	50.7682		1	1							1					1						M
2017	Abib Abayomi et al	Microplastics in coastal environments of the Arabian Gulf	2017	Dukhan, Qatar	25.405	50.7558		1	1							1					1						M
2017	Abib Abayomi et al	Microplastics in coastal environments of the Arabian Gulf	2017	Al Ruwais, Qatar	26.1446	51.2155		1	1							1					1						M
2017	Abib Abayomi et al	Microplastics in coastal environments of the Arabian Gulf	2017	Das Laffan, Qatar	25.8597	51.583		1	1							1					1						M
2017	Abib Abayomi et al	Microplastics in coastal environments of the Arabian Gulf	2017	Al Dhakhira, Qatar	25.7394	51.5465		1	1							1					1						M
2017	Abib Abayomi et al	Microplastics in coastal environments of the Arabian Gulf	2017	Pearl beach, Qatar	25.3632	51.5433		1	1							1					1						M
2017	Abib Abayomi et al	Microplastics in coastal environments of the Arabian Gulf	2017	Doha Bay, Qatar	25.3362	51.5269		1	1							1					1						M
2017	Abib Abayomi et al	Microplastics in coastal environments of the Arabian Gulf	2017	Mesaieed, Qatar	24.8481	51.5091		1	1							1					1						M
2019	Atwood et al	Coastal accumulation of microplastic particles emitted from the Po River, Northern Italy: Comparing remote sensing and hydrodynamic modelling with in situ sample collections	2019	Caleri, Italy	45.0987	12.3274		1	1							1	1	1			1						M
2019	Atwood et al	Coastal accumulation of microplastic particles emitted from the Po River, Northern Italy: Comparing remote sensing and hydrodynamic modelling with in situ sample collections	2019	Levante, Italy	45.0496	12.3632		1	1							1	1	1			1						M
2019	Atwood et al	Coastal accumulation of microplastic particles emitted from the Po River, Northern Italy: Comparing remote sensing and hydrodynamic modelling with in situ sample collections	2019	Bocassette, Italy	44.9975	12.4246		1	1							1	1	1			1						M
2019	Atwood et al	Coastal accumulation of microplastic particles emitted from the Po River, Northern Italy: Comparing remote sensing and hydrodynamic modelling with in situ sample collections	2019	Pila North 1, Italy	44.9656	12.4822		1	1							1	1	1			1						M
2019	Atwood et al	Coastal accumulation of microplastic particles emitted from the Po River, Northern Italy: Comparing remote sensing and hydrodynamic modelling with in situ sample collections	2019	Pila North 2, Italy	44.977	12.5376		1	1							1	1	1			1						M
2019	Atwood et al	Coastal accumulation of microplastic particles emitted from the Po River, Northern Italy: Comparing remote sensing and hydrodynamic modelling with in situ sample collections	2019	Pila South, Italy	44.9509	12.534		1	1							1	1	1			1						M
2019	Atwood et al	Coastal accumulation of microplastic particles emitted from the Po River, Northern Italy: Comparing remote sensing and hydrodynamic modelling with in situ sample collections	2019	Allagamento, Italy	44.8729	12.4812		1	1							1	1	1			1						M
2019	Atwood et al	Coastal accumulation of microplastic particles emitted from the Po River, Northern Italy: Comparing remote sensing and hydrodynamic modelling with in situ sample collections	2019	Barricata, Italy	44.847	12.4644		1	1							1	1	1			1						M
2019	Atwood et al	Coastal accumulation of microplastic particles emitted from the Po River, Northern Italy: Comparing remote sensing and hydrodynamic modelling with in situ sample collections	2019	Goro, Italy	44.8532	12.2971		1	1							1	1	1			1						M
2011	Claessens et al	Occurrence and distribution of microplastics in marine sediments along the Belgian coast	2011	Koksijde-Bad, Belgium	51.1212	2.63393		1	1							1					1						M
2011	Claessens et al	Occurrence and distribution of microplastics in marine sediments along the Belgian coast	2011	Groenendijk, Belgium	51.1431	2.70105		1	1							1					1						M
2011	Claessens et al	Occurrence and distribution of microplastics in marine sediments along the Belgian coast	2011	Knokke-Zoute, Belgium	51.3565	3.3032		1	1							1					1						M
2017	Graca et al	Sources and fate of microplastics in marine and beach sediments of the Southern Baltic Sea—a preliminary study	2017	Gulf of Gdansk, Poland	54.3756	18.7297		1				1		1							1						M
2017	Graca et al	Sources and fate of microplastics in marine and beach sediments of the Southern Baltic Sea—a preliminary study	2017	Gulf of Gdansk, Poland	54.5144	18.5503		1				1		1							1						M
2017	Graca et al	Sources and fate of microplastics in marine and beach sediments of the Southern Baltic Sea—a preliminary study	2017	Gulf of Gdansk, Poland	54.8328	18.2097		1				1		1							1						M
2018	Karthik et al	Microplastics along the beaches of southeast coast of India	2018	Ennore, Tamil Nadu, India	13.2167	80.3167		1	1							1					1						M
2018	Karthik et al	Microplastics along the beaches of southeast coast of India	2018	Cooum, India	13.05	80.2833		1	1							1					1						M
2018	Karthik et al	Microplastics along the beaches of southeast coast of India	2018	Adyar, India	13	80.2667		1	1							1					1						M
2018	Karthik et al	Microplastics along the beaches of southeast coast of India	2018	Muttukadu, India	12.8	80.2333		1	1							1					1						M
2018	Karthik et al	Microplastics along the beaches of southeast coast of India	2018	Puducherry, India	11.9667	79.8		1	1							1					1						M
2018	Karthik et al	Microplastics along the beaches of southeast coast of India	2018	Cuddalore, India	11.7333	79.7833		1	1							1					1						M
2018	Karthik et al	Microplastics along the beaches of southeast coast of India	2018	Pazhayar, India	11.35	79.8333		1	1							1					1						M
2018	Karthik et al	Microplastics along the beaches of southeast coast of India	2018	Nagapattinam, India	10.7667	79.85		1	1							1					1						M
2018	Karthik et al	Microplastics along the beaches of southeast coast of India	2018	Manamelkudi, India	10.0333	79.25		1	1							1					1						M
2018	Karthik et al	Microplastics along the beaches of southeast coast of India	2018	Tuticorin, India	8.73333	78.1667		1	1							1					1						M
2018	Karthik et al	Microplastics along the beaches of southeast coast of India	2018	Mahalbalipuram, India	12.6167	80.1833		1	1							1					1						M
2018	Karthik et al	Microplastics along the beaches of southeast coast of India	2018	Poompuhar, India	11.1333	79.85		1	1							1					1						M
2018	Karthik et al	Microplastics along the beaches of southeast coast of India	2018	Karaikal, India	10.9	79.85		1	1							1					1						M
2018	Karthik et al	Microplastics along the beaches of southeast coast of India	2018	Velankanni, India	10.6667	79.85		1	1							1					1						M
2018	Karthik et al	Microplastics along the beaches of southeast coast of India	2018	Rameshwaram, India	9.28333	79.3167		1	1							1					1						M
2018	Karthik et al	Microplastics along the beaches of southeast coast of India	2018	Tiruchendur, India	8.48333	78.1167		1	1							1					1						M
2018	Karthik et al	Microplastics along the beaches of southeast coast of India	2018	Uvari, India	8.28333	77.9		1	1							1					1						M
2018	Karthik et al	Microplastics along the beaches of southeast coast of India	2018	Kanyakumari, India	8.06667	77.55		1	1							1					1						M
2018	Karthik et al	Microplastics along the beaches of southeast coast of India	2018	Marakkanam, India	12.1667	79.95		1	1							1					1						M
2018	Karthik et al	Microplastics along the beaches of southeast coast of India	2018	Parangipettai, India	11.5167	79.7667		1	1							1					1						M
2018	Karthik et al	Microplastics along the beaches of southeast coast of India	2018	Mallipattinam, India	10.2667	79.3167		1	1							1					1						M
2018	Karthik et al	Microplastics along the beaches of southeast coast of India	2018	Thondi, India	9.73333	79.0167		1	1							1					1						M
2018	Karthik et al	Microplastics along the beaches of southeast coast of India	2018	Kilakarai, India	9.21667	78.7833		1	1							1					1						M
2018	Karthik et al	Microplastics along the beaches of southeast coast of India	2018	Manapad, India	8.36667	78.0667		1	1							1					1						M
2018	Karthik et al	Microplastics along the beaches of southeast coast of India	2018	Idinthakarai, India	8.16667	77.7333		1	1							1					1						M
2017	Nel et al	Do microplastic loads reflect the population demographics along the southern African coastline?	2017	Cape Vidal, South Africa	-28.1256	32.5579		1	1							1	1				1						M
2017	Nel et al	Do microplastic loads reflect the population demographics along the southern African coastline?	2017	Richard's Bay Harbour, South Africa	-28.7999	32.0833		1	1							1	1				1						M
2017	Nel et al	Do microplastic loads reflect the population demographics along the southern African coastline?	2017	Salt Rock, South Africa	-29.507	31.2358		1	1							1	1				1						M
2017	Nel et al	Do microplastic loads reflect the population demographics along the southern African coastline?	2017	Durban Harbour & Vetchies, South Africa	-29.8723	31.0249		1	1							1	1				1						M
2017	Nel et al	Do microplastic loads reflect the population demographics along the southern African coastline?	2017	Port Edward, South Africa	-31.0666	30.2177		1	1							1	1				1						M
2017	Nel et al	Do microplastic loads reflect the population demographics along the southern African coastline?	2017	Morgan's Bay, South Africa	-32.7094	28.3414		1	1							1	1				1						M
2017	Nel et al	Do microplastic loads reflect the population demographics along the southern African coastline?	2017	Kenton-on-sea, South Africa	-33.6806	26.6702		1	1							1	1				1						M
2017	Nel et al	Do microplastic loads reflect the population demographics along the southern African coastline?	2017	St. Francis, South Africa	-34.1606	24.8237		1	1							1	1				1						M
2017	Nel et al	Do microplastic loads reflect the population demographics along the southern African coastline?	2017	Brenton-on-sea, South Africa	-34.0734	23.0191		1	1							1	1				1						M
2017	Nel et al	Do microplastic loads reflect the population demographics along the southern African coastline?	2017	Kommetjie, South Africa	-34.1369	18.3285		1	1							1	1				1						M
2017	Nel et al	Do microplastic loads reflect the population demographics along the southern African coastline?	2017	Cape Town Harbour, South Africa	-33.9042	18.43		1	1							1	1				1						M
2017	Nel et al	Do microplastic loads reflect the population demographics along the southern African coastline?	2017	Paternoster, South Africa	-32.8014	17.902		1	1							1	1				1						M
2017	Nel et al	Do microplastic loads reflect the population demographics along the southern African coastline?	2017	Doringbaai, South Africa	-31.8163	18.2333		1	1							1	1				1						M
2017	Nel et al	Do microplastic loads reflect the population demographics along the southern African coastline?	2017	Hondeklipbaai, South Africa	-30.3286	17.296		1	1							1	1				1						M
2017	Nel et al	Do microplastic loads reflect the population demographics along the southern African coastline?	2017	Port Nolloth, South Africa	-29.257	16.8669		1	1							1	1				1						M
2010	Ribic et al	Trends and drivers of marine debris on the Atlantic coast of the United States 1997-2007	2010	Atlantic USA (whole coast)			1			1	1	1		1							1						M
2013	Rosevelt et al	Marine debris in central California: Quantifying type and abundance of beach litter in Monterey Bay, CA	2013	Santa Cruz Bay Main Beach, California	36.9634	-122.019	1	1			1	1		1		1					1						M
2013	Rosevelt et al	Marine debris in central California: Quantifying type and abundance of beach litter in Monterey Bay, CA	2013	Seabright State Beach, California	36.9631	-122.008	1	1			1	1		1		1					1						M
2013	Rosevelt et al	Marine debris in central California: Quantifying type and abundance of beach litter in Monterey Bay, CA	2013	Live Oak, California	36.9598	-121.984	1	1			1	1		1		1					1						M
2013	Rosevelt et al	Marine debris in central California: Quantifying type and abundance of beach litter in Monterey Bay, CA	2013	Capitola City Beach, California	36.9716	-121.951	1	1			1	1		1		1					1						M
2013	Rosevelt et al	Marine debris in central California: Quantifying type and abundance of beach litter in Monterey Bay, CA	2013	New Brighton State Beach, California	36.98	-121.933	1	1			1	1		1		1					1						M
2013	Rosevelt et al	Marine debris in central California: Quantifying type and abundance of beach litter in Monterey Bay, CA	2013	Seacliff State Beach, California	36.972	-121.914	1	1			1	1		1		1					1						M
2013	Rosevelt et al	Marine debris in central California: Quantifying type and abundance of beach litter in Monterey Bay, CA	2013	Manresa State Beach, California	36.9326	-121.862	1	1			1	1		1		1					1						M
2013	Rosevelt et al	Marine debris in central California: Quantifying type and abundance of beach litter in Monterey Bay, CA	2013	Sunset State Beach, California	36.8868	-121.833	1	1			1	1		1		1					1						M
2013	Rosevelt et al	Marine debris in central California: Quantifying type and abundance of beach litter in Monterey Bay, CA	2013	Zmudowski State Beach, California	36.8427	-121.805	1	1			1	1		1		1					1						M
2013	Rosevelt et al	Marine debris in central California: Quantifying type and abundance of beach litter in Monterey Bay, CA	2013	Marina State Beach, California	36.6928	-121.809	1	1			1	1		1		1					1						M
2013	Rosevelt et al	Marine debris in central California: Quantifying type and abundance of beach litter in Monterey Bay, CA	2013	Seaside State Beach, California	36.6123	-121.858	1	1			1	1		1		1					1						M
2013	Rosevelt et al	Marine debris in central California: Quantifying type and abundance of beach litter in Monterey Bay, CA	2013	Del Monte City Beach, California	36.6049	-121.869	1	1			1	1		1		1					1						M
1990	Ryan and Maloney	Plastic and other artefacts on South African beaches: temporal trends in abundance and composition	1990	South Africa (Cape Province)				1						1							1						M
2018	Saliu et al	Microplastic and charred microplastic in the Faafu Atoll, Maldives	2018	Faafu Atoll, Maldives	72.9193	3.06178	1	1	1							1					1						M
2018	Saliu et al	Microplastic and charred microplastic in the Faafu Atoll, Maldives	2018	Faafu Atoll, Maldives	72.9612	3.078	1	1	1							1					1						M
2018	Saliu et al	Microplastic and charred microplastic in the Faafu Atoll, Maldives	2018	Faafu Atoll, Maldives	72.9668	3.07936	1	1	1							1					1						M
2018	Saliu et al	Microplastic and charred microplastic in the Faafu Atoll, Maldives	2018	Faafu Atoll, Maldives	72.9831	3.12142	1	1	1							1					1						M
2018	Saliu et al	Microplastic and charred microplastic in the Faafu Atoll, Maldives	2018	Faafu Atoll, Maldives	73.0333	3.213	1	1	1							1					1						M
2018	Saliu et al	Microplastic and charred microplastic in the Faafu Atoll, Maldives	2018	Faafu Atoll, Maldives	73.0339	3.21303	1	1	1							1					1						M
2019	Sathish et al	Abundance, characteristics and surface degradation features of microplastics in beach sediments of five coastal areas in Tamil Nadu, India	2019	Marina Beach, Tamil Nadu, India	13.05	80.2824	1	1	1							1		1			1						M
2019	Sathish et al	Abundance, characteristics and surface degradation features of microplastics in beach sediments of five coastal areas in Tamil Nadu, India	2019	Kanyakumari Beach, India	8.08	77.57	1	1	1							1		1			1						M
2019	Sathish et al	Abundance, characteristics and surface degradation features of microplastics in beach sediments of five coastal areas in Tamil Nadu, India	2019	Tiruchendur, India	8.5	78.12	1	1	1							1		1			1						M
2019	Sathish et al	Abundance, characteristics and surface degradation features of microplastics in beach sediments of five coastal areas in Tamil Nadu, India	2019	Manapad, India	8.375	78.06	1	1	1							1		1			1						M
2019	Sathish et al	Abundance, characteristics and surface degradation features of microplastics in beach sediments of five coastal areas in Tamil Nadu, India	2019	Tuticorin, India	8.764	78.15	1	1	1							1		1			1						M
2016	Shim et al	Identification and quantification of microplastics using Nile Red staining	2016	Heungnam Beach, Korea	34.9594	128.714		1	1												1						M
2018	Silc et al	Beach litter along various sand dune habitats in the southern Adriatic (E Mediterranean)	2018	Velika Plaza, Montenegro	41.8954	19.2873	1		1												1						M
2016	da Silva et al	The influence of the intensity of use, rainfall and location in the amount of marine debris in four beaches in Niteroi, Brazil: Sossego, Camboinhas, Charitas and Flechas	2016	Itaipo, Niteroi, Brazil	-22.9713	-43.0459	1				1	1		1							1						M
2016	da Silva et al	The influence of the intensity of use, rainfall and location in the amount of marine debris in four beaches in Niteroi, Brazil: Sossego, Camboinhas, Charitas and Flechas	2016	Itacoatiara, Niteroi, Brazil	-22.9746	-43.0325	1				1	1		1							1						M
2018	da Silva et al	Marine debris on beaches of Arraial do Cabo, RJ, Brazil: An important coastal tourist destination	2018	Pontal Beach, Arraial do Cabo, Brazil	-23.0313	-43.4761	1				1			1							1						M
2018	da Silva et al	Marine debris on beaches of Arraial do Cabo, RJ, Brazil: An important coastal tourist destination	2018	Prainha Beach, Arraial do Cabo, Brazil	-23.0406	-43.5053	1				1			1							1						M
2018	da Silva et al	Marine debris on beaches of Arraial do Cabo, RJ, Brazil: An important coastal tourist destination	2018	Grande Beach, Arraial do Cabo, Brazil	-22.9698	-42.0339	1				1			1							1						M
2019	Tiwari et al	Distribution and characterization of microplastics in beach sand from three different Indian coastal environments	2019	Girgaon Chowpatty, India	18.9538	72.8118		1	1												1						M
2019	Tiwari et al	Distribution and characterization of microplastics in beach sand from three different Indian coastal environments	2019	Tuticorin beach, India	8.80792	78.163		1	1												1						M
2019	Tiwari et al	Distribution and characterization of microplastics in beach sand from three different Indian coastal environments	2019	Dhanushkodi beach, India	9.14953	79.449		1	1												1						M
2013	Topcu et al	Origin and abundance of marine litter along sandy beaches of the Turkish Western Black Sea Coast	2013	Yalikoy, Turkey	41.484	28.3022	1				1			1							1						M
2013	Topcu et al	Origin and abundance of marine litter along sandy beaches of the Turkish Western Black Sea Coast	2013	Sisecam, Turkey	41.4736	28.3274	1				1			1							1						M
2013	Topcu et al	Origin and abundance of marine litter along sandy beaches of the Turkish Western Black Sea Coast	2013	Evcik, Turkey	41.4502	28.384	1				1			1							1						M
2013	Topcu et al	Origin and abundance of marine litter along sandy beaches of the Turkish Western Black Sea Coast	2013	Ormanli, Turkey	41.4081	28.4913	1				1			1							1						M
2013	Topcu et al	Origin and abundance of marine litter along sandy beaches of the Turkish Western Black Sea Coast	2013	Kisirkaya, Turkey	41.2525	28.9738	1				1			1							1						M
2013	Topcu et al	Origin and abundance of marine litter along sandy beaches of the Turkish Western Black Sea Coast	2013	Kilyos, Turkey	41.2452	29.0281	1				1			1							1						M
2013	Topcu et al	Origin and abundance of marine litter along sandy beaches of the Turkish Western Black Sea Coast	2013	Sahilkoy, Turkey	41.2029	29.4213	1				1			1							1						M
2013	Topcu et al	Origin and abundance of marine litter along sandy beaches of the Turkish Western Black Sea Coast	2013	Alacalikoy, Turkey	41.192	29.4689	1				1			1							1						M
2013	Topcu et al	Origin and abundance of marine litter along sandy beaches of the Turkish Western Black Sea Coast	2013	Sile, Turkey	41.1713	29.5984	1				1			1							1						M
2013	Topcu et al	Origin and abundance of marine litter along sandy beaches of the Turkish Western Black Sea Coast	2013	Agva, Turkey	41.1384	29.8493	1				1			1							1						M
2012	Van et al	Persistent organic pollutants in plastic marine debris found on beaches in San Diego, California	2012	Imperial Beach, San Diego, California, USA	32.5839	-117.113	1		1												1						M
2012	Van et al	Persistent organic pollutants in plastic marine debris found on beaches in San Diego, California	2012	Torrey Pines State Beach, San Diego, California, USA	32.9338	-117.261	1		1												1						M
2012	Van et al	Persistent organic pollutants in plastic marine debris found on beaches in San Diego, California	2012	La Jolla Shores, San Diego, California, USA	32.8572	-117.257	1		1												1						M
2012	Van et al	Persistent organic pollutants in plastic marine debris found on beaches in San Diego, California	2012	Pacific Beach, San Diego, California, USA	32.8025	-117.236	1		1												1						M
2012	Van et al	Persistent organic pollutants in plastic marine debris found on beaches in San Diego, California	2012	Mission Beach, San Diego, California, USA	32.7681	-117.252	1		1												1						M
2012	Van et al	Persistent organic pollutants in plastic marine debris found on beaches in San Diego, California	2012	Mission Bay, San Diego, California, USA	32.7779	-117.226	1		1												1						M
2012	Van et al	Persistent organic pollutants in plastic marine debris found on beaches in San Diego, California	2012	Ocean Beach, San Diego, California, USA	32.7495	-117.247	1	1					1	1							1						M
2012	Van et al	Persistent organic pollutants in plastic marine debris found on beaches in San Diego, California	2012	Coronado Beach, San Diego, California, USA	32.6837	-117.187	1		1												1						M
1987	Vauk and Schrey	Litter pollution from ships in the German Bight	1987	Helgoland, Germany	54.1833	7.91667	1				1	1	1	1							1						M
2016	Veerasingam et al	Characteristics, seasonal distribution and surface degradation features of microplastic pellets along the Goa coast, India	2016	Keri, Goa State, India	15.7081	73.6941	1				1			1		1					1						M
2016	Veerasingam et al	Characteristics, seasonal distribution and surface degradation features of microplastic pellets along the Goa coast, India	2016	Vagator, Goa State, India	15.603	73.7336	1				1			1		1					1						M
2016	Veerasingam et al	Characteristics, seasonal distribution and surface degradation features of microplastic pellets along the Goa coast, India	2016	Calangute, Goa State, India	15.5494	73.7535	1				1			1		1					1						M
2016	Veerasingam et al	Characteristics, seasonal distribution and surface degradation features of microplastic pellets along the Goa coast, India	2016	Colva, Goa State, India	15.2806	73.9113	1				1			1		1					1						M
2016	Veerasingam et al	Characteristics, seasonal distribution and surface degradation features of microplastic pellets along the Goa coast, India	2016	Mobor, Goa State, India	15.1563	73.9456	1				1			1		1					1						M
2016	Veerasingam et al	Characteristics, seasonal distribution and surface degradation features of microplastic pellets along the Goa coast, India	2016	Galgibag, Goa State, India	14.9601	74.0496	1				1			1		1					1						M
1998	Velander and Mocogni	Maritime litter and sewage contamination at Cramond Beach Edinburgh - a comparative study	1998	Scotland (Cramond Beach)	55.9806	-3.29849	1			1	1	1		1		1	1				1						M
2016	Wessel et al	Abundance and characteristics of microplastics in beach sediments: Insights into microplastic accumulation in northern Gulf of Mexico estuaries	2016	Mobile Bay, Alabama, USA	30.3661	-88.1119		1	1							1	1		1		1						M
2016	Wessel et al	Abundance and characteristics of microplastics in beach sediments: Insights into microplastic accumulation in northern Gulf of Mexico estuaries	2016	Mobile Bay, Alabama, USA	30.5737	-88.0818		1	1							1	1		1		1						M
2016	Wessel et al	Abundance and characteristics of microplastics in beach sediments: Insights into microplastic accumulation in northern Gulf of Mexico estuaries	2016	Mobile Bay, Alabama, USA	30.6588	-88.0256		1	1							1	1		1		1						M
2016	Wessel et al	Abundance and characteristics of microplastics in beach sediments: Insights into microplastic accumulation in northern Gulf of Mexico estuaries	2016	Mobile Bay, Alabama, USA	30.4774	-87.9254		1	1							1	1		1		1						M
2016	Wessel et al	Abundance and characteristics of microplastics in beach sediments: Insights into microplastic accumulation in northern Gulf of Mexico estuaries	2016	Mobile Bay, Alabama, USA	30.3737	-87.8366		1	1							1	1		1		1						M
2016	Wessel et al	Abundance and characteristics of microplastics in beach sediments: Insights into microplastic accumulation in northern Gulf of Mexico estuaries	2016	Mobile Bay, Alabama, USA	30.2346	-87.9697		1	1							1	1		1		1						M
2016	Wessel et al	Abundance and characteristics of microplastics in beach sediments: Insights into microplastic accumulation in northern Gulf of Mexico estuaries	2016	Mobile Bay, Alabama, USA	30.2508	-88.185		1	1							1	1		1		1						M
2019	Wessel et al	Accumulation and distribution of marine debris on barrier islands across the northern Gulf of Mexico	2019	Cat Island, Mississippi, USA	30.2283	-89.1016	1					1		1							1						M
2019	Wessel et al	Accumulation and distribution of marine debris on barrier islands across the northern Gulf of Mexico	2019	Horn Island, Mississippi, USA	30.2367	-88.6698	1					1		1							1						M
2019	Wessel et al	Accumulation and distribution of marine debris on barrier islands across the northern Gulf of Mexico	2019	Chandeleurs, Louisiana, USA	29.8365	-88.8387	1					1		1							1						M
2019	Wessel et al	Accumulation and distribution of marine debris on barrier islands across the northern Gulf of Mexico	2019	Petit Bois Island, Mississippi, USA	30.2048	-88.4428	1					1		1							1						M
2019	Wessel et al	Accumulation and distribution of marine debris on barrier islands across the northern Gulf of Mexico	2019	Dauphin Island West, Alabama, USA	30.2546	-88.1123	1					1		1							1						M
2019	Wessel et al	Accumulation and distribution of marine debris on barrier islands across the northern Gulf of Mexico	2019	Santa Rose, Florida, USA	30.3982	-86.7291	1					1		1							1						M
2019	Wessel et al	Accumulation and distribution of marine debris on barrier islands across the northern Gulf of Mexico	2019	San Jose Island, Texas, USA	28.0466	-96.9102	1					1		1							1						M
2019	Wessel et al	Accumulation and distribution of marine debris on barrier islands across the northern Gulf of Mexico	2019	Fish Pass, Texas, USA	27.6854	-97.177	1					1		1							1						M
2019	Wessel et al	Accumulation and distribution of marine debris on barrier islands across the northern Gulf of Mexico	2019	Padre Island National Seashore, Texas, USA	27.4241	-97.2992	1					1		1							1						M
2010	Widmer and Hennemann	Marine Debris in the Island of Santa Catarina, South Brazil: Spatial patterns, composition, and biological aspects	2010	Armacao, Brazil	-27.7503	-48.5027	1				1			1							1						M
2010	Widmer and Hennemann	Marine Debris in the Island of Santa Catarina, South Brazil: Spatial patterns, composition, and biological aspects	2010	Joaquina, Brazil	-27.6296	-48.4499	1				1			1							1						M
2010	Widmer and Hennemann	Marine Debris in the Island of Santa Catarina, South Brazil: Spatial patterns, composition, and biological aspects	2010	Galheta, Brazil	-27.5925	-48.4252	1				1			1							1						M
2010	Widmer and Hennemann	Marine Debris in the Island of Santa Catarina, South Brazil: Spatial patterns, composition, and biological aspects	2010	Mocambique, Brazil	-27.523	-48.4168	1				1			1							1						M
2010	Widmer and Hennemann	Marine Debris in the Island of Santa Catarina, South Brazil: Spatial patterns, composition, and biological aspects	2010	Brava, Brazil	-27.3947	-48.4141	1				1			1							1						M
2016	Williams et al	Distribution of beach litter along the coastline of Cádiz, Spain	2016	Cadiz, Spain	36.7889	-6.33944	1		1							1					1						M
2016	Williams et al	Distribution of beach litter along the coastline of Cádiz, Spain	2016	Cadiz, Spain	36.7708	-6.37833	1		1							1					1						M
2016	Williams et al	Distribution of beach litter along the coastline of Cádiz, Spain	2016	Cadiz, Spain	36.7444	-6.42139	1		1							1					1						M
2016	Williams et al	Distribution of beach litter along the coastline of Cádiz, Spain	2016	Cadiz, Spain	36.7392	-6.43833	1		1							1					1						M
2016	Williams et al	Distribution of beach litter along the coastline of Cádiz, Spain	2016	Cadiz, Spain	36.6894	-6.4225	1		1							1					1						M
2016	Williams et al	Distribution of beach litter along the coastline of Cádiz, Spain	2016	Cadiz, Spain	36.6667	-6.39667	1		1							1					1						M
2016	Williams et al	Distribution of beach litter along the coastline of Cádiz, Spain	2016	Cadiz, Spain	36.6222	-6.37861	1		1							1					1						M
2016	Williams et al	Distribution of beach litter along the coastline of Cádiz, Spain	2016	Cadiz, Spain	36.6269	-6.34639	1		1							1					1						M
2016	Williams et al	Distribution of beach litter along the coastline of Cádiz, Spain	2016	Cadiz, Spain	36.5958	-6.27444	1		1							1					1						M
2016	Williams et al	Distribution of beach litter along the coastline of Cádiz, Spain	2016	Cadiz, Spain	36.5792	-6.26111	1		1							1					1						M
2016	Williams et al	Distribution of beach litter along the coastline of Cádiz, Spain	2016	Cadiz, Spain	36.5833	-6.23972	1		1							1					1						M
2016	Williams et al	Distribution of beach litter along the coastline of Cádiz, Spain	2016	Cadiz, Spain	36.5714	-6.225	1		1							1					1						M
2016	Williams et al	Distribution of beach litter along the coastline of Cádiz, Spain	2016	Cadiz, Spain	36.55	-6.22472	1		1							1					1						M
2016	Williams et al	Distribution of beach litter along the coastline of Cádiz, Spain	2016	Cadiz, Spain	36.5297	-6.23194	1		1							1					1						M
2016	Williams et al	Distribution of beach litter along the coastline of Cádiz, Spain	2016	Cadiz, Spain	36.5247	-6.18389	1		1							1					1						M
2016	Williams et al	Distribution of beach litter along the coastline of Cádiz, Spain	2016	Cadiz, Spain	36.5233	-6.29028	1		1							1					1						M
2016	Williams et al	Distribution of beach litter along the coastline of Cádiz, Spain	2016	Cadiz, Spain	36.4975	-6.27389	1		1							1					1						M
2016	Williams et al	Distribution of beach litter along the coastline of Cádiz, Spain	2016	Cadiz, Spain	36.4383	-6.23778	1		1							1					1						M
2016	Williams et al	Distribution of beach litter along the coastline of Cádiz, Spain	2016	Cadiz, Spain	36.4131	-6.22361	1		1							1					1						M
2016	Williams et al	Distribution of beach litter along the coastline of Cádiz, Spain	2016	Cadiz, Spain	36.3903	-6.2125	1		1							1					1						M
2017	Wilson and Verlis	The ugly face of tourism: Marine debris pollution linked to visitation in the southern Great Barrier Reef, Australia	2017	Northwest Island, Capricorn-Bunker islands, Australia	-23.3024	151.537	1		1							1					1						M
2017	Wilson and Verlis	The ugly face of tourism: Marine debris pollution linked to visitation in the southern Great Barrier Reef, Australia	2017	Heron Island, Capricorn-Bunker islands, Australia	-23.4422	151.915	1		1							1					1						M
2017	Wilson and Verlis	The ugly face of tourism: Marine debris pollution linked to visitation in the southern Great Barrier Reef, Australia	2017	Wreck Island, Capricorn-Bunker islands, Australia	-23.3326	151.958	1		1							1					1						M
2017	Wilson and Verlis	The ugly face of tourism: Marine debris pollution linked to visitation in the southern Great Barrier Reef, Australia	2017	Tryon Island, Capricorn-Bunker islands, Australia	-23.2487	151.779	1		1							1					1						M
2018	Jang et al	Composition and abundance of marine debris stranded on the beaches of Sri Lanka: Results from the first island-wide survey	2018	Casuarina, Sri Lanka	9.76314	79.888	1	1	1							1	1		1		1						M
2018	Jang et al	Composition and abundance of marine debris stranded on the beaches of Sri Lanka: Results from the first island-wide survey	2018	Sri Sangamitta, Sri Lanka	9.7849	79.9411	1	1	1							1	1		1		1						M
2018	Jang et al	Composition and abundance of marine debris stranded on the beaches of Sri Lanka: Results from the first island-wide survey	2018	Mullaitivu, Sri Lanka	9.27166	80.8195	1	1	1							1	1		1		1						M
2018	Jang et al	Composition and abundance of marine debris stranded on the beaches of Sri Lanka: Results from the first island-wide survey	2018	Alampil, Sri Lanka	9.19313	80.8532	1	1	1							1	1		1		1						M
2018	Jang et al	Composition and abundance of marine debris stranded on the beaches of Sri Lanka: Results from the first island-wide survey	2018	Pankulam Aru, Sri Lanka	8.80524	81.1098	1	1	1							1	1		1		1						M
2018	Jang et al	Composition and abundance of marine debris stranded on the beaches of Sri Lanka: Results from the first island-wide survey	2018	Sri Lanka - Back Bay	8.58127	81.2316	1	1	1							1	1		1		1						M
2018	Jang et al	Composition and abundance of marine debris stranded on the beaches of Sri Lanka: Results from the first island-wide survey	2018	Sallitive Island, Sri Lanka	8.11112	81.4634	1	1	1							1	1		1		1						M
2018	Jang et al	Composition and abundance of marine debris stranded on the beaches of Sri Lanka: Results from the first island-wide survey	2018	Thalankuda, Sri Lanka	7.65064	81.7611	1	1	1							1	1		1		1						M
2018	Jang et al	Composition and abundance of marine debris stranded on the beaches of Sri Lanka: Results from the first island-wide survey	2018	Kirinda, Sri Lanka	6.21662	81.3372	1	1	1							1	1		1		1						M
2018	Jang et al	Composition and abundance of marine debris stranded on the beaches of Sri Lanka: Results from the first island-wide survey	2018	Bundala, Sri Lanka	6.16541	81.22	1	1	1							1	1		1		1						M
2018	Jang et al	Composition and abundance of marine debris stranded on the beaches of Sri Lanka: Results from the first island-wide survey	2018	Hambantota, Sri Lanka	6.133	81.1315	1	1	1							1	1		1		1						M
2018	Jang et al	Composition and abundance of marine debris stranded on the beaches of Sri Lanka: Results from the first island-wide survey	2018	Kudawella, Sri Lanka	5.97989	80.7263	1	1	1							1	1		1		1						M
2018	Jang et al	Composition and abundance of marine debris stranded on the beaches of Sri Lanka: Results from the first island-wide survey	2018	Galle, Sri Lanka	6.04078	80.1973	1	1	1							1	1		1		1						M
2018	Jang et al	Composition and abundance of marine debris stranded on the beaches of Sri Lanka: Results from the first island-wide survey	2018	Kalutara, Sri Lanka	6.57967	79.9596	1	1	1							1	1		1		1						M
2018	Jang et al	Composition and abundance of marine debris stranded on the beaches of Sri Lanka: Results from the first island-wide survey	2018	Modara, Sri Lanka	6.9691	79.8678	1	1	1							1	1		1		1						M
2018	Jang et al	Composition and abundance of marine debris stranded on the beaches of Sri Lanka: Results from the first island-wide survey	2018	Deduru oya mouth, Sri Lanka	7.61258	79.7964	1	1	1							1	1		1		1						M
2018	Jang et al	Composition and abundance of marine debris stranded on the beaches of Sri Lanka: Results from the first island-wide survey	2018	Udappuwa, Sri Lanka	7.74927	79.7892	1	1	1							1	1		1		1						M
2018	Jang et al	Composition and abundance of marine debris stranded on the beaches of Sri Lanka: Results from the first island-wide survey	2018	Kudawa, Sri Lanka	8.22669	79.7287	1	1	1							1	1		1		1						M
2018	Jang et al	Composition and abundance of marine debris stranded on the beaches of Sri Lanka: Results from the first island-wide survey	2018	Wilpattu, Sri Lanka	8.5832	79.9198	1	1	1							1	1		1		1						M
2018	Jang et al	Composition and abundance of marine debris stranded on the beaches of Sri Lanka: Results from the first island-wide survey	2018	Urumale, Sri Lanka	9.09257	79.6974	1	1	1							1	1		1		1						M
2018	Jang et al	Composition and abundance of marine debris stranded on the beaches of Sri Lanka: Results from the first island-wide survey	2018	Iluppaikkadavai, Sri Lanka	9.09909	80.0768	1	1	1							1	1		1		1						M
2018	Jang et al	Composition and abundance of marine debris stranded on the beaches of Sri Lanka: Results from the first island-wide survey	2018	Mulankavil, Sri Lanka	9.23584	80.1181	1	1	1							1	1		1		1						M
2016	Young and Elliott	Characterization of microplastic and mesoplastic debris in sediments from Kamilo Beach and Kahuku Beach, Hawai'i	2016	Kamilo Beach, Hawai'I, Hawaii	18.8569	-155.6		1	1									1			1					1	M
2016	Young and Elliott	Characterization of microplastic and mesoplastic debris in sediments from Kamilo Beach and Kahuku Beach, Hawai'i	2016	Kahuku Beach, Oahu, Hawaii	21.6836	-157.945		1	1									1			1					1	M
2016	Yu et al	Occurrence of microplastics in the beach sand of the Chinese inner sea: the Bohai Sea	2016	Bohai Sea, China	40.8096	120.967		1	1							1					1						M
2016	Yu et al	Occurrence of microplastics in the beach sand of the Chinese inner sea: the Bohai Sea	2016	Bohai Sea, China	40.7539	120.969		1	1							1					1						M
2016	Yu et al	Occurrence of microplastics in the beach sand of the Chinese inner sea: the Bohai Sea	2016	Bohai Sea, China	39.5337	119.261		1	1							1					1						M
2018	Yu et al	Occurrence and distribution of microplastics at selected coastal sites along the southeastern United States	2018	Oregon Inlet, North Carolina, USA	35.7777	-75.535		1	1								1				1					1	M
2018	Yu et al	Occurrence and distribution of microplastics at selected coastal sites along the southeastern United States	2018	Shackleford Banks, North Carolina, USA	34.6716	-76.6121		1	1								1				1					1	M
2018	Yu et al	Occurrence and distribution of microplastics at selected coastal sites along the southeastern United States	2018	Charleston, South Carolina, USA	32.752	-79.8753		1	1								1				1					1	M
2018	Yu et al	Occurrence and distribution of microplastics at selected coastal sites along the southeastern United States	2018	Cockspur Island, Georgia, USA	32.0314	-80.893		1	1								1				1					1	M
2018	Yu et al	Occurrence and distribution of microplastics at selected coastal sites along the southeastern United States	2018	St Marys, Georgia, USA	30.7819	-81.4561		1	1								1				1					1	M
2018	Yu et al	Occurrence and distribution of microplastics at selected coastal sites along the southeastern United States	2018	Nassau County, Florida, USA	30.5735	-81.4429		1	1								1				1					1	M
2018	Yu et al	Occurrence and distribution of microplastics at selected coastal sites along the southeastern United States	2018	St Johns County, Florida, USA	29.7109	-81.2262		1	1								1				1					1	M
2018	Yu et al	Occurrence and distribution of microplastics at selected coastal sites along the southeastern United States	2018	Canaveral National Seashore Outstanding Florida Water, Florida, USA	28.6856	-80.6542		1	1								1				1					1	M
2018	Yu et al	Occurrence and distribution of microplastics at selected coastal sites along the southeastern United States	2018	Islandia, Florida, USA	25.4809	-80.1795		1	1								1				1					1	M
2018	Yu et al	Occurrence and distribution of microplastics at selected coastal sites along the southeastern United States	2018	Everglades National Park, Florida, USA	25.1225	-81.0319		1	1								1				1					1	M
2018	Yu et al	Occurrence and distribution of microplastics at selected coastal sites along the southeastern United States	2018	Loggerhead Key, Florida, USA	24.6328	-82.9216		1	1								1				1					1	M
2018	Yu et al	Occurrence and distribution of microplastics at selected coastal sites along the southeastern United States	2018	Everglades National Park, Florida, USA	25.792	-81.4194		1	1								1				1					1	M
2018	Yu et al	Occurrence and distribution of microplastics at selected coastal sites along the southeastern United States	2018	Perdido Key, Florida, USA	30.3096	-87.3672		1	1								1				1					1	M
2018	Yu et al	Occurrence and distribution of microplastics at selected coastal sites along the southeastern United States	2018	Jackson County, Mississippi, USA	30.2323	-88.511		1	1								1				1					1	M
2018	Yu et al	Occurrence and distribution of microplastics at selected coastal sites along the southeastern United States	2018	Ship Island, Mississippi, USA	30.213	-88.9719		1	1								1				1					1	M
2018	Yu et al	Occurrence and distribution of microplastics at selected coastal sites along the southeastern United States	2018	Riviera Beach, Texas, USA	27.2361	-97.6254		1	1								1				1					1	M
2018	Yu et al	Occurrence and distribution of microplastics at selected coastal sites along the southeastern United States	2018	Windberg, US Virgin Islands	18.3561	-64.7459		1	1								1				1					1	M
2018	Yu et al	Occurrence and distribution of microplastics at selected coastal sites along the southeastern United States	2018	Buck Island, US Virgin Islands	17.7898	-64.6256		1	1								1				1					1	M
2012	Dippo	Microplastics in the coastal environment of west Iceland	2012	Westfjords, Iceland	65.4699	-23.6152		1	1							1	1			1	1						M
2012	Dippo	Microplastics in the coastal environment of west Iceland	2012	Snaefellsness, Iceland	64.9672	-23.3569		1	1							1	1			1	1						M
2012	Dippo	Microplastics in the coastal environment of west Iceland	2012	Snaefellsness, Iceland	64.9477	-23.4195		1	1							1	1			1	1						M
2012	Dippo	Microplastics in the coastal environment of west Iceland	2012	Snaefellsness, Iceland	64.8813	-23.9867		1	1							1	1			1	1						M
2012	Dippo	Microplastics in the coastal environment of west Iceland	2012	Snaefellsness, Iceland	64.8069	-23.5427		1	1							1	1			1	1						M
2012	Dippo	Microplastics in the coastal environment of west Iceland	2012	Snaefellsness, Iceland	64.81	-23.1455		1	1							1	1			1	1						M
2012	Dippo	Microplastics in the coastal environment of west Iceland	2012	Borgarnes, Iceland	64.624	-22.3688		1	1							1	1			1	1						M
2012	Dippo	Microplastics in the coastal environment of west Iceland	2012	Reykjavik, Iceland	64.1678	-21.7507		1	1							1	1			1	1						M
2012	Dippo	Microplastics in the coastal environment of west Iceland	2012	Reykjavik, Iceland	64.1475	-21.8213		1	1							1	1			1	1						M
2012	Dippo	Microplastics in the coastal environment of west Iceland	2012	Reykjavik, Iceland	64.1551	-22.0139		1	1							1	1			1	1						M
2012	Dippo	Microplastics in the coastal environment of west Iceland	2012	Reykjavik, Iceland	64.0987	-22.0281		1	1							1	1			1	1						M
2012	Dippo	Microplastics in the coastal environment of west Iceland	2012	Reykjavik, Iceland	64.0801	-22.6923		1	1							1	1			1	1						M
2012	Dippo	Microplastics in the coastal environment of west Iceland	2012	Iceland	65.4438	-21.4734		1	1							1	1			1	1						M
2019	Lavers et al	Significant plastic accumulation on the Cocos (Keeling) Islands, Australia	2019	NE Tip, Direction Island, Cocos Islands, Australia	-12.089	96.8841	1		1							1						1					M
2019	Lavers et al	Significant plastic accumulation on the Cocos (Keeling) Islands, Australia	2019	Northside, Direction Island, Cocos Islands, Australia	-12.089	96.8841	1		1							1							1				M
2019	Lavers et al	Significant plastic accumulation on the Cocos (Keeling) Islands, Australia	2019	NW Cove, Direction Island, Cocos Islands, Australia	-12.089	96.8841	1		1							1							1				M
2019	Lavers et al	Significant plastic accumulation on the Cocos (Keeling) Islands, Australia	2019	North Cove, Home Island, Cocos Islands, Australia	-12.1174	96.8969	1	1	1							1							1				M
2019	Lavers et al	Significant plastic accumulation on the Cocos (Keeling) Islands, Australia	2019	South Beach, Home Island, Cocos Islands, Australia	-12.1174	96.8969	1	1	1							1							1				M
2019	Lavers et al	Significant plastic accumulation on the Cocos (Keeling) Islands, Australia	2019	North East, Horsburgh Island, Cocos Islands, Australia	-12.0765	96.8396	1		1							1							1				M
2019	Lavers et al	Significant plastic accumulation on the Cocos (Keeling) Islands, Australia	2019	South West, Horsburgh Island, Cocos Islands, Australia	-12.0765	96.8396	1		1							1							1				M
2019	Lavers et al	Significant plastic accumulation on the Cocos (Keeling) Islands, Australia	2019	Lagoon Entry, North Keeling, Cocos Islands, Australia	-11.8324	96.8235	1		1							1							1				M
2019	Lavers et al	Significant plastic accumulation on the Cocos (Keeling) Islands, Australia	2019	Leeward, North Keeling, Cocos Islands, Australia	-11.8324	96.8235	1		1							1							1				M
2019	Lavers et al	Significant plastic accumulation on the Cocos (Keeling) Islands, Australia	2019	Lagoon, Pulu Maraya Island, Cocos Islands, Australia	-12.1998	96.8661	1		1							1							1				M
2019	Lavers et al	Significant plastic accumulation on the Cocos (Keeling) Islands, Australia	2019	Sandy Spit, Pulu Maraya Island, Cocos Islands, Australia	-12.1998	96.8661	1		1							1							1				M
2019	Lavers et al	Significant plastic accumulation on the Cocos (Keeling) Islands, Australia	2019	Landing, Pulu Maraya Island, Cocos Islands, Australia	-12.1998	96.8661	1		1							1							1				M
2019	Lavers et al	Significant plastic accumulation on the Cocos (Keeling) Islands, Australia	2019	Pondock, Pulu Maraya Island, Cocos Islands, Australia	-12.1998	96.8661	1		1							1							1				M
2019	Lavers et al	Significant plastic accumulation on the Cocos (Keeling) Islands, Australia	2019	Central SE, South Island, Cocos Islands, Australia	-12.1868	96.9252	1	1	1							1							1				M
2019	Lavers et al	Significant plastic accumulation on the Cocos (Keeling) Islands, Australia	2019	South West, South Island, Cocos Islands, Australia	-12.1868	96.9252	1		1							1							1				M
2019	Lavers et al	Significant plastic accumulation on the Cocos (Keeling) Islands, Australia	2019	South East, South Island, Cocos Islands, Australia	-12.1868	96.9252	1	1	1							1							1				M
2019	Lavers et al	Significant plastic accumulation on the Cocos (Keeling) Islands, Australia	2019	Gun Beach 1, West Island, Cocos Islands, Australia	-12.1592	96.8232	1	1	1							1							1				M
2019	Lavers et al	Significant plastic accumulation on the Cocos (Keeling) Islands, Australia	2019	Gun Beach 2, West Island, Cocos Islands, Australia	-12.1592	96.8232	1	1	1							1							1				M
2019	Lavers et al	Significant plastic accumulation on the Cocos (Keeling) Islands, Australia	2019	Jetty Beach T16, West Island, Cocos Islands, Australia	-12.1592	96.8232	1		1							1							1				M
2019	Lavers et al	Significant plastic accumulation on the Cocos (Keeling) Islands, Australia	2019	Jetty Beach T17, West Island, Cocos Islands, Australia	-12.1592	96.8232	1		1							1							1				M
2019	Lavers et al	Significant plastic accumulation on the Cocos (Keeling) Islands, Australia	2019	Jetty Beach T18, West Island, Cocos Islands, Australia	-12.1592	96.8232	1		1							1							1				M
2019	Lavers et al	Significant plastic accumulation on the Cocos (Keeling) Islands, Australia	2019	Jetty Beach T19, West Island, Cocos Islands, Australia	-12.1592	96.8232	1		1							1							1				M
2019	Lavers et al	Significant plastic accumulation on the Cocos (Keeling) Islands, Australia	2019	Scout Park 1, West Island, Cocos Islands, Australia	-12.1592	96.8232	1	1	1							1							1				M
2019	Lavers et al	Significant plastic accumulation on the Cocos (Keeling) Islands, Australia	2019	Scout Park 2, West Island, Cocos Islands, Australia	-12.1592	96.8232	1		1							1							1				M
2019	Lavers et al	Significant plastic accumulation on the Cocos (Keeling) Islands, Australia	2019	Monument, West Island, Cocos Islands, Australia	-12.1592	96.8232	1		1							1							1				M
2018	Zhang et al	Occurrences of organophosphorus esters and phthalates in the microplastics from coastal beaches in north China	2018	Bingzhou, Shangdong Peninsula, China	38.1226	118.045		1	1												1						M
2018	Zhang et al	Occurrences of organophosphorus esters and phthalates in the microplastics from coastal beaches in north China	2018	Dongying, Shangdong Peninsula, China	38.0448	118.583		1	1												1						M
2018	Zhang et al	Occurrences of organophosphorus esters and phthalates in the microplastics from coastal beaches in north China	2018	Dongying, Shangdong Peninsula, China	38.0359	118.615		1	1												1						M
2018	Zhang et al	Occurrences of organophosphorus esters and phthalates in the microplastics from coastal beaches in north China	2018	Dongying, Shangdong Peninsula, China	37.8533	119.103		1	1												1						M
2018	Zhang et al	Occurrences of organophosphorus esters and phthalates in the microplastics from coastal beaches in north China	2018	Dongying, Shangdong Peninsula, China	37.5966	118.965		1	1												1						M
2018	Zhang et al	Occurrences of organophosphorus esters and phthalates in the microplastics from coastal beaches in north China	2018	Dongying, Shangdong Peninsula, China	37.4365	118.922		1	1												1						M
2018	Zhang et al	Occurrences of organophosphorus esters and phthalates in the microplastics from coastal beaches in north China	2018	Weifang, Shangdong Peninsula, China	37.2217	119.216		1	1												1						M
2018	Zhang et al	Occurrences of organophosphorus esters and phthalates in the microplastics from coastal beaches in north China	2018	Weifang, Shangdong Peninsula, China	37.174	119.239		1	1												1						M
2018	Zhang et al	Occurrences of organophosphorus esters and phthalates in the microplastics from coastal beaches in north China	2018	Weifang, Shangdong Peninsula, China	37.1155	119.504		1	1												1						M
2018	Zhang et al	Occurrences of organophosphorus esters and phthalates in the microplastics from coastal beaches in north China	2018	Laizhou, Shangdong Peninsula, China	37.1334	119.755		1	1												1						M
2018	Zhang et al	Occurrences of organophosphorus esters and phthalates in the microplastics from coastal beaches in north China	2018	Laizhou, Shangdong Peninsula, China	37.3859	119.936		1	1												1						M
2018	Zhang et al	Occurrences of organophosphorus esters and phthalates in the microplastics from coastal beaches in north China	2018	Longkou, Shangdong Peninsula, China	37.6899	120.339		1	1												1						M
2018	Zhang et al	Occurrences of organophosphorus esters and phthalates in the microplastics from coastal beaches in north China	2018	Longkou, Shangdong Peninsula, China	37.7499	120.527		1	1												1						M
2018	Zhang et al	Occurrences of organophosphorus esters and phthalates in the microplastics from coastal beaches in north China	2018	Penglai, Shangdong Peninsula, China	37.8215	120.767		1	1												1						M
2018	Zhang et al	Occurrences of organophosphorus esters and phthalates in the microplastics from coastal beaches in north China	2018	Yantai, Shangdong Peninsula, China	37.5741	121.269		1	1												1						M
2018	Zhang et al	Occurrences of organophosphorus esters and phthalates in the microplastics from coastal beaches in north China	2018	Yantai, Shangdong Peninsula, China	37.521	121.449		1	1												1						M
2018	Zhang et al	Occurrences of organophosphorus esters and phthalates in the microplastics from coastal beaches in north China	2018	Yantai, Shangdong Peninsula, China	37.4404	121.559		1	1												1						M
2018	Zhang et al	Occurrences of organophosphorus esters and phthalates in the microplastics from coastal beaches in north China	2018	Yantai, Shangdong Peninsula, China	37.456	121.708		1	1												1						M
2018	Zhang et al	Occurrences of organophosphorus esters and phthalates in the microplastics from coastal beaches in north China	2018	Weihai, Shangdong Peninsula, China	37.5439	122.112		1	1												1						M
2018	Zhang et al	Occurrences of organophosphorus esters and phthalates in the microplastics from coastal beaches in north China	2018	Weihai, Shangdong Peninsula, China	37.1523	122.489		1	1												1						M
2018	Zhang et al	Occurrences of organophosphorus esters and phthalates in the microplastics from coastal beaches in north China	2018	Weihai, Shangdong Peninsula, China	36.9357	121.927		1	1												1						M
2018	Zhang et al	Occurrences of organophosphorus esters and phthalates in the microplastics from coastal beaches in north China	2018	Rushan, Shangdong Peninsula, China	36.8264	121.703		1	1												1						M
2018	Zhang et al	Occurrences of organophosphorus esters and phthalates in the microplastics from coastal beaches in north China	2018	Qingdao, Shangdong Peninsula, China	36.0894	120.466		1	1												1						M
2018	Zhang et al	Occurrences of organophosphorus esters and phthalates in the microplastics from coastal beaches in north China	2018	Qingdao, Shangdong Peninsula, China	36.051	120.366		1	1												1						M
2018	Zhang et al	Occurrences of organophosphorus esters and phthalates in the microplastics from coastal beaches in north China	2018	Qingdao, Shangdong Peninsula, China	35.9575	120.247		1	1												1						M
2018	Zhang et al	Occurrences of organophosphorus esters and phthalates in the microplastics from coastal beaches in north China	2018	Qingdao, Shangdong Peninsula, China	35.7566	119.917		1	1												1						M
2018	Zhang et al	Occurrences of organophosphorus esters and phthalates in the microplastics from coastal beaches in north China	2018	Rizhao, Shangdong Peninsula, China	35.5224	119.626		1	1												1						M
2018	Zhang et al	Occurrences of organophosphorus esters and phthalates in the microplastics from coastal beaches in north China	2018	Rizhao, Shangdong Peninsula, China	35.3071	119.443		1	1												1						M
2015	Pieper et al	Beach debris in the Azores (NE Atlantic): Faial Island as a first case study	2015	Porto Pim, Faial Island, Portugal	38.5247	-28.6256	1				0.5	1	1	1							1						M
2015	Pieper et al	Beach debris in the Azores (NE Atlantic): Faial Island as a first case study	2015	Praia da conceicao, Faial Island, Portugal	38.5431	-28.6189	1				0.5	1	1	1							1						M
2019	Pieper et al	Application of Matrix Scoring Techniques to evaluate marine debris sources in the remote islands of the Azores Archipelago	2019	Porto Pim, Faial Island, Portugal	38.5247	-28.6256	1			1	1	1	1	1							1						M
2019	Pieper et al	Application of Matrix Scoring Techniques to evaluate marine debris sources in the remote islands of the Azores Archipelago	2019	Praia da conceicao, Faial Island, Portugal	38.5431	-28.6189	1			1	1	1	1	1							1						M
2015	Ali & Sham	Quantitites and composition of shore debris along Clifton Beach, Karachi, Pakistan	2015	Clifton Beach, Karachi, Pakistan	24.8071	67.01	1					1		1			1		1		1						M
2017	Erni-Cassola et al	Lost, but found with Nile Red: A novel method for detecting and quantifying small microplastics (1 mm to 20 um) in environmental samples	2017	United Kingdom - Bigbury beach	50.2814	-3.895		1	1									1			1						M
2019	Camacho et al	Organic pollutants in marine plastic debris from Canary Islands beaches	2019	Las Canteras, Gran Canaria, Canary Islands	28.1313	-15.4454		1	1							1		1			1						M
2019	Camacho et al	Organic pollutants in marine plastic debris from Canary Islands beaches	2019	Los Cuervitos, Gran Canaria, Canary Islands	27.8799	-15.3902		1	1							1		1			1						M
2019	Camacho et al	Organic pollutants in marine plastic debris from Canary Islands beaches	2019	Famara, Lanzarote Island, Canary Islands	29.1157	-13.5587		1	1							1		1			1						M
2019	Camacho et al	Organic pollutants in marine plastic debris from Canary Islands beaches	2019	Lambra, La Graciosa Island, Canary Islands	29.279	-13.4959		1	1							1		1			1						M
2019	Rodrigues et al	Colonisation of plastic pellets (nurdles) by E. coli at public bathing beaches	2019	Longniddry, Scotland	55.9788	-2.90276		1	1							1	1	1			1						M
2019	Rodrigues et al	Colonisation of plastic pellets (nurdles) by E. coli at public bathing beaches	2019	Gullane, Scotland	56.0412	-2.83539		1	1							1	1	1			1						M
2019	Rodrigues et al	Colonisation of plastic pellets (nurdles) by E. coli at public bathing beaches	2019	Yellow Craig, Scotland	56.0642	-2.77914		1	1							1	1	1			1						M
2019	Rodrigues et al	Colonisation of plastic pellets (nurdles) by E. coli at public bathing beaches	2019	Broad Sands, Scotland	56.0622	-2.76322		1	1							1	1	1			1						M
2019	Rodrigues et al	Colonisation of plastic pellets (nurdles) by E. coli at public bathing beaches	2019	North Berwick, Scotland	56.059	-2.71341		1	1							1	1	1			1						M
2016	Turner	Heavy metals, metalloids and other hazardous elements in marine plastic litter	2016	Chapel Porth, England	50.301	-5.2366	1		1							1	1				1						M
2016	Turner	Heavy metals, metalloids and other hazardous elements in marine plastic litter	2016	Constantine Bay, England	50.5344	-5.02386	1		1							1	1				1						M
2016	Turner	Heavy metals, metalloids and other hazardous elements in marine plastic litter	2016	Porth Kidney, England	50.1963	-5.44149	1		1							1	1				1						M
2016	Turner	Heavy metals, metalloids and other hazardous elements in marine plastic litter	2016	Saltram, England	50.383	-4.09299	1		1							1	1				1						M
2016	Turner	Heavy metals, metalloids and other hazardous elements in marine plastic litter	2016	Mount Batten, England	50.3576	-4.12647	1		1							1	1				1	1					M
2016	Lavers et al	Factors influencing the detection of beach plastic debris	2016	Henderson Island (Pitcairn Island Group)	-24.3333	-128.317	1	1	1							1	1				1						M
2016	de Scisciolo et al	Beach debris on Aruba, Southern Caribbean: Attribution to local land-based and distal marine-based sources	2016	Arashi, Aruba	12.6105	-70.0534	1	1				1		1		1		1			1						M
2016	de Scisciolo et al	Beach debris on Aruba, Southern Caribbean: Attribution to local land-based and distal marine-based sources	2016	Eagle Beach, Aruba	12.5507	-70.0569	1	1				1		1		1		1			1						M
2016	de Scisciolo et al	Beach debris on Aruba, Southern Caribbean: Attribution to local land-based and distal marine-based sources	2016	Surfside Beach, Aruba	12.5122	-70.0313	1	1				1		1		1		1			1						M
2016	de Scisciolo et al	Beach debris on Aruba, Southern Caribbean: Attribution to local land-based and distal marine-based sources	2016	Mangel Halto, Aruba	12.4641	-69.9694	1	1				1		1		1		1			1						M
2016	de Scisciolo et al	Beach debris on Aruba, Southern Caribbean: Attribution to local land-based and distal marine-based sources	2016	Rodger's beach, Aruba	12.4176	-69.8844	1	1				1		1		1		1			1						M
2016	de Scisciolo et al	Beach debris on Aruba, Southern Caribbean: Attribution to local land-based and distal marine-based sources	2016	Lighthouse Dunes, Aruba	12.617	-70.0455	1	1				1		1		1		1			1						M
2016	de Scisciolo et al	Beach debris on Aruba, Southern Caribbean: Attribution to local land-based and distal marine-based sources	2016	Wariruri, Aruba	12.559	-69.9883	1	1				1		1		1		1			1						M
2016	de Scisciolo et al	Beach debris on Aruba, Southern Caribbean: Attribution to local land-based and distal marine-based sources	2016	Dos Playa, Aruba	12.5055	-69.9187	1	1				1		1		1		1			1						M
2016	de Scisciolo et al	Beach debris on Aruba, Southern Caribbean: Attribution to local land-based and distal marine-based sources	2016	Grapefield Beach, Aruba	12.4589	-69.8795	1	1				1		1		1		1			1						M
2016	de Scisciolo et al	Beach debris on Aruba, Southern Caribbean: Attribution to local land-based and distal marine-based sources	2016	Boca Grandi, Aruba	12.4395	-69.8739	1	1				1		1		1		1			1						M
2015	Duckett and Repaci	Marine plastic pollution: Using community science to address a global problem	2015	Avoca, New South Wales, Australia	-33.4641	151.436	1	1	1							1					1						M
2015	Duckett and Repaci	Marine plastic pollution: Using community science to address a global problem	2015	Long Reef, New South Wales, Australia	-33.745	151.307	1	1	1							1					1						M
2015	Duckett and Repaci	Marine plastic pollution: Using community science to address a global problem	2015	Freshwater, New South Wales, Australia	-33.7813	151.291	1	1	1							1					1						M
2015	Duckett and Repaci	Marine plastic pollution: Using community science to address a global problem	2015	Manly, New South Wales, Australia	-33.7919	151.288	1	1	1							1					1						M
2015	Duckett and Repaci	Marine plastic pollution: Using community science to address a global problem	2015	Cronulla, New South Wales, Australia	-34.0555	151.155	1	1	1							1					1						M
2019	Rangel-Buitrago et al	Marine debris occurrence along Las Salinas beach, Vina Del Mar (Chile): Magnitudes, impacts and management	2019	Chile, Vina Del Mar, Las Salinas Beach	-33.0045	-71.5508	1		1												1						M
2019	Edo et al	Occurrence and identification of microplastics along a beach in the Biosphere Reserve of Lanzarote	2019	Lambra Beach, La Graciosa Island, Canary Islands	29.279	-13.4959		1	1							1	1				1						M
2019	Ho and Not	Selective accumulation of plastic debris at the breaking wave area of coastal waters	2019	Lung Kwu Tan, Hong Kong	22.3883	113.92		1			0.5	1		1		1		1			1					1	M
2018	Rech et al	Travelling light: Fouling biota on macroplastics arriving on beaches of remote Rapa Nui (Easter Island) in the South Pacific Subtropical Gyre	2018	Anakena Beach, Rapa Nui	-27.0733	-109.323	1		1							1	1				1						M
2018	Rech et al	Travelling light: Fouling biota on macroplastics arriving on beaches of remote Rapa Nui (Easter Island) in the South Pacific Subtropical Gyre	2018	Ovahe Beach, Rapa Nui	-27.0739	-109.314	1		1							1	1				1						M
2018	Perez et al	A case study on the influence of beach kiosks on marine litter accumulating in Camboinhas Beach, Southeast Brazil	2018	Camboinhas Beach, Niteroi, Brazil	-22.962	-43.0562	1		1												1						M
2018	Rangel-Buitrago et al	Abundance and distribution of beach litter along the Atlantico Department, Caribbean coast of Colombia	2018	Punta Roca, Colombia	11.0455	-74.9212	1		1							1	1				1						M
2018	Rangel-Buitrago et al	Abundance and distribution of beach litter along the Atlantico Department, Caribbean coast of Colombia	2018	Salgar, Colombia	11.0228	-74.9306	1		1							1	1				1						M
2018	Rangel-Buitrago et al	Abundance and distribution of beach litter along the Atlantico Department, Caribbean coast of Colombia	2018	Pradomar, Colombia	11.0068	-74.9528	1		1							1	1				1						M
2018	Rangel-Buitrago et al	Abundance and distribution of beach litter along the Atlantico Department, Caribbean coast of Colombia	2018	Pradomar, Colombia	11.0035	-74.9536	1		1							1	1				1						M
2018	Rangel-Buitrago et al	Abundance and distribution of beach litter along the Atlantico Department, Caribbean coast of Colombia	2018	Puerto Colombia, Colombia	10.9996	-74.9537	1		1							1	1				1						M
2018	Rangel-Buitrago et al	Abundance and distribution of beach litter along the Atlantico Department, Caribbean coast of Colombia	2018	Puerto Colombia, Colombia	10.9894	-74.9618	1		1							1	1				1						M
2018	Rangel-Buitrago et al	Abundance and distribution of beach litter along the Atlantico Department, Caribbean coast of Colombia	2018	Puerto Velero, Colombia	10.9386	-75.0539	1		1							1	1				1						M
2018	Rangel-Buitrago et al	Abundance and distribution of beach litter along the Atlantico Department, Caribbean coast of Colombia	2018	Puerto Velero, Colombia	10.9449	-75.0398	1		1							1	1				1						M
2018	Rangel-Buitrago et al	Abundance and distribution of beach litter along the Atlantico Department, Caribbean coast of Colombia	2018	Puerto Velero, Colombia	10.9474	-75.0362	1		1							1	1				1						M
2018	Rangel-Buitrago et al	Abundance and distribution of beach litter along the Atlantico Department, Caribbean coast of Colombia	2018	Puerto Velero, Colombia	10.9512	-75.0293	1		1							1	1				1						M
2018	Rangel-Buitrago et al	Abundance and distribution of beach litter along the Atlantico Department, Caribbean coast of Colombia	2018	Cano Dulce, Colombia	10.9387	-75.0286	1		1							1	1				1						M
2018	Rangel-Buitrago et al	Abundance and distribution of beach litter along the Atlantico Department, Caribbean coast of Colombia	2018	Playa Mendoza, Colombia	10.9046	-75.0422	1		1							1	1				1						M
2018	Rangel-Buitrago et al	Abundance and distribution of beach litter along the Atlantico Department, Caribbean coast of Colombia	2018	Turipana, Colombia	10.8985	-75.0471	1		1							1	1				1						M
2018	Rangel-Buitrago et al	Abundance and distribution of beach litter along the Atlantico Department, Caribbean coast of Colombia	2018	Tubara, Colombia	10.8963	-75.0499	1		1							1	1				1						M
2018	Rangel-Buitrago et al	Abundance and distribution of beach litter along the Atlantico Department, Caribbean coast of Colombia	2018	Palmarito, Colombia	10.8933	-75.0545	1		1							1	1				1						M
2018	Rangel-Buitrago et al	Abundance and distribution of beach litter along the Atlantico Department, Caribbean coast of Colombia	2018	Playa Linda, Colombia	10.8918	-75.0587	1		1							1	1				1						M
2018	Rangel-Buitrago et al	Abundance and distribution of beach litter along the Atlantico Department, Caribbean coast of Colombia	2018	Santa Veronica, Colombia	10.8865	-75.077	1		1							1	1				1						M
2018	Rangel-Buitrago et al	Abundance and distribution of beach litter along the Atlantico Department, Caribbean coast of Colombia	2018	Santa Veronica, Colombia	10.8804	-75.0835	1		1							1	1				1						M
2018	Rangel-Buitrago et al	Abundance and distribution of beach litter along the Atlantico Department, Caribbean coast of Colombia	2018	Salinas del Ray, Colombia	10.8712	-75.1005	1		1							1	1				1						M
2018	Rangel-Buitrago et al	Abundance and distribution of beach litter along the Atlantico Department, Caribbean coast of Colombia	2018	Loma de Piedra, Colombia	10.8603	-75.1297	1		1							1	1				1						M
2018	Rangel-Buitrago et al	Abundance and distribution of beach litter along the Atlantico Department, Caribbean coast of Colombia	2018	Aguamarina, Colombia	10.8347	-75.152	1		1							1	1				1						M
2018	Rangel-Buitrago et al	Abundance and distribution of beach litter along the Atlantico Department, Caribbean coast of Colombia	2018	Bocatocinos, Colombia	10.8178	-75.2018	1		1							1	1				1						M
2018	Rangel-Buitrago et al	Abundance and distribution of beach litter along the Atlantico Department, Caribbean coast of Colombia	2018	Punta Astilleros, Colombia	10.7961	-75.2231	1		1							1	1				1						M
2018	Rangel-Buitrago et al	Abundance and distribution of beach litter along the Atlantico Department, Caribbean coast of Colombia	2018	Salinas de Galerazamba, Colombia	10.7964	-75.2457	1		1							1	1				1						M
2018	Rangel-Buitrago et al	Abundance and distribution of beach litter along the Atlantico Department, Caribbean coast of Colombia	2018	Galerazamba, Colombia	10.7899	-75.2635	1		1							1	1				1						M
2018	Ryan et al	Consistent patterns of debris on South African beaches indicate that industrial pellets and other mesoplastic items mostly derive from local sources	2018	Strandfontein, South Africa	-31.743	18.2218		1	1							1					1						M
2018	Ryan et al	Consistent patterns of debris on South African beaches indicate that industrial pellets and other mesoplastic items mostly derive from local sources	2018	Lambert's Bay, South Africa	-32.082	18.3146		1	1							1					1						M
2018	Ryan et al	Consistent patterns of debris on South African beaches indicate that industrial pellets and other mesoplastic items mostly derive from local sources	2018	Eland's Bay, South Africa	-32.3088	18.3412		1	1							1					1						M
2018	Ryan et al	Consistent patterns of debris on South African beaches indicate that industrial pellets and other mesoplastic items mostly derive from local sources	2018	Rocher Pan, South Africa	-32.6107	18.2925		1	1							1					1						M
2018	Ryan et al	Consistent patterns of debris on South African beaches indicate that industrial pellets and other mesoplastic items mostly derive from local sources	2018	Paternoster, South Africa	-32.8019	17.9024		1	1							1					1						M
2018	Ryan et al	Consistent patterns of debris on South African beaches indicate that industrial pellets and other mesoplastic items mostly derive from local sources	2018	Yzerfontein, South Africa	-33.2133	18.0818		1		1				1		1					1						M
2018	Ryan et al	Consistent patterns of debris on South African beaches indicate that industrial pellets and other mesoplastic items mostly derive from local sources	2018	Koeberg, South Africa	-33.6526	18.4166		1		1				1		1					1						M
2018	Ryan et al	Consistent patterns of debris on South African beaches indicate that industrial pellets and other mesoplastic items mostly derive from local sources	2018	Melkbosstrand, South Africa	-33.7423	18.4396		1		1				1		1					1						M
2018	Ryan et al	Consistent patterns of debris on South African beaches indicate that industrial pellets and other mesoplastic items mostly derive from local sources	2018	Milnerton, South Africa	-33.8784	18.4878		1		1				1		1					1						M
2018	Ryan et al	Consistent patterns of debris on South African beaches indicate that industrial pellets and other mesoplastic items mostly derive from local sources	2018	Olifantsbos, South Africa	-34.2679	18.3838		1		1				1		1					1						M
2018	Ryan et al	Consistent patterns of debris on South African beaches indicate that industrial pellets and other mesoplastic items mostly derive from local sources	2018	Muizenberg, South Africa	-34.0985	18.5004		1		1				1		1					1						M
2018	Ryan et al	Consistent patterns of debris on South African beaches indicate that industrial pellets and other mesoplastic items mostly derive from local sources	2018	Strand, South Africa	-34.0926	18.7976		1		1				1		1					1						M
2018	Ryan et al	Consistent patterns of debris on South African beaches indicate that industrial pellets and other mesoplastic items mostly derive from local sources	2018	Kleinmond, South Africa	-34.3423	19.0467		1		1				1		1					1						M
2018	Ryan et al	Consistent patterns of debris on South African beaches indicate that industrial pellets and other mesoplastic items mostly derive from local sources	2018	Hermanus, South Africa	-34.4147	19.2896		1		1				1		1					1						M
2018	Ryan et al	Consistent patterns of debris on South African beaches indicate that industrial pellets and other mesoplastic items mostly derive from local sources	2018	Die Plaat, South Africa	-34.5436	19.379		1		1				1		1					1						M
2018	Ryan et al	Consistent patterns of debris on South African beaches indicate that industrial pellets and other mesoplastic items mostly derive from local sources	2018	Franskraal, South Africa	-34.6059	19.4076		1		1				1		1					1						M
2018	Ryan et al	Consistent patterns of debris on South African beaches indicate that industrial pellets and other mesoplastic items mostly derive from local sources	2018	Pearly Beach, South Africa	-34.6703	19.5175		1		1				1		1					1						M
2018	Ryan et al	Consistent patterns of debris on South African beaches indicate that industrial pellets and other mesoplastic items mostly derive from local sources	2018	Quoin Point, South Africa	-34.7603	19.6368		1		1				1		1					1						M
2018	Ryan et al	Consistent patterns of debris on South African beaches indicate that industrial pellets and other mesoplastic items mostly derive from local sources	2018	Die Dam, South Africa	-34.7627	19.6915		1		1				1		1					1						M
2018	Ryan et al	Consistent patterns of debris on South African beaches indicate that industrial pellets and other mesoplastic items mostly derive from local sources	2018	Brandfontein, South Africa	-34.769	19.8806		1		1				1		1					1						M
2018	Ryan et al	Consistent patterns of debris on South African beaches indicate that industrial pellets and other mesoplastic items mostly derive from local sources	2018	Struisbaai, South Africa	-34.7947	20.0495		1		1				1		1					1						M
2018	Ryan et al	Consistent patterns of debris on South African beaches indicate that industrial pellets and other mesoplastic items mostly derive from local sources	2018	Die Mond, South Africa	-34.7109	20.1272		1		1				1		1					1						M
2018	Ryan et al	Consistent patterns of debris on South African beaches indicate that industrial pellets and other mesoplastic items mostly derive from local sources	2018	Hoop Punt, South Africa	-34.6121	20.323		1		1				1		1					1						M
2018	Ryan et al	Consistent patterns of debris on South African beaches indicate that industrial pellets and other mesoplastic items mostly derive from local sources	2018	Skip Skop, South Africa	-34.5552	20.4108		1		1				1		1					1						M
2018	Ryan et al	Consistent patterns of debris on South African beaches indicate that industrial pellets and other mesoplastic items mostly derive from local sources	2018	Koppie Alleen, South Africa	-34.4832	20.496		1		1				1		1					1						M
2018	Ryan et al	Consistent patterns of debris on South African beaches indicate that industrial pellets and other mesoplastic items mostly derive from local sources	2018	Witsand, South Africa	-34.3982	20.8526		1		1				1		1					1						M
2018	Ryan et al	Consistent patterns of debris on South African beaches indicate that industrial pellets and other mesoplastic items mostly derive from local sources	2018	Stilbaai, South Africa	-34.3714	21.4346		1		1				1		1					1						M
2018	Ryan et al	Consistent patterns of debris on South African beaches indicate that industrial pellets and other mesoplastic items mostly derive from local sources	2018	Visbaai, South Africa	-34.3264	21.904		1		1				1		1					1						M
2018	Ryan et al	Consistent patterns of debris on South African beaches indicate that industrial pellets and other mesoplastic items mostly derive from local sources	2018	Vleesbaai, South Africa	-34.2858	21.912		1		1				1		1					1						M
2018	Ryan et al	Consistent patterns of debris on South African beaches indicate that industrial pellets and other mesoplastic items mostly derive from local sources	2018	Dana Bay, South Africa	-34.2078	22.0286		1		1				1		1					1						M
2018	Ryan et al	Consistent patterns of debris on South African beaches indicate that industrial pellets and other mesoplastic items mostly derive from local sources	2018	Diaz Beach, South Africa	-34.154	22.1105		1		1				1		1					1						M
2018	Ryan et al	Consistent patterns of debris on South African beaches indicate that industrial pellets and other mesoplastic items mostly derive from local sources	2018	Klein Brak River, South Africa	-34.0894	22.151		1		1				1		1					1						M
2018	Ryan et al	Consistent patterns of debris on South African beaches indicate that industrial pellets and other mesoplastic items mostly derive from local sources	2018	Groot Brak River, South Africa	-34.0583	22.232		1		1				1		1					1						M
2018	Ryan et al	Consistent patterns of debris on South African beaches indicate that industrial pellets and other mesoplastic items mostly derive from local sources	2018	Glentana, South Africa	-34.0509	22.3133		1		1				1		1					1						M
2018	Ryan et al	Consistent patterns of debris on South African beaches indicate that industrial pellets and other mesoplastic items mostly derive from local sources	2018	Wilderness, South Africa	-34.9959	22.5692		1		1				1		1					1						M
2018	Ryan et al	Consistent patterns of debris on South African beaches indicate that industrial pellets and other mesoplastic items mostly derive from local sources	2018	Plettenberg Bay, South Africa	-34.0825	23.3709		1		1				1		1					1						M
2018	Ryan et al	Consistent patterns of debris on South African beaches indicate that industrial pellets and other mesoplastic items mostly derive from local sources	2018	Keurboomstrand, South Africa	-34.0057	23.4491		1		1				1		1					1						M
2018	Ryan et al	Consistent patterns of debris on South African beaches indicate that industrial pellets and other mesoplastic items mostly derive from local sources	2018	Nature's Valley, South Africa	-33.9817	23.5656		1		1				1		1					1						M
2018	Ryan et al	Consistent patterns of debris on South African beaches indicate that industrial pellets and other mesoplastic items mostly derive from local sources	2018	Oyster Bay, South Africa	-34.1728	24.6476		1		1				1		1					1						M
2018	Ryan et al	Consistent patterns of debris on South African beaches indicate that industrial pellets and other mesoplastic items mostly derive from local sources	2018	Cape St. Francis, South Africa	-34.2012	24.8351		1		1				1		1					1						M
2018	Ryan et al	Consistent patterns of debris on South African beaches indicate that industrial pellets and other mesoplastic items mostly derive from local sources	2018	Krom River, South Africa	-34.1655	24.8318		1		1				1		1					1						M
2018	Ryan et al	Consistent patterns of debris on South African beaches indicate that industrial pellets and other mesoplastic items mostly derive from local sources	2018	Kabeljous, South Africa	-34.0138	24.9297		1		1				1		1					1						M
2018	Ryan et al	Consistent patterns of debris on South African beaches indicate that industrial pellets and other mesoplastic items mostly derive from local sources	2018	Gamtoos River, South Africa	-33.9674	25.0554		1		1				1		1					1						M
2018	Ryan et al	Consistent patterns of debris on South African beaches indicate that industrial pellets and other mesoplastic items mostly derive from local sources	2018	van Stadens River, South Africa	-33.9711	25.226		1		1				1		1					1						M
2018	Ryan et al	Consistent patterns of debris on South African beaches indicate that industrial pellets and other mesoplastic items mostly derive from local sources	2018	Sardinia Bay, South Africa	-34.0349	25.5013		1		1				1		1					1						M
2018	Ryan et al	Consistent patterns of debris on South African beaches indicate that industrial pellets and other mesoplastic items mostly derive from local sources	2018	Cape Recife, South Africa	-34.0256	25.6661		1		1				1		1					1						M
2018	Ryan et al	Consistent patterns of debris on South African beaches indicate that industrial pellets and other mesoplastic items mostly derive from local sources	2018	King's Beach, South Africa	-33.9655	25.6454		1		1				1		1					1						M
2018	Ryan et al	Consistent patterns of debris on South African beaches indicate that industrial pellets and other mesoplastic items mostly derive from local sources	2018	Swartkops, South Africa	-33.8522	25.6404		1		1				1		1					1						M
2018	Ryan et al	Consistent patterns of debris on South African beaches indicate that industrial pellets and other mesoplastic items mostly derive from local sources	2018	Coega, South Africa	-33.84	25.6489		1		1				1		1					1						M
2018	Ryan et al	Consistent patterns of debris on South African beaches indicate that industrial pellets and other mesoplastic items mostly derive from local sources	2018	Sunday's River, South Africa	-33.72	25.8588		1		1				1		1					1						M
2018	Ryan et al	Consistent patterns of debris on South African beaches indicate that industrial pellets and other mesoplastic items mostly derive from local sources	2018	Woody Cape, South Africa	-33.7592	26.3911		1		1				1		1					1						M
2018	Ryan et al	Consistent patterns of debris on South African beaches indicate that industrial pellets and other mesoplastic items mostly derive from local sources	2018	Kenton on Sea, South Africa	-33.6838	26.6814		1		1				1		1					1						M
2018	Ryan et al	Consistent patterns of debris on South African beaches indicate that industrial pellets and other mesoplastic items mostly derive from local sources	2018	Port Alfred, South Africa	-33.5972	26.9057		1		1				1		1					1						M
2018	Ryan et al	Consistent patterns of debris on South African beaches indicate that industrial pellets and other mesoplastic items mostly derive from local sources	2018	Fish River, South Africa	-33.4994	27.1322		1		1				1		1					1						M
2018	Ryan et al	Consistent patterns of debris on South African beaches indicate that industrial pellets and other mesoplastic items mostly derive from local sources	2018	Madagascar Reef, South Africa	-33.3813	27.3286		1		1				1		1					1						M
2018	Ryan et al	Consistent patterns of debris on South African beaches indicate that industrial pellets and other mesoplastic items mostly derive from local sources	2018	Hamburg, South Africa	-33.2872	27.4823		1		1				1		1					1						M
2018	Ryan et al	Consistent patterns of debris on South African beaches indicate that industrial pellets and other mesoplastic items mostly derive from local sources	2018	Kayser's Beach, South Africa	-33.2061	27.6161		1		1				1		1					1						M
2018	Ryan et al	Consistent patterns of debris on South African beaches indicate that industrial pellets and other mesoplastic items mostly derive from local sources	2018	Kidd's Beach, South Africa	-33.1439	27.7023		1		1				1		1					1						M
2018	Ryan et al	Consistent patterns of debris on South African beaches indicate that industrial pellets and other mesoplastic items mostly derive from local sources	2018	Fuller's Bay, South Africa	-33.0567	27.8637		1		1				1		1					1						M
2018	Ryan et al	Consistent patterns of debris on South African beaches indicate that industrial pellets and other mesoplastic items mostly derive from local sources	2018	Eastern Beach, South Africa	-33.0073	27.9266		1		1				1		1					1						M
2018	Ryan et al	Consistent patterns of debris on South African beaches indicate that industrial pellets and other mesoplastic items mostly derive from local sources	2018	Sunrise-on-Sea, South Africa	-32.92	28.056		1		1				1		1					1						M
2018	Ryan et al	Consistent patterns of debris on South African beaches indicate that industrial pellets and other mesoplastic items mostly derive from local sources	2018	Morgan's Bay, South Africa	-32.7086	28.3479		1		1				1		1					1						M
2018	Ryan et al	Consistent patterns of debris on South African beaches indicate that industrial pellets and other mesoplastic items mostly derive from local sources	2018	Port St. Johns, South Africa	-31.6476	29.521		1	1							1					1						M
2018	Ryan et al	Consistent patterns of debris on South African beaches indicate that industrial pellets and other mesoplastic items mostly derive from local sources	2018	Wild Coast Sun, South Africa	-31.0956	30.1837		1	1							1					1						M
2018	Ryan et al	Consistent patterns of debris on South African beaches indicate that industrial pellets and other mesoplastic items mostly derive from local sources	2018	Trafalgar Beach, South Africa	-30.9466	30.3022		1	1							1					1						M
2018	Ryan et al	Consistent patterns of debris on South African beaches indicate that industrial pellets and other mesoplastic items mostly derive from local sources	2018	Oslo Beach, South Africa	-30.7513	30.4525		1	1							1					1						M
2018	Ryan et al	Consistent patterns of debris on South African beaches indicate that industrial pellets and other mesoplastic items mostly derive from local sources	2018	Mzumbe, South Africa	-30.6056	30.5546		1	1							1					1						M
2018	Ryan et al	Consistent patterns of debris on South African beaches indicate that industrial pellets and other mesoplastic items mostly derive from local sources	2018	Bazeley Beach, South Africa	-30.4493	30.6576		1	1							1					1						M
2018	Ryan et al	Consistent patterns of debris on South African beaches indicate that industrial pellets and other mesoplastic items mostly derive from local sources	2018	Scottburgh, South Africa	-30.2588	30.7725		1	1							1					1						M
2018	Ryan et al	Consistent patterns of debris on South African beaches indicate that industrial pellets and other mesoplastic items mostly derive from local sources	2018	Illovo Beach, South Africa	-30.1192	30.8514		1	1							1					1						M
2018	Ryan et al	Consistent patterns of debris on South African beaches indicate that industrial pellets and other mesoplastic items mostly derive from local sources	2018	Isipingo, South Africa	-29.991	30.9555		1	1							1					1						M
2018	Ryan et al	Consistent patterns of debris on South African beaches indicate that industrial pellets and other mesoplastic items mostly derive from local sources	2018	Durban Bluff, South Africa	-29.9089	31.0351		1	1							1					1						M
2018	Ryan et al	Consistent patterns of debris on South African beaches indicate that industrial pellets and other mesoplastic items mostly derive from local sources	2018	Mgeni River, South Africa	-29.8061	31.0427		1	1							1					1						M
2018	Ryan et al	Consistent patterns of debris on South African beaches indicate that industrial pellets and other mesoplastic items mostly derive from local sources	2018	Mhlanga Rocks, South Africa	-29.7347	31.0838		1	1							1					1						M
2018	Ryan et al	Consistent patterns of debris on South African beaches indicate that industrial pellets and other mesoplastic items mostly derive from local sources	2018	Mdloti (Mercy Bay), South Africa	-29.6443	31.1333		1	1							1					1						M
2018	Ryan et al	Consistent patterns of debris on South African beaches indicate that industrial pellets and other mesoplastic items mostly derive from local sources	2018	Ballito Beach, South Africa	-29.5521	31.2059		1	1							1					1						M
2018	Ryan et al	Consistent patterns of debris on South African beaches indicate that industrial pellets and other mesoplastic items mostly derive from local sources	2018	Blythedale Beach, South Africa	-29.3694	31.3545		1	1							1					1						M
2018	Ryan et al	Consistent patterns of debris on South African beaches indicate that industrial pellets and other mesoplastic items mostly derive from local sources	2018	Zinkwazi Beach, South Africa	-29.2778	31.4441		1	1							1					1						M
2018	Ryan et al	Consistent patterns of debris on South African beaches indicate that industrial pellets and other mesoplastic items mostly derive from local sources	2018	Mtunzini, South Africa	-28.9604	31.7746		1	1							1					1						M
2018	Ryan et al	Consistent patterns of debris on South African beaches indicate that industrial pellets and other mesoplastic items mostly derive from local sources	2018	Richard's Bay, South Africa	-28.7991	32.0986		1	1							1					1						M
2018	Ryan et al	Consistent patterns of debris on South African beaches indicate that industrial pellets and other mesoplastic items mostly derive from local sources	2018	St. Lucia, South Africa	-28.3654	32.4325		1	1							1					1						M
2018	Ryan et al	Consistent patterns of debris on South African beaches indicate that industrial pellets and other mesoplastic items mostly derive from local sources	2018	Cape Vidal, South Africa	-28.1338	32.5582		1	1							1					1						M
2018	Corraini et al	Troubles in paradise: Litter and its scenic impact on the North Santa Catarina island beaches, Brazil	2018	Daniela, Santa Catarina Island, Brazil	-27.4469	-48.5336	1		1							1					1						M
2018	Corraini et al	Troubles in paradise: Litter and its scenic impact on the North Santa Catarina island beaches, Brazil	2018	Forte, Santa Catarina Island, Brazil	-27.4348	-48.5201	1		1							1					1						M
2018	Corraini et al	Troubles in paradise: Litter and its scenic impact on the North Santa Catarina island beaches, Brazil	2018	Jurere, Santa Catarina Island, Brazil	-27.4363	-48.5028	1		1							1					1						M
2018	Corraini et al	Troubles in paradise: Litter and its scenic impact on the North Santa Catarina island beaches, Brazil	2018	Canasvieiras, Santa Catarina Island, Brazil	-27.4261	-48.4499	1		1							1					1						M
2018	Corraini et al	Troubles in paradise: Litter and its scenic impact on the North Santa Catarina island beaches, Brazil	2018	Ponta das Canas, Santa Catarina Island, Brazil	-27.396	-48.4336	1		1							1					1						M
2018	Corraini et al	Troubles in paradise: Litter and its scenic impact on the North Santa Catarina island beaches, Brazil	2018	Lagoinha do Norte, Santa Catarina Island, Brazil	-27.3892	-48.4251	1		1							1					1						M
2018	Corraini et al	Troubles in paradise: Litter and its scenic impact on the North Santa Catarina island beaches, Brazil	2018	Brava, Santa Catarina Island, Brazil	-27.4019	-48.4131	1		1							1					1						M
2018	Corraini et al	Troubles in paradise: Litter and its scenic impact on the North Santa Catarina island beaches, Brazil	2018	Ingleses, Santa Catarina Island, Brazil	-27.4376	-48.3888	1		1							1					1						M
2005	Santos et al	Influence of socio-economic characteristics of beach users on litter	2005	Cassino Beach, Rio Grande City, Brazil	-32.1833	-52.1667	1							1							1						M
2011	Carson et al	Small plastic debris changes water movement and heat transfer through beach sediments	2011	Kamilo Beach, Hawaii	18.971	-155.593		1	1							1	1		1		1						M
2011	Carson et al	Small plastic debris changes water movement and heat transfer through beach sediments	2011	Waikapuna Beach, Hawaii	19.0187	-155.574		1	1							1	1		1		1						M
2008	Ariza et al	Seasonal evolution of beach waste and litter during the bathing season on the Catalan coast	2008	Malgrat de Mar, Catalunya, Spain	41.6418	2.74435	1					1		1							1						M
2008	Ariza et al	Seasonal evolution of beach waste and litter during the bathing season on the Catalan coast	2008	S'Abanell, Catalunya, Spain	41.6672	2.78669	1					1		1							1						M
2008	Ariza et al	Seasonal evolution of beach waste and litter during the bathing season on the Catalan coast	2008	Blanes, Catalunya, Spain	41.6713	2.79072	1					1		1							1						M
2008	Ariza et al	Seasonal evolution of beach waste and litter during the bathing season on the Catalan coast	2008	Fenals, Catalunya, Spain	41.6947	2.83463	1					1		1							1						M
2008	Ariza et al	Seasonal evolution of beach waste and litter during the bathing season on the Catalan coast	2008	Lloret Centre, Catalunya, Spain	41.6992	2.85106	1	1				1		1							1						M
2008	Ariza et al	Seasonal evolution of beach waste and litter during the bathing season on the Catalan coast	2008	Es Codolar, Catalunya, Spain	41.7159	2.93252	1					1		1							1						M
2008	Ariza et al	Seasonal evolution of beach waste and litter during the bathing season on the Catalan coast	2008	Tossa-Mar Menuda, Catalunya, Spain	41.7222	2.93833	1					1		1							1						M
2008	Ariza et al	Seasonal evolution of beach waste and litter during the bathing season on the Catalan coast	2008	St. Francesc, Catalunya, Spain	41.6788	2.80716	1					1		1							1						M
2008	Ariza et al	Seasonal evolution of beach waste and litter during the bathing season on the Catalan coast	2008	Sta. Cristina, Catalunya, Spain	41.6883	2.81826	1					1		1							1						M
2008	Ariza et al	Seasonal evolution of beach waste and litter during the bathing season on the Catalan coast	2008	Canyelles, Catalunya, Spain	41.7043	2.88303	1					1		1							1						M
2008	Ariza et al	Seasonal evolution of beach waste and litter during the bathing season on the Catalan coast	2008	Sta. Maria de Llorell, Catalunya, Spain	41.7104	2.90355	1					1		1							1						M
2008	Ariza et al	Seasonal evolution of beach waste and litter during the bathing season on the Catalan coast	2008	Giverola, Catalunya, Spain	41.7373	2.95405	1					1		1							1						M
2008	Ariza et al	Seasonal evolution of beach waste and litter during the bathing season on the Catalan coast	2008	Salions, Catalunya, Spain	41.7478	2.96624	1					1		1							1						M
2017	Lavers and Bond	Exceptional and rapid accumulation of anthropogenic debris on one of the world's most remote and pristine islands	2017	North Beach, Henderson Island (Pitcairn Island Group)	-24.3391	-128.325	1	1					1	1							1					1	M
2017	Lavers and Bond	Exceptional and rapid accumulation of anthropogenic debris on one of the world's most remote and pristine islands	2017	East Beach, Henderson Island (Pitcairn Island Group)	-24.3567	-128.304	1	1	1												1					1	M
2004	Claereboudt	Shore litter along sandy beaches of the Gulf of Oman	2004	As Sawadi, Sultanate of Oman	23.7817	57.791	1					1		1		1	1				1						M
2004	Claereboudt	Shore litter along sandy beaches of the Gulf of Oman	2004	Barka, Sultanate of Oman	23.7259	57.8453	1					1		1		1	1				1						M
2004	Claereboudt	Shore litter along sandy beaches of the Gulf of Oman	2004	Manuma, Sultanate of Oman	23.7133	58.0714	1					1		1		1	1				1						M
2004	Claereboudt	Shore litter along sandy beaches of the Gulf of Oman	2004	Wadi Al-Iwami, Sultanate of Oman	23.7086	58.1174	1					1		1		1	1				1						M
2004	Claereboudt	Shore litter along sandy beaches of the Gulf of Oman	2004	As Seeb, Sultanate of Oman	23.6969	58.1535	1					1		1		1	1				1						M
2004	Claereboudt	Shore litter along sandy beaches of the Gulf of Oman	2004	Al Hail, Sultanate of Oman	23.641	58.2472	1					1		1		1	1				1						M
2004	Claereboudt	Shore litter along sandy beaches of the Gulf of Oman	2004	Al Athaiba, Sultanate of Oman	23.6041	58.3836	1					1		1		1	1				1						M
2004	Claereboudt	Shore litter along sandy beaches of the Gulf of Oman	2004	Gubrah, Sultanate of Oman	23.6033	58.4049	1					1		1		1	1				1						M
2004	Claereboudt	Shore litter along sandy beaches of the Gulf of Oman	2004	Qurm, Sultanate of Oman	23.6229	58.4753	1					1		1		1	1				1						M
2004	Claereboudt	Shore litter along sandy beaches of the Gulf of Oman	2004	Darsait, Sultanate of Oman	23.632	58.5418	1					1		1		1	1				1						M
2004	Claereboudt	Shore litter along sandy beaches of the Gulf of Oman	2004	Qantab, Sultanate of Oman	23.5623	58.6296	1					1		1		1	1				1						M
2011	Ivar do Sul et al	Plastic pollution at a sea turtle conservation area in NE Brazil: Contrasting developed and undeveloped beaches	2011	Forte, Bahia State, Brazil	-12.5783	-38.0038	1				1			1							1						M
2011	Ivar do Sul et al	Plastic pollution at a sea turtle conservation area in NE Brazil: Contrasting developed and undeveloped beaches	2011	Bolsao de Desova, Bahia State, Brazil	-12.5251	-37.977	1				1			1							1						M
2011	Ivar do Sul et al	Plastic pollution at a sea turtle conservation area in NE Brazil: Contrasting developed and undeveloped beaches	2011	Imbassai, Bahia State, Brazil	-12.4999	-37.9598	1				1			1							1						M
2011	Ivar do Sul et al	Plastic pollution at a sea turtle conservation area in NE Brazil: Contrasting developed and undeveloped beaches	2011	Santo Antonio, Bahia State, Brazil	-12.4584	-37.9319	1				1			1							1						M
2011	Ivar do Sul et al	Plastic pollution at a sea turtle conservation area in NE Brazil: Contrasting developed and undeveloped beaches	2011	Complexo Costa do Sauipe, Bahia State, Brazil	-12.4409	-37.9181	1				1			1							1						M
2011	Ivar do Sul et al	Plastic pollution at a sea turtle conservation area in NE Brazil: Contrasting developed and undeveloped beaches	2011	Porto de Sauipe, Bahia State, Brazil	-12.3878	-37.8789	1				1			1							1						M
2011	Ivar do Sul et al	Plastic pollution at a sea turtle conservation area in NE Brazil: Contrasting developed and undeveloped beaches	2011	Porto de Sauipe/Subauma, Bahia State, Brazil	-12.3099	-37.8261	1				1			1							1						M
2011	Ivar do Sul et al	Plastic pollution at a sea turtle conservation area in NE Brazil: Contrasting developed and undeveloped beaches	2011	Subauma, Bahia State, Brazil	-12.2389	-37.7718	1				1			1							1						M
2011	Ivar do Sul et al	Plastic pollution at a sea turtle conservation area in NE Brazil: Contrasting developed and undeveloped beaches	2011	Subauma/Baixio, Bahia State, Brazil	-12.1573	-37.7208	1				1			1							1						M
2011	Ivar do Sul et al	Plastic pollution at a sea turtle conservation area in NE Brazil: Contrasting developed and undeveloped beaches	2011	Baixio, Bahia State, Brazil	-12.1043	-37.6901	1				1			1							1						M
2011	Ivar do Sul et al	Plastic pollution at a sea turtle conservation area in NE Brazil: Contrasting developed and undeveloped beaches	2011	Baixio/Itariri, Bahia State, Brazil	-12.0094	-37.6398	1				1			1							1						M
2011	Ivar do Sul et al	Plastic pollution at a sea turtle conservation area in NE Brazil: Contrasting developed and undeveloped beaches	2011	Itariri/Sitio do Conde, Bahia State, Brazil	-11.9106	-37.5906	1				1			1							1						M
2011	Ivar do Sul et al	Plastic pollution at a sea turtle conservation area in NE Brazil: Contrasting developed and undeveloped beaches	2011	Sitio do Conde, Bahia State, Brazil	-11.8552	-37.5653	1				1			1							1						M
2018	Lo et al	Comparisons of microplastic pollution between mudflats and sandy beaches in Hong Kong	2018	Sha Kong Tsuen, Hong Kong	22.4614	113.983		1	1							1		1			1						M
2018	Lo et al	Comparisons of microplastic pollution between mudflats and sandy beaches in Hong Kong	2018	Ha Pak Nai, Hong Kong	22.4357	113.95		1	1							1		1			1						M
2018	Lo et al	Comparisons of microplastic pollution between mudflats and sandy beaches in Hong Kong	2018	Shan Tau, Hong Kong	22.2888	113.921		1	1							1		1			1						M
2018	Lo et al	Comparisons of microplastic pollution between mudflats and sandy beaches in Hong Kong	2018	Shum Wat, Hong Kong	22.2712	113.886		1	1							1		1			1						M
2018	Lo et al	Comparisons of microplastic pollution between mudflats and sandy beaches in Hong Kong	2018	Tai O, Hong Kong	22.2559	113.862		1	1							1		1			1						M
2018	Lo et al	Comparisons of microplastic pollution between mudflats and sandy beaches in Hong Kong	2018	Luk Keng, Hong Kong	22.5244	114.216		1	1							1		1			1						M
2018	Lo et al	Comparisons of microplastic pollution between mudflats and sandy beaches in Hong Kong	2018	Lai Chi Wo, Hong Kong	22.5271	114.262		1	1							1		1			1						M
2018	Lo et al	Comparisons of microplastic pollution between mudflats and sandy beaches in Hong Kong	2018	Chek Keng, Hong Kong	22.4241	114.351		1	1							1		1			1						M
2018	Lo et al	Comparisons of microplastic pollution between mudflats and sandy beaches in Hong Kong	2018	Wong Yi Chau, Hong Kong	22.3862	114.317		1	1							1		1			1						M
2018	Lo et al	Comparisons of microplastic pollution between mudflats and sandy beaches in Hong Kong	2018	Ho Chung, Hong Kong	22.3542	114.252		1	1							1		1			1						M
2018	Lo et al	Comparisons of microplastic pollution between mudflats and sandy beaches in Hong Kong	2018	Tai Pai Tsui, Hong Kong	22.3434	114.06		1	1							1		1			1						M
2018	Lo et al	Comparisons of microplastic pollution between mudflats and sandy beaches in Hong Kong	2018	Luk Keng Tsuen, Hong Kong	22.3314	114.023		1	1							1		1			1						M
2018	Lo et al	Comparisons of microplastic pollution between mudflats and sandy beaches in Hong Kong	2018	Sha Lo Wan, Hong Kong	22.2901	113.901		1	1							1		1			1						M
2018	Lo et al	Comparisons of microplastic pollution between mudflats and sandy beaches in Hong Kong	2018	Yi O, Hong Kong	22.2357	113.85		1	1							1		1			1						M
2018	Lo et al	Comparisons of microplastic pollution between mudflats and sandy beaches in Hong Kong	2018	Shui Hau Wan, Hong Kong	22.2193	113.919		1	1							1		1			1						M
2018	Lo et al	Comparisons of microplastic pollution between mudflats and sandy beaches in Hong Kong	2018	Lai Chi Chong, Hong Kong	22.4528	114.3		1	1							1		1			1						M
2018	Lo et al	Comparisons of microplastic pollution between mudflats and sandy beaches in Hong Kong	2018	Tai Tan, Hong Kong	22.4394	114.333		1	1							1		1			1						M
2018	Lo et al	Comparisons of microplastic pollution between mudflats and sandy beaches in Hong Kong	2018	Tsam Chuk Wan, Hong Kong	22.3841	114.316		1	1							1		1			1						M
2018	Lo et al	Comparisons of microplastic pollution between mudflats and sandy beaches in Hong Kong	2018	Pa Sha Wan, Hong Kong	22.3672	114.291		1	1							1		1			1						M
2018	Lo et al	Comparisons of microplastic pollution between mudflats and sandy beaches in Hong Kong	2018	Tai Tam Wan, Hong Kong	22.2186	114.236		1	1							1		1			1						M
2019	Costa et al	Can the Atlantic ghost crab be a potential biomonitor of microplastics pollution of sandy beaches sediment?	2019	Grussai Beach Arch, Brazil	-21.6889	-41.0231		1			1	1		1		1	1				1						M
2019	Costa et al	Can the Atlantic ghost crab be a potential biomonitor of microplastics pollution of sandy beaches sediment?	2019	Grussai Beach Arch, Brazil	-21.6944	-41.0238		1			1	1		1		1	1				1						M
2019	Costa et al	Can the Atlantic ghost crab be a potential biomonitor of microplastics pollution of sandy beaches sediment?	2019	Grussai Beach Arch, Brazil	-21.7044	-41.0251		1			1	1		1		1	1				1						M
2019	Costa et al	Can the Atlantic ghost crab be a potential biomonitor of microplastics pollution of sandy beaches sediment?	2019	Grussai Beach Arch, Brazil	-21.7097	-41.0255		1			1	1		1		1	1				1						M
2019	Costa et al	Can the Atlantic ghost crab be a potential biomonitor of microplastics pollution of sandy beaches sediment?	2019	Grussai Beach Arch, Brazil	-21.7284	-41.0252		1			1	1		1		1	1				1						M
2019	Costa et al	Can the Atlantic ghost crab be a potential biomonitor of microplastics pollution of sandy beaches sediment?	2019	Grussai Beach Arch, Brazil	-21.7473	-41.0226		1			1	1		1		1	1				1						M
2019	Nabizadeh et al	Microplastic pollution on the Persian Gulf shoreline: A case study of Bandar Abbas city, Hormozgan Province, Iran	2019	Bandar Abbas City, Iran	27.1771	56.2813		1	1							1					1						M
2019	Nabizadeh et al	Microplastic pollution on the Persian Gulf shoreline: A case study of Bandar Abbas city, Hormozgan Province, Iran	2019	Bandar Abbas City, Iran	27.0797	56.0037		1	1							1					1						M
2019	Nabizadeh et al	Microplastic pollution on the Persian Gulf shoreline: A case study of Bandar Abbas city, Hormozgan Province, Iran	2019	Bandar Abbas City, Iran	27.0202	55.8951		1	1							1					1						M
2019	Bayo et al	Abundance, morphology and chemical composition of microplastics in sand and sediments from a protected coastal area: The Mar Menor lagoon (SE Spain)	2019	Playa Honda, Spain	37.6319	-0.736389		1		1				1							1					1	M
2019	Bayo et al	Abundance, morphology and chemical composition of microplastics in sand and sediments from a protected coastal area: The Mar Menor lagoon (SE Spain)	2019	Playa Paraiso, Spain	37.6344	-0.728056		1		1				1							1					1	M
2019	Bayo et al	Abundance, morphology and chemical composition of microplastics in sand and sediments from a protected coastal area: The Mar Menor lagoon (SE Spain)	2019	Salinas Marchamalo Interior, Spain	37.6342	-0.726667		1		1				1							1					1	M
2019	Bayo et al	Abundance, morphology and chemical composition of microplastics in sand and sediments from a protected coastal area: The Mar Menor lagoon (SE Spain)	2019	Mar de Cristal, Spain	37.6425	-0.760556		1		1				1							1					1	M
2019	Bayo et al	Abundance, morphology and chemical composition of microplastics in sand and sediments from a protected coastal area: The Mar Menor lagoon (SE Spain)	2019	Islas Menores, Spain	37.6464	-0.769722		1		1				1							1					1	M
2019	Bayo et al	Abundance, morphology and chemical composition of microplastics in sand and sediments from a protected coastal area: The Mar Menor lagoon (SE Spain)	2019	Los Nietos, Spain	37.6494	-0.7825		1		1				1							1					1	M
2019	Bayo et al	Abundance, morphology and chemical composition of microplastics in sand and sediments from a protected coastal area: The Mar Menor lagoon (SE Spain)	2019	Saladar Lo Poyo Litoral, Spain	37.6667	-0.814444		1		1				1							1					1	M
2019	Bayo et al	Abundance, morphology and chemical composition of microplastics in sand and sediments from a protected coastal area: The Mar Menor lagoon (SE Spain)	2019	Saladar Lo Poyo Interior, Spain	37.6664	-0.814444		1		1				1							1					1	M
2019	Bayo et al	Abundance, morphology and chemical composition of microplastics in sand and sediments from a protected coastal area: The Mar Menor lagoon (SE Spain)	2019	Playa La Perla, Spain	37.6703	-0.819444		1		1				1							1					1	M
2019	Bayo et al	Abundance, morphology and chemical composition of microplastics in sand and sediments from a protected coastal area: The Mar Menor lagoon (SE Spain)	2019	Los Urrutias, Spain	37.6786	-0.826667		1		1				1							1					1	M
2019	Bayo et al	Abundance, morphology and chemical composition of microplastics in sand and sediments from a protected coastal area: The Mar Menor lagoon (SE Spain)	2019	La Manga, Spain	37.6861	-0.737778		1		1				1							1					1	M
2019	Bayo et al	Abundance, morphology and chemical composition of microplastics in sand and sediments from a protected coastal area: The Mar Menor lagoon (SE Spain)	2019	Marina del Carmoli Interior Sur, Spain	37.705	-0.85		1		1				1							1					1	M
2019	Bayo et al	Abundance, morphology and chemical composition of microplastics in sand and sediments from a protected coastal area: The Mar Menor lagoon (SE Spain)	2019	Marina del Carmoli Litoral Sur, Spain	37.7056	-0.849444		1		1				1							1					1	M
2019	Bayo et al	Abundance, morphology and chemical composition of microplastics in sand and sediments from a protected coastal area: The Mar Menor lagoon (SE Spain)	2019	Marina del Carmoli Interior Norte, Spain	37.7125	-0.856944		1		1				1							1					1	M
2019	Bayo et al	Abundance, morphology and chemical composition of microplastics in sand and sediments from a protected coastal area: The Mar Menor lagoon (SE Spain)	2019	Marina del Carmoli Litoral Norte, Spain	37.7128	-0.856667		1		1				1							1					1	M
2019	Bayo et al	Abundance, morphology and chemical composition of microplastics in sand and sediments from a protected coastal area: The Mar Menor lagoon (SE Spain)	2019	Los Narejos, Spain, Spain	37.7567	-0.826944		1		1				1							1					1	M
2019	Bayo et al	Abundance, morphology and chemical composition of microplastics in sand and sediments from a protected coastal area: The Mar Menor lagoon (SE Spain)	2019	Santiago de la Ribera	37.7972	-0.803333		1		1				1							1					1	M
2019	Yabanli et al	Microplastic pollution at the intersection of the Aegean and Mediterranean Seas: A study of the Datca Peninsula (Turkey)	2019	Aktur Beach, Turkey	36.7553	27.8889		1	1							1		1			1						M
2019	Yabanli et al	Microplastic pollution at the intersection of the Aegean and Mediterranean Seas: A study of the Datca Peninsula (Turkey)	2019	Ovabuku Beach, Turkey	36.6811	27.5581		1	1							1		1			1						M
2019	Yabanli et al	Microplastic pollution at the intersection of the Aegean and Mediterranean Seas: A study of the Datca Peninsula (Turkey)	2019	Surf Camping, Turkey	36.7628	27.7339		1	1							1		1			1						M
2019	Yabanli et al	Microplastic pollution at the intersection of the Aegean and Mediterranean Seas: A study of the Datca Peninsula (Turkey)	2019	Kurucabuk, Turkey	36.7556	27.9083		1	1							1		1			1						M
2017	Coppock et al	A small-scale, portable method for extracting microplastics from marine sediments	2017	Portwinkle Beach, Cornwall, England	50.3608	-4.30636		1	1									1			1						M
2019	Covernton et al	Microplastics in bivalves and their habitat in relation to shellfish aquaculture proximity in coastal British Columbia, Canada	2019	Hyacinthe Bay, British Columbia, Canada	50.12	-125.229	1	1	1									1			1					1	M
2019	Covernton et al	Microplastics in bivalves and their habitat in relation to shellfish aquaculture proximity in coastal British Columbia, Canada	2019	Hyacinthe Bay, British Columbia, Canada	50.1212	-125.235	1	1	1									1			1					1	M
2019	Covernton et al	Microplastics in bivalves and their habitat in relation to shellfish aquaculture proximity in coastal British Columbia, Canada	2019	Sawmill Bay, British Columbia, Canada	50.1987	-125.064	1	1	1									1			1					1	M
2019	Covernton et al	Microplastics in bivalves and their habitat in relation to shellfish aquaculture proximity in coastal British Columbia, Canada	2019	Sawmill Bay, British Columbia, Canada	50.1954	-125.066	1	1	1									1			1					1	M
2019	Covernton et al	Microplastics in bivalves and their habitat in relation to shellfish aquaculture proximity in coastal British Columbia, Canada	2019	Joyce Point, British Columbia, Canada	50.1729	-124.902	1	1	1									1			1					1	M
2019	Covernton et al	Microplastics in bivalves and their habitat in relation to shellfish aquaculture proximity in coastal British Columbia, Canada	2019	Coode Peninsula, British Columbia, Canada	50.0188	-124.729	1	1	1									1			1					1	M
2019	Covernton et al	Microplastics in bivalves and their habitat in relation to shellfish aquaculture proximity in coastal British Columbia, Canada	2019	Coode Peninsula, British Columbia, Canada	50.025	-124.736	1	1	1									1			1					1	M
2019	Covernton et al	Microplastics in bivalves and their habitat in relation to shellfish aquaculture proximity in coastal British Columbia, Canada	2019	Okeover Inlet, British Columbia, Canada	49.9732	-124.69	1	1	1									1			1					1	M
2019	Covernton et al	Microplastics in bivalves and their habitat in relation to shellfish aquaculture proximity in coastal British Columbia, Canada	2019	Okeover Inlet, British Columbia, Canada	49.9665	-124.685	1	1	1									1			1					1	M
2019	Covernton et al	Microplastics in bivalves and their habitat in relation to shellfish aquaculture proximity in coastal British Columbia, Canada	2019	Ships Point, British Columbia, Canada	49.5043	-124.809	1	1	1									1			1					1	M
2019	Covernton et al	Microplastics in bivalves and their habitat in relation to shellfish aquaculture proximity in coastal British Columbia, Canada	2019	Ships Point, British Columbia, Canada	49.5024	-124.811	1	1	1									1			1					1	M
2019	Covernton et al	Microplastics in bivalves and their habitat in relation to shellfish aquaculture proximity in coastal British Columbia, Canada	2019	Mud Bay, British Columbia, Canada	49.4683	-124.769	1	1	1									1			1					1	M
2019	Covernton et al	Microplastics in bivalves and their habitat in relation to shellfish aquaculture proximity in coastal British Columbia, Canada	2019	Mud Bay, British Columbia, Canada	49.4697	-124.776	1	1	1									1			1					1	M
2019	Covernton et al	Microplastics in bivalves and their habitat in relation to shellfish aquaculture proximity in coastal British Columbia, Canada	2019	Deep Bay, British Columbia, Canada	49.4589	-124.746	1	1	1									1			1					1	M
2019	Covernton et al	Microplastics in bivalves and their habitat in relation to shellfish aquaculture proximity in coastal British Columbia, Canada	2019	Deep Bay, British Columbia, Canada	49.4617	-124.731	1	1	1									1			1					1	M
2019	Covernton et al	Microplastics in bivalves and their habitat in relation to shellfish aquaculture proximity in coastal British Columbia, Canada	2019	Ladysmith, British Columbia, Canada	48.9896	-123.761	1	1	1									1			1					1	M
2019	Covernton et al	Microplastics in bivalves and their habitat in relation to shellfish aquaculture proximity in coastal British Columbia, Canada	2019	Meares Island, British Columbia, Canada	49.1881	-125.892	1	1	1									1			1					1	M
2019	Covernton et al	Microplastics in bivalves and their habitat in relation to shellfish aquaculture proximity in coastal British Columbia, Canada	2019	Meares Island, British Columbia, Canada	49.1878	-125.881	1	1	1									1			1					1	M
2019	Simon-Sanchez et al	River Deltas as hotspots of microplastic accumulation: The case study of the Ebro River (NW Mediterranean)	2019	Spain	40.7356	0.863472		1	1							1		1			1						M
2019	Simon-Sanchez et al	River Deltas as hotspots of microplastic accumulation: The case study of the Ebro River (NW Mediterranean)	2019	Spain	40.7307	0.841889		1	1							1		1			1						M
2019	Simon-Sanchez et al	River Deltas as hotspots of microplastic accumulation: The case study of the Ebro River (NW Mediterranean)	2019	Spain	40.7336	0.828831		1	1							1		1			1						M
2019	Simon-Sanchez et al	River Deltas as hotspots of microplastic accumulation: The case study of the Ebro River (NW Mediterranean)	2019	Spain	40.7619	0.797965		1	1							1		1			1						M
2019	Simon-Sanchez et al	River Deltas as hotspots of microplastic accumulation: The case study of the Ebro River (NW Mediterranean)	2019	Spain	40.8455	0.75127		1	1							1		1			1						M
2019	Curren and Leong	Profiles of bacterial assemblages from microplastics of tropical coastal environments	2019	Lazarus Island, Singapore	1.22447	103.852		1	1							1					1						M
2019	Curren and Leong	Profiles of bacterial assemblages from microplastics of tropical coastal environments	2019	Sembawang Beach, Singapore	1.46381	103.837		1	1							1					1						M
2019	Curren and Leong	Profiles of bacterial assemblages from microplastics of tropical coastal environments	2019	Changi Beach, Singapore	1.39242	103.979		1	1							1					1						M
2019	Hansen and Gross	Determination of microplastics in coastal beach sediments along Kattegat Sea, Denmark	2019	Mou, Denmark	56.9814	10.307		1	1							1	1		1		1						M
2019	Hansen and Gross	Determination of microplastics in coastal beach sediments along Kattegat Sea, Denmark	2019	Bogense, Denmark	55.5416	10.0086		1	1							1	1		1		1						M
2019	Hansen and Gross	Determination of microplastics in coastal beach sediments along Kattegat Sea, Denmark	2019	Hasmark, Denmark	55.5564	10.4805		1	1							1	1		1		1						M
2019	Hansen and Gross	Determination of microplastics in coastal beach sediments along Kattegat Sea, Denmark	2019	Zealand Odde, Denmark	55.9843	11.3198		1	1							1	1		1		1						M
2019	Hansen and Gross	Determination of microplastics in coastal beach sediments along Kattegat Sea, Denmark	2019	Rorvig, Denmark	55.9532	11.7167		1	1							1	1		1		1						M
2018	Pinon-Colin et al	Microplastics on sandy beaches of the Baja California Peninsula, Mexico	2018	Playas de Tijuana, Mexico	32.534	-117.124		1	1							1					1						M
2018	Pinon-Colin et al	Microplastics on sandy beaches of the Baja California Peninsula, Mexico	2018	Playas de Rosarito, Mexico	32.3607	-117.07		1	1							1					1						M
2018	Pinon-Colin et al	Microplastics on sandy beaches of the Baja California Peninsula, Mexico	2018	La Mision, Mexico	32.0934	-116.884		1	1							1					1						M
2018	Pinon-Colin et al	Microplastics on sandy beaches of the Baja California Peninsula, Mexico	2018	Ensenada, Mexico	31.8393	-116.612		1	1							1					1						M
2018	Pinon-Colin et al	Microplastics on sandy beaches of the Baja California Peninsula, Mexico	2018	Punta Banda, Mexico	31.7564	-116.632		1	1							1					1						M
2018	Pinon-Colin et al	Microplastics on sandy beaches of the Baja California Peninsula, Mexico	2018	Vincente Guerrero, Mexico	30.7063	-116.037		1	1							1					1						M
2018	Pinon-Colin et al	Microplastics on sandy beaches of the Baja California Peninsula, Mexico	2018	Santa Maria, Mexico	30.3993	-115.913		1	1							1					1						M
2018	Pinon-Colin et al	Microplastics on sandy beaches of the Baja California Peninsula, Mexico	2018	El Socorrito, Mexico	30.3178	-115.826		1	1							1					1						M
2018	Pinon-Colin et al	Microplastics on sandy beaches of the Baja California Peninsula, Mexico	2018	Valle Tranquilo, Mexico	30.2361	-115.795		1	1							1					1						M
2018	Pinon-Colin et al	Microplastics on sandy beaches of the Baja California Peninsula, Mexico	2018	Guerrero Negro, Mexico	28.0316	-114.116		1	1							1					1						M
2018	Pinon-Colin et al	Microplastics on sandy beaches of the Baja California Peninsula, Mexico	2018	Todos los Santos, Mexico	23.4234	-110.23		1	1							1					1						M
2018	Pinon-Colin et al	Microplastics on sandy beaches of the Baja California Peninsula, Mexico	2018	Cabo San Lucas, Mexico	22.8851	-109.906		1	1							1					1						M
2018	Pinon-Colin et al	Microplastics on sandy beaches of the Baja California Peninsula, Mexico	2018	San Felipe, Mexico	31.0275	-114.835		1	1							1					1						M
2018	Pinon-Colin et al	Microplastics on sandy beaches of the Baja California Peninsula, Mexico	2018	La Perla, Mexico	30.9416	-114.731		1	1							1					1						M
2018	Pinon-Colin et al	Microplastics on sandy beaches of the Baja California Peninsula, Mexico	2018	Playa La Gringa, Mexico	29.0389	-113.549		1	1							1					1						M
2018	Pinon-Colin et al	Microplastics on sandy beaches of the Baja California Peninsula, Mexico	2018	Bahia de los Angeles, Mexico	28.9533	-113.558		1	1							1					1						M
2018	Pinon-Colin et al	Microplastics on sandy beaches of the Baja California Peninsula, Mexico	2018	Ejido San Lucas, Mexico	27.2174	-112.214		1	1							1	1				1						M
2018	Pinon-Colin et al	Microplastics on sandy beaches of the Baja California Peninsula, Mexico	2018	Loreto, Mexico	26.0069	-111.339		1	1							1					1						M
2018	Pinon-Colin et al	Microplastics on sandy beaches of the Baja California Peninsula, Mexico	2018	El Requeson Mulege, Mexico	26.6384	-111.831		1	1							1	1				1						M
2018	Pinon-Colin et al	Microplastics on sandy beaches of the Baja California Peninsula, Mexico	2018	La Paz, Mexico	24.1636	-110.317		1	1							1	1				1						M
2018	Pinon-Colin et al	Microplastics on sandy beaches of the Baja California Peninsula, Mexico	2018	La Balandra, Mexico	24.3218	-110.324		1	1							1	1				1						M
2015	Song et al	A comparison of micrscopic and spectroscopic identification methods for analysis of microplastics in environmental samples	2015	Jinwoodo, Geoje Island, Korea	35.0631	128.877		1	1							1					1						M
2015	Song et al	A comparison of micrscopic and spectroscopic identification methods for analysis of microplastics in environmental samples	2015	Guyoung, Geoje Island, Korea	35.0302	128.697		1	1							1					1						M
2015	Song et al	A comparison of micrscopic and spectroscopic identification methods for analysis of microplastics in environmental samples	2015	Heungnam, Geoje Island, Korea	34.9673	128.708		1	1							1					1						M
2015	Song et al	A comparison of micrscopic and spectroscopic identification methods for analysis of microplastics in environmental samples	2015	Deokpo, Geoje Island, Korea	34.8917	128.703		1	1							1					1						M
2015	Song et al	A comparison of micrscopic and spectroscopic identification methods for analysis of microplastics in environmental samples	2015	Wahyun, Geoje Island, Korea	34.8068	128.697		1	1							1					1						M
2015	Song et al	A comparison of micrscopic and spectroscopic identification methods for analysis of microplastics in environmental samples	2015	Myoungsa, Geoje Island, Korea	34.726	128.603		1	1							1					1						M
2017	Cannas et al	Plastic litter in sediments from the coasts of south Tuscany	2017	Albegna River, Italy	42.4887	11.1931		1	1												1						M
2017	Cannas et al	Plastic litter in sediments from the coasts of south Tuscany	2017	Capalbio and Fiora River area, Italy	42.4004	11.3645		1	1												1						M
2015	Cluzard et al	Intertidal concentrations of microplastics and their influence on ammonium cycling as related to the shellfish industry	2015	Bayne's Sounds, British Columbia, Canada	49.63	-124.915		1	1									1			1					1	M
2015	Cluzard et al	Intertidal concentrations of microplastics and their influence on ammonium cycling as related to the shellfish industry	2015	Bayne's Sounds, British Columbia, Canada	49.6093	-124.899		1	1									1			1					1	M
2015	Cluzard et al	Intertidal concentrations of microplastics and their influence on ammonium cycling as related to the shellfish industry	2015	Bayne's Sounds, British Columbia, Canada	49.5262	-124.849		1	1									1			1					1	M
2015	Cluzard et al	Intertidal concentrations of microplastics and their influence on ammonium cycling as related to the shellfish industry	2015	Bayne's Sounds, British Columbia, Canada	49.5078	-124.827		1	1									1			1					1	M
2015	Cluzard et al	Intertidal concentrations of microplastics and their influence on ammonium cycling as related to the shellfish industry	2015	Bayne's Sounds, British Columbia, Canada	49.4581	-124.75		1	1									1			1					1	M
2015	Cluzard et al	Intertidal concentrations of microplastics and their influence on ammonium cycling as related to the shellfish industry	2015	Bayne's Sounds, British Columbia, Canada	49.4755	-124.695		1	1									1			1					1	M
2015	Cluzard et al	Intertidal concentrations of microplastics and their influence on ammonium cycling as related to the shellfish industry	2015	Bayne's Sounds, British Columbia, Canada	49.4878	-124.753		1	1									1			1					1	M
2015	Cluzard et al	Intertidal concentrations of microplastics and their influence on ammonium cycling as related to the shellfish industry	2015	Bayne's Sounds, British Columbia, Canada	49.5031	-124.769		1	1									1			1					1	M
2015	Cluzard et al	Intertidal concentrations of microplastics and their influence on ammonium cycling as related to the shellfish industry	2015	Bayne's Sounds, British Columbia, Canada	49.5341	-124.821		1	1									1			1					1	M
2015	Cluzard et al	Intertidal concentrations of microplastics and their influence on ammonium cycling as related to the shellfish industry	2015	Bayne's Sounds, British Columbia, Canada	49.5574	-124.844		1	1									1			1					1	M
2015	Cluzard et al	Intertidal concentrations of microplastics and their influence on ammonium cycling as related to the shellfish industry	2015	Bayne's Sounds, British Columbia, Canada	49.5848	-124.84		1	1									1			1					1	M
2015	Cluzard et al	Intertidal concentrations of microplastics and their influence on ammonium cycling as related to the shellfish industry	2015	Bayne's Sounds, British Columbia, Canada	49.6228	-124.855		1	1									1			1					1	M
2015	Cluzard et al	Intertidal concentrations of microplastics and their influence on ammonium cycling as related to the shellfish industry	2015	Bayne's Sounds, British Columbia, Canada	49.5771	-124.788		1	1									1			1					1	M
2015	Cluzard et al	Intertidal concentrations of microplastics and their influence on ammonium cycling as related to the shellfish industry	2015	Bayne's Sounds, British Columbia, Canada	49.5393	-124.755		1	1									1			1					1	M
2019	Wu et al	Occurrence and distribution of microplastics in the surface water and sediment of two typical estuaries in Bohai Bay, China	2019	Bohai Bay, China	38.9583	117.713		1	1									1			1					1	M
2019	Wu et al	Occurrence and distribution of microplastics in the surface water and sediment of two typical estuaries in Bohai Bay, China	2019	Bohai Bay, China	38.9776	117.715		1	1									1			1					1	M
2019	Wu et al	Occurrence and distribution of microplastics in the surface water and sediment of two typical estuaries in Bohai Bay, China	2019	Bohai Bay, China	38.9663	117.731		1	1									1			1					1	M
2019	Wu et al	Occurrence and distribution of microplastics in the surface water and sediment of two typical estuaries in Bohai Bay, China	2019	Bohai Bay, China	38.9541	117.776		1	1									1			1					1	M
2019	Wu et al	Occurrence and distribution of microplastics in the surface water and sediment of two typical estuaries in Bohai Bay, China	2019	Bohai Bay, China	38.9412	117.827		1	1									1			1					1	M
2019	Wu et al	Occurrence and distribution of microplastics in the surface water and sediment of two typical estuaries in Bohai Bay, China	2019	Bohai Bay, China	38.931	117.867		1	1									1			1					1	M
2019	Wu et al	Occurrence and distribution of microplastics in the surface water and sediment of two typical estuaries in Bohai Bay, China	2019	Bohai Bay, China	39.0726	117.763		1	1									1			1					1	M
2019	Wu et al	Occurrence and distribution of microplastics in the surface water and sediment of two typical estuaries in Bohai Bay, China	2019	Bohai Bay, China	39.0511	117.819		1	1									1			1					1	M
2019	Muller-Karanassos et al	Antifouling paint particles in the intertidal estuarine sediments from southwest England and their ingestion by the harbour ragworm, hediste diversicolor	2019	Hooe Lake, England	50.3561	-4.10739		1	1												1					1	M
2019	Muller-Karanassos et al	Antifouling paint particles in the intertidal estuarine sediments from southwest England and their ingestion by the harbour ragworm, hediste diversicolor	2019	University Marine Center, England	50.3659	-4.13016		1	1												1					1	M
2019	Muller-Karanassos et al	Antifouling paint particles in the intertidal estuarine sediments from southwest England and their ingestion by the harbour ragworm, hediste diversicolor	2019	Mount Batten, England	50.3589	-4.12603		1	1												1					1	M
2019	Muller-Karanassos et al	Antifouling paint particles in the intertidal estuarine sediments from southwest England and their ingestion by the harbour ragworm, hediste diversicolor	2019	Hooe Point, England	50.3592	-4.11365		1	1												1					1	M
2019	Muller-Karanassos et al	Antifouling paint particles in the intertidal estuarine sediments from southwest England and their ingestion by the harbour ragworm, hediste diversicolor	2019	Pomphlett Creek, England	50.3669	-4.1077		1	1												1					1	M
2019	Muller-Karanassos et al	Antifouling paint particles in the intertidal estuarine sediments from southwest England and their ingestion by the harbour ragworm, hediste diversicolor	2019	Plym Estuary, England	50.3658	-4.10878		1	1												1					1	M
2019	Muller-Karanassos et al	Antifouling paint particles in the intertidal estuarine sediments from southwest England and their ingestion by the harbour ragworm, hediste diversicolor	2019	Saltram Park, England	50.3785	-4.09938		1	1												1					1	M
2019	Muller-Karanassos et al	Antifouling paint particles in the intertidal estuarine sediments from southwest England and their ingestion by the harbour ragworm, hediste diversicolor	2019	Wornwell, England	50.3192	-3.93683		1	1												1					1	M
2019	Lo et al	Spatial distribution and source identification of hydrophobic organic compounds (HOCs) on sedimentary microplastic in Hong Kong	2019	Ha Pak Nai, Hong Kong	22.4353	113.948		1	1							1					1						M
2019	Lo et al	Spatial distribution and source identification of hydrophobic organic compounds (HOCs) on sedimentary microplastic in Hong Kong	2019	Lung Kwu Tan, Hong Kong	22.3902	113.92		1	1							1					1						M
2019	Lo et al	Spatial distribution and source identification of hydrophobic organic compounds (HOCs) on sedimentary microplastic in Hong Kong	2019	Tai Pai Tsui, Hong Kong	22.3432	114.06		1	1							1					1						M
2019	Lo et al	Spatial distribution and source identification of hydrophobic organic compounds (HOCs) on sedimentary microplastic in Hong Kong	2019	Sha Lo Wan, Hong Kong	22.2901	113.901		1	1							1					1						M
2019	Lo et al	Spatial distribution and source identification of hydrophobic organic compounds (HOCs) on sedimentary microplastic in Hong Kong	2019	Yi O, Hong Kong	22.2329	113.85		1	1							1					1						M
2019	Lo et al	Spatial distribution and source identification of hydrophobic organic compounds (HOCs) on sedimentary microplastic in Hong Kong	2019	Pak Sha Wan, Hong Kong	22.367	114.26		1	1							1					1						M
2019	Lo et al	Spatial distribution and source identification of hydrophobic organic compounds (HOCs) on sedimentary microplastic in Hong Kong	2019	Pak Lap Tsai, Hong Kong	22.3522	114.363		1	1							1					1						M
2019	Lo et al	Spatial distribution and source identification of hydrophobic organic compounds (HOCs) on sedimentary microplastic in Hong Kong	2019	Tung Lung Chau, Hong Kong	22.2567	114.293		1	1							1					1						M
2019	Lo et al	Spatial distribution and source identification of hydrophobic organic compounds (HOCs) on sedimentary microplastic in Hong Kong	2019	Stanley, Hong Kong	22.2177	114.211		1	1							1					1						M
2019	Lo et al	Spatial distribution and source identification of hydrophobic organic compounds (HOCs) on sedimentary microplastic in Hong Kong	2019	Po Toi Island, Hong Kong	22.1649	114.254		1	1							1					1						M
2019	Battisti et al	Fishing lines and fish hooks as neglected marine litter: first data on chemical composition, densities, and biological entrapment from a Mediterranean beach	2019	Italy, Cerveteri and Ladispoli municipalities	41.9667	12.05	1					1		1			1				1						M
2015	Davis and Murphy	Plastic in surface waters of the Inside Passage and beaches of the Salish Sea in Washington State	2015	Adelma Beach, Washington, USA	48.0517	-122.84		1		1	0.5			1		1		1			1						M
2015	Davis and Murphy	Plastic in surface waters of the Inside Passage and beaches of the Salish Sea in Washington State	2015	Bowman Bay, Washington, USA	48.4183	-122.653		1		1	0.5			1		1		1			1						M
2015	Davis and Murphy	Plastic in surface waters of the Inside Passage and beaches of the Salish Sea in Washington State	2015	Cabana Beach, Washington, USA	48.4917	-122.688		1		1	0.5			1		1		1			1						M
2015	Davis and Murphy	Plastic in surface waters of the Inside Passage and beaches of the Salish Sea in Washington State	2015	Clayton Beach, Washington, USA	48.64	-122.482		1		1	0.5			1		1		1			1						M
2015	Davis and Murphy	Plastic in surface waters of the Inside Passage and beaches of the Salish Sea in Washington State	2015	Double Bluff, Washington, USA	47.98	-122.515		1		1	0.5			1		1		1			1						M
2015	Davis and Murphy	Plastic in surface waters of the Inside Passage and beaches of the Salish Sea in Washington State	2015	Dungeness Spit, Washington, USA	48.1517	-123.182		1		1	0.5			1		1		1			1						M
2015	Davis and Murphy	Plastic in surface waters of the Inside Passage and beaches of the Salish Sea in Washington State	2015	Fay Bainbridge State Park, Washington, USA	47.705	-122.507		1		1	0.5			1		1		1			1						M
2015	Davis and Murphy	Plastic in surface waters of the Inside Passage and beaches of the Salish Sea in Washington State	2015	Fort Casey, Washington, USA	48.1583	-122.682		1		1	0.5			1		1		1			1						M
2015	Davis and Murphy	Plastic in surface waters of the Inside Passage and beaches of the Salish Sea in Washington State	2015	Fort Worden, Washington, USA	48.1367	-122.762		1		1	0.5			1		1		1			1						M
2015	Davis and Murphy	Plastic in surface waters of the Inside Passage and beaches of the Salish Sea in Washington State	2015	Gooseberry Point, Washington, USA	48.7317	-122.668		1		1	0.5			1		1		1			1						M
2015	Davis and Murphy	Plastic in surface waters of the Inside Passage and beaches of the Salish Sea in Washington State	2015	Hollywood Beach, Washington, USA	48.12	-123.43		1		1	0.5			1		1		1			1						M
2015	Davis and Murphy	Plastic in surface waters of the Inside Passage and beaches of the Salish Sea in Washington State	2015	Howarth Park, Washington, USA	47.9633	-122.242		1		1	0.5			1		1		1			1						M
2015	Davis and Murphy	Plastic in surface waters of the Inside Passage and beaches of the Salish Sea in Washington State	2015	Mukilteo Lighthouse State Park, Washington, USA	47.9467	-122.308		1		1	0.5			1		1		1			1						M
2015	Davis and Murphy	Plastic in surface waters of the Inside Passage and beaches of the Salish Sea in Washington State	2015	Belfair State Park, Washington, USA	47.43	-122.875		1		1	0.5			1		1		1			1						M
2015	Davis and Murphy	Plastic in surface waters of the Inside Passage and beaches of the Salish Sea in Washington State	2015	Crescent Beach, Washington, USA	48.695	-122.897		1		1	0.5			1		1		1			1						M
2015	Davis and Murphy	Plastic in surface waters of the Inside Passage and beaches of the Salish Sea in Washington State	2015	Discovery Park, Washington, USA	47.66	-122.433		1		1	0.5			1		1		1			1						M
2015	Davis and Murphy	Plastic in surface waters of the Inside Passage and beaches of the Salish Sea in Washington State	2015	Fort Flagler, Washington, USA	48.0983	-122.69		1		1	0.5			1		1		1			1						M
2015	Davis and Murphy	Plastic in surface waters of the Inside Passage and beaches of the Salish Sea in Washington State	2015	Indian Island Beach, Washington, USA	48.695	-122.908		1		1	0.5			1		1		1			1						M
2015	Davis and Murphy	Plastic in surface waters of the Inside Passage and beaches of the Salish Sea in Washington State	2015	Jack Hyde Beach, Washington, USA	47.275	-122.463		1		1				1		1		1			1						M
2015	Davis and Murphy	Plastic in surface waters of the Inside Passage and beaches of the Salish Sea in Washington State	2015	Jackson's Beach, Washington, USA	48.5183	-122.695		1	1							1		1			1						M
2015	Davis and Murphy	Plastic in surface waters of the Inside Passage and beaches of the Salish Sea in Washington State	2015	Jetty Island, Washington, USA	48.0033	-122.23		1		1				1		1		1			1						M
2015	Davis and Murphy	Plastic in surface waters of the Inside Passage and beaches of the Salish Sea in Washington State	2015	Johnson Point, Washington, USA	47.1683	-122.825		1		1	0.5			1		1		1			1						M
2015	Davis and Murphy	Plastic in surface waters of the Inside Passage and beaches of the Salish Sea in Washington State	2015	Kayak Point, Washington, USA	48.135	-122.368		1		1	0.5			1		1		1			1						M
2015	Davis and Murphy	Plastic in surface waters of the Inside Passage and beaches of the Salish Sea in Washington State	2015	Lincoln Park, Washington, USA	47.5267	-122.395		1		1	0.5			1		1		1			1						M
2015	Davis and Murphy	Plastic in surface waters of the Inside Passage and beaches of the Salish Sea in Washington State	2015	Odlin Park, Washington, USA	48.5567	-122.892		1	1							1		1			1						M
2015	Davis and Murphy	Plastic in surface waters of the Inside Passage and beaches of the Salish Sea in Washington State	2015	Owen's Beach, Washington, USA	47.3133	-122.53		1		1				1		1		1			1						M
2015	Davis and Murphy	Plastic in surface waters of the Inside Passage and beaches of the Salish Sea in Washington State	2015	Point No Point, Washington, USA	47.9117	-122.528		1		1	0.5			1		1		1			1						M
2015	Davis and Murphy	Plastic in surface waters of the Inside Passage and beaches of the Salish Sea in Washington State	2015	Potlatch State Park, Washington, USA	47.3617	-123.157		1			0.5			1		1		1			1						M
2015	Davis and Murphy	Plastic in surface waters of the Inside Passage and beaches of the Salish Sea in Washington State	2015	Protection Island, Washington, USA	48.1267	-122.913		1		1	0.5			1		1		1			1						M
2015	Davis and Murphy	Plastic in surface waters of the Inside Passage and beaches of the Salish Sea in Washington State	2015	Richmond Beach, Washington, USA	47.7633	-122.387		1	1							1		1			1						M
2015	Davis and Murphy	Plastic in surface waters of the Inside Passage and beaches of the Salish Sea in Washington State	2015	Rotary Park, Washington, USA	48.5133	-122.602		1	1							1		1			1						M
2015	Davis and Murphy	Plastic in surface waters of the Inside Passage and beaches of the Salish Sea in Washington State	2015	Salt Creek, Washington, USA	48.1617	-123.707		1		1	0.5			1		1		1			1						M
2015	Davis and Murphy	Plastic in surface waters of the Inside Passage and beaches of the Salish Sea in Washington State	2015	Silverdale Waterfront Park, Washington, USA	47.6433	-122.695		1		1	0.5			1		1		1			1						M
2015	Davis and Murphy	Plastic in surface waters of the Inside Passage and beaches of the Salish Sea in Washington State	2015	South Beach, Washington, USA	48.4567	-123.002		1		1				1		1		1			1						M
2015	Davis and Murphy	Plastic in surface waters of the Inside Passage and beaches of the Salish Sea in Washington State	2015	Tawana State Park, Washington, USA	47.3783	-122.972		1		1				1		1		1			1						M
2015	Davis and Murphy	Plastic in surface waters of the Inside Passage and beaches of the Salish Sea in Washington State	2015	Tolmie State Park, Washington, USA	47.1217	-122.777		1			0.5			1		1		1			1						M
2015	Davis and Murphy	Plastic in surface waters of the Inside Passage and beaches of the Salish Sea in Washington State	2015	Walker County Park, Washington, USA	47.2017	-123.062		1			0.5			1		1		1			1						M
2019	Alvarez-Hernandez et al	Microplastic debris in beaches of Tenerife (Canary Island, Spain)	2019	El Socorro (Los Realejos), Canary Islands	28.394	-16.6032		1	1							1		1			1					1	M
2019	Alvarez-Hernandez et al	Microplastic debris in beaches of Tenerife (Canary Island, Spain)	2019	San Marcos (Icod de los Vinos), Canary Islands	28.3781	-16.7237		1	1									1			1					1	M
2019	Alvarez-Hernandez et al	Microplastic debris in beaches of Tenerife (Canary Island, Spain)	2019	Los Abriguitos (Arico), Canary Islands	28.1432	-16.4386		1	1									1			1					1	M
2019	Alvarez-Hernandez et al	Microplastic debris in beaches of Tenerife (Canary Island, Spain)	2019	Leocadio Machado (Granadilla de Abona), Canary Islands	28.0415	-16.5423		1	1									1			1					1	M
2019	Alvarez-Hernandez et al	Microplastic debris in beaches of Tenerife (Canary Island, Spain)	2019	El Poris (Arico), Canary Islands	28.1642	-16.4318		1	1									1			1					1	M
2019	Alvarez-Hernandez et al	Microplastic debris in beaches of Tenerife (Canary Island, Spain)	2019	Playa Grande (Arico), Canary Islands	28.1524	-16.4316		1	1									1			1					1	M
2019	Naji et al	Small microplastic particles (S-MPPs) in sediments of mangrove ecosystem on the northern coast of the Persian Gulf	2019	Bandar Lengeh, Iran	26.5414	54.8903		1	1												1						M
2019	Naji et al	Small microplastic particles (S-MPPs) in sediments of mangrove ecosystem on the northern coast of the Persian Gulf	2019	Lashtaghan, Iran	26.9415	55.5933		1	1												1						M
2019	Naji et al	Small microplastic particles (S-MPPs) in sediments of mangrove ecosystem on the northern coast of the Persian Gulf	2019	Mardoo, Iran	26.9849	55.661		1	1												1						M
2019	Naji et al	Small microplastic particles (S-MPPs) in sediments of mangrove ecosystem on the northern coast of the Persian Gulf	2019	Bandar Gelkan, Iran	26.9808	55.7078		1	1												1						M
2019	Naji et al	Small microplastic particles (S-MPPs) in sediments of mangrove ecosystem on the northern coast of the Persian Gulf	2019	Bandar Angur, Iran	27.0008	55.8186		1	1												1						M
2019	Nachite et al	Spatial and temporal variations of litter at the Mediterranean beaches of Morocco mainly due to beach users	2019	Tangier - Municipal Beach, Morocco	35.7791	-5.7982	1				1			1		1	1				1						M
2019	Nachite et al	Spatial and temporal variations of litter at the Mediterranean beaches of Morocco mainly due to beach users	2019	Tangier-Sanea Beach, Morocco	35.7763	-5.78852	1				1			1		1	1				1						M
2019	Nachite et al	Spatial and temporal variations of litter at the Mediterranean beaches of Morocco mainly due to beach users	2019	Marina Smir, Morocco	35.7507	-5.34222	1				1			1		1	1				1						M
2019	Nachite et al	Spatial and temporal variations of litter at the Mediterranean beaches of Morocco mainly due to beach users	2019	Martil-Oued Maleh, Morocco	35.6369	-5.27636	1				1			1		1	1				1						M
2019	Nachite et al	Spatial and temporal variations of litter at the Mediterranean beaches of Morocco mainly due to beach users	2019	Martil-City Beach, Morocco	35.6216	-5.27113	1				1			1		1	1				1						M
2019	Nachite et al	Spatial and temporal variations of litter at the Mediterranean beaches of Morocco mainly due to beach users	2019	Oued Laou, Morocco	35.4585	-5.09542	1				1			1		1	1				1						M
2019	Nachite et al	Spatial and temporal variations of litter at the Mediterranean beaches of Morocco mainly due to beach users	2019	Kaa Asrasse, Morocco	35.412	-5.06639	1				1			1		1	1				1						M
2019	Nachite et al	Spatial and temporal variations of litter at the Mediterranean beaches of Morocco mainly due to beach users	2019	Jebha, Morocco	35.2043	-4.67866	1				1			1		1	1				1						M
2019	Nachite et al	Spatial and temporal variations of litter at the Mediterranean beaches of Morocco mainly due to beach users	2019	Quemado, Morocco	35.2437	-3.92656	1				1			1		1	1				1						M
2019	Nachite et al	Spatial and temporal variations of litter at the Mediterranean beaches of Morocco mainly due to beach users	2019	Sfiha, Morocco	35.2122	-3.90206	1				1			1		1	1				1						M
2019	Nachite et al	Spatial and temporal variations of litter at the Mediterranean beaches of Morocco mainly due to beach users	2019	Nador-Boqueronesa Beach, Morocco	35.2586	-2.91739	1				1			1		1	1				1						M
2019	Nachite et al	Spatial and temporal variations of litter at the Mediterranean beaches of Morocco mainly due to beach users	2019	Nador-Kariat Arekmane Beach, Morocco	35.1136	-2.71688	1				1			1		1	1				1						M
2019	Nachite et al	Spatial and temporal variations of litter at the Mediterranean beaches of Morocco mainly due to beach users	2019	Saidia-Marina Beach, Morocco	35.1139	-2.30259	1				1			1		1	1				1						M
2019	Nachite et al	Spatial and temporal variations of litter at the Mediterranean beaches of Morocco mainly due to beach users	2019	Saidia-City Beach, Morocco	35.0855	-2.21677	1				1			1		1	1				1						M
2019	Ghaffari et al	The influence of human activity and morphological characteristics of beaches on plastic debris distribution along the Caspian Sea as a closed water body	2019	Chaboksar, Iran	36.984	50.5678		1	1							1	1		1		1	1					M (S)
2019	Ghaffari et al	The influence of human activity and morphological characteristics of beaches on plastic debris distribution along the Caspian Sea as a closed water body	2019	Chamkhaleh, Iran	37.2303	50.2643		1	1							1	1		1		1						M (S)
2019	Ghaffari et al	The influence of human activity and morphological characteristics of beaches on plastic debris distribution along the Caspian Sea as a closed water body	2019	Boujagh National Park, Iran	37.4606	49.8931		1	1							1	1		1		1						M (S)
2019	Ghaffari et al	The influence of human activity and morphological characteristics of beaches on plastic debris distribution along the Caspian Sea as a closed water body	2019	Ghoo, Iran	37.4848	49.435		1	1							1	1		1		1						M (S)
2019	Ghaffari et al	The influence of human activity and morphological characteristics of beaches on plastic debris distribution along the Caspian Sea as a closed water body	2019	Eskeleh, Iran	37.5422	49.2575		1	1							1	1		1		1						M (S)
2019	Ghaffari et al	The influence of human activity and morphological characteristics of beaches on plastic debris distribution along the Caspian Sea as a closed water body	2019	Rezvanshahr, Iran	37.5844	49.177		1	1							1	1		1		1						M (S)
2019	Ghaffari et al	The influence of human activity and morphological characteristics of beaches on plastic debris distribution along the Caspian Sea as a closed water body	2019	Talesh, Iran	37.8022	48.9753		1	1							1	1		1		1						M (S)
2019	Ghaffari et al	The influence of human activity and morphological characteristics of beaches on plastic debris distribution along the Caspian Sea as a closed water body	2019	Astara, Iran	38.4192	48.881		1	1							1	1		1		1						M (S)
2018	de Francesco et al	Beach litter in Mediterranean coastal dunes: an insight on the Adriatic coast (central Italy)	2018	Punta Aderci-Punta della Penna, Italy	42.1736	14.7033	1		1							1	1				1						M
2018	de Francesco et al	Beach litter in Mediterranean coastal dunes: an insight on the Adriatic coast (central Italy)	2018	Foce Trigno-Marina di Petacciato, Italy	42.0382	14.8489	1		1							1	1				1						M
2018	de Francesco et al	Beach litter in Mediterranean coastal dunes: an insight on the Adriatic coast (central Italy)	2018	Foce Saccione-Bonifica Ramitelli, Italy	41.9317	15.1113	1		1							1	1				1						M
2018	Maziane et al	Artificial polymer materials debris characteristics along the Moroccan Mediterranean coast	2018	Tangier - Municipal Beach, Morocco	35.7791	-5.7982	1		1							1					1						M (S)
2018	Maziane et al	Artificial polymer materials debris characteristics along the Moroccan Mediterranean coast	2018	Tangier - Sanea Beach, Morocco	35.7763	-5.78852	1		1							1					1						M (S)
2018	Maziane et al	Artificial polymer materials debris characteristics along the Moroccan Mediterranean coast	2018	Marina Smir, Morocco	35.7507	-5.34222	1		1							1					1						M (S)
2018	Maziane et al	Artificial polymer materials debris characteristics along the Moroccan Mediterranean coast	2018	Martil - Oued Maleh, Morocco	35.6369	-5.27636	1		1							1					1						M (S)
2018	Maziane et al	Artificial polymer materials debris characteristics along the Moroccan Mediterranean coast	2018	Martil - City Beach, Morocco	35.6216	-5.27113	1		1							1					1						M (S)
2018	Maziane et al	Artificial polymer materials debris characteristics along the Moroccan Mediterranean coast	2018	Oued Laou, Morocco	35.4585	-5.09542	1		1							1					1						M (S)
2018	Maziane et al	Artificial polymer materials debris characteristics along the Moroccan Mediterranean coast	2018	Kaa Asrasse, Morocco	35.412	-5.06639	1		1							1					1						M (S)
2018	Maziane et al	Artificial polymer materials debris characteristics along the Moroccan Mediterranean coast	2018	Jebha, Morocco	35.2043	-4.67866	1		1							1					1						M (S)
2018	Maziane et al	Artificial polymer materials debris characteristics along the Moroccan Mediterranean coast	2018	Quemado, Morocco	35.2437	-3.92656	1		1							1					1						M (S)
2018	Maziane et al	Artificial polymer materials debris characteristics along the Moroccan Mediterranean coast	2018	Sfiha, Morocco	35.2122	-3.90206	1		1							1					1						M (S)
2018	Maziane et al	Artificial polymer materials debris characteristics along the Moroccan Mediterranean coast	2018	Nador - Boqueronesa Beach, Morocco	35.2586	-2.91739	1		1							1					1						M (S)
2018	Maziane et al	Artificial polymer materials debris characteristics along the Moroccan Mediterranean coast	2018	Nador - Kariat Arekmane Beach, Morocco	35.1136	-2.71688	1		1							1					1						M (S)
2018	Maziane et al	Artificial polymer materials debris characteristics along the Moroccan Mediterranean coast	2018	Saidia - Marina Beach, Morocco	35.1139	-2.30259	1		1							1					1						M (S)
2018	Maziane et al	Artificial polymer materials debris characteristics along the Moroccan Mediterranean coast	2018	Saidia - City Beach, Morocco	35.0855	-2.21677	1		1							1					1						M (S)
2017	Pietrelli et al	Characterization of plastic beach debris finalized to its removal: a proposal for a recycling scheme	2017	Cerveteri and Ladispoli, Italy	41.9667	12.05		1	1												1						M
2017	Siciu et al	Evaluation of environmental quality of sandy beaches in southeastern Brazil	2017	Praia Grande Beach, Arraial do Cabo, Brazil	-22.969	-42.0346	1				1			1							1						M
2017	Siciu et al	Evaluation of environmental quality of sandy beaches in southeastern Brazil	2017	Grussai Beach Arraial do Cabo, Brazil	-21.6994	-41.0239	1				1			1							1						M
2017	Krelling et al	Transboundary movement of marine litter in an estuarine gradient: Evaluating sources and sinks using hydrodynamic modelling and ground truthing estimates	2017	Piacaguera, Paranagua, Brazil	-25.4791	-48.4864	1		1							1					1						M (E)
2017	Krelling et al	Transboundary movement of marine litter in an estuarine gradient: Evaluating sources and sinks using hydrodynamic modelling and ground truthing estimates	2017	Rasa da Cotinga, Paranagua, Brazil	-25.5115	-48.4543	1		1							1					1						M (E)
2017	Krelling et al	Transboundary movement of marine litter in an estuarine gradient: Evaluating sources and sinks using hydrodynamic modelling and ground truthing estimates	2017	Canto das Pedras, Pontal do Parana, Brazil	-25.5661	-48.3539	1		1							1					1						M
2017	Krelling et al	Transboundary movement of marine litter in an estuarine gradient: Evaluating sources and sinks using hydrodynamic modelling and ground truthing estimates	2017	Assenodi, Pontal do Parana, Brazil	-25.5897	-48.3679	1		1							1					1						M
2017	Krelling et al	Transboundary movement of marine litter in an estuarine gradient: Evaluating sources and sinks using hydrodynamic modelling and ground truthing estimates	2017	Barrancos, Brazil	-25.6196	-48.4107	1		1							1					1						M
2017	Krelling et al	Transboundary movement of marine litter in an estuarine gradient: Evaluating sources and sinks using hydrodynamic modelling and ground truthing estimates	2017	Guape, Brazil	-25.6329	-48.4238	1		1							1					1						M
2017	Botero et al	Litter Assessment on 99 Cuban beaches: A baseline to identify sources of pollution and impacts for tourism and recreation	2017	Allende, Cuba	23.039	-81.5387	1		1												1						M
2017	Botero et al	Litter Assessment on 99 Cuban beaches: A baseline to identify sources of pollution and impacts for tourism and recreation	2017	Ancon, Cuba	21.7363	-80.0052	1		1												1						M
2017	Botero et al	Litter Assessment on 99 Cuban beaches: A baseline to identify sources of pollution and impacts for tourism and recreation	2017	Arenas Blancas, Cuba	23.1559	-81.2498	1		1												1						M
2017	Botero et al	Litter Assessment on 99 Cuban beaches: A baseline to identify sources of pollution and impacts for tourism and recreation	2017	Arroyo Verbejo, Cuba	23.1501	-81.8261	1		1												1						M
2017	Botero et al	Litter Assessment on 99 Cuban beaches: A baseline to identify sources of pollution and impacts for tourism and recreation	2017	Baconao, Cuba	19.9018	-75.4484	1		1												1						M
2017	Botero et al	Litter Assessment on 99 Cuban beaches: A baseline to identify sources of pollution and impacts for tourism and recreation	2017	Barlovento, Cuba	23.1181	-81.364	1		1												1						M
2017	Botero et al	Litter Assessment on 99 Cuban beaches: A baseline to identify sources of pollution and impacts for tourism and recreation	2017	Bocaciega, Cuba	23.1772	-82.1902	1		1												1						M
2017	Botero et al	Litter Assessment on 99 Cuban beaches: A baseline to identify sources of pollution and impacts for tourism and recreation	2017	Brisas, Cuba	23.1862	-81.186	1		1												1						M
2017	Botero et al	Litter Assessment on 99 Cuban beaches: A baseline to identify sources of pollution and impacts for tourism and recreation	2017	Buenaventura, Cuba	22.2792	-81.2146	1		1												1						M
2017	Botero et al	Litter Assessment on 99 Cuban beaches: A baseline to identify sources of pollution and impacts for tourism and recreation	2017	Bueycabon, Cuba	19.9612	-75.9582	1		1												1						M
2017	Botero et al	Litter Assessment on 99 Cuban beaches: A baseline to identify sources of pollution and impacts for tourism and recreation	2017	Bueyvaca, Cuba	23.0437	-81.5137	1		1												1						M
2017	Botero et al	Litter Assessment on 99 Cuban beaches: A baseline to identify sources of pollution and impacts for tourism and recreation	2017	Cabo Cruz, Cuba	19.8394	-77.722	1		1												1						M
2017	Botero et al	Litter Assessment on 99 Cuban beaches: A baseline to identify sources of pollution and impacts for tourism and recreation	2017	Cajobabo, Cuba	20.0691	-74.4879	1		1												1						M
2017	Botero et al	Litter Assessment on 99 Cuban beaches: A baseline to identify sources of pollution and impacts for tourism and recreation	2017	Cajuajo, Cuba	20.2986	-74.3872	1		1												1						M
2017	Botero et al	Litter Assessment on 99 Cuban beaches: A baseline to identify sources of pollution and impacts for tourism and recreation	2017	Caleton Blanco, Cuba	19.9621	-75.9944	1		1												1						M
2017	Botero et al	Litter Assessment on 99 Cuban beaches: A baseline to identify sources of pollution and impacts for tourism and recreation	2017	Calle 46, Cuba	23.1517	-81.2603	1		1												1						M
2017	Botero et al	Litter Assessment on 99 Cuban beaches: A baseline to identify sources of pollution and impacts for tourism and recreation	2017	Calle 48-50, Cuba	23.1522	-81.2587	1		1												1						M
2017	Botero et al	Litter Assessment on 99 Cuban beaches: A baseline to identify sources of pollution and impacts for tourism and recreation	2017	Calle 55, Cuba	23.1533	-81.2551	1		1												1						M
2017	Botero et al	Litter Assessment on 99 Cuban beaches: A baseline to identify sources of pollution and impacts for tourism and recreation	2017	Calle 57 Museo, Cuba	23.1545	-81.2524	1		1												1						M
2017	Botero et al	Litter Assessment on 99 Cuban beaches: A baseline to identify sources of pollution and impacts for tourism and recreation	2017	Campamento, Cuba	22.2709	-81.177	1		1												1						M
2017	Botero et al	Litter Assessment on 99 Cuban beaches: A baseline to identify sources of pollution and impacts for tourism and recreation	2017	Campismo Uva Calita, Cuba	22.525	-78.4902	1		1												1						M
2017	Botero et al	Litter Assessment on 99 Cuban beaches: A baseline to identify sources of pollution and impacts for tourism and recreation	2017	Canal E, Cuba	23.1328	-81.3101	1		1												1						M
2017	Botero et al	Litter Assessment on 99 Cuban beaches: A baseline to identify sources of pollution and impacts for tourism and recreation	2017	Canal W, Cuba	23.1322	-81.3126	1		1												1						M
2017	Botero et al	Litter Assessment on 99 Cuban beaches: A baseline to identify sources of pollution and impacts for tourism and recreation	2017	Cayo Levisa, Cuba	22.8852	-83.5328	1		1												1						M
2017	Botero et al	Litter Assessment on 99 Cuban beaches: A baseline to identify sources of pollution and impacts for tourism and recreation	2017	Cazonal, Cuba	19.8881	-75.474	1		1												1						M
2017	Botero et al	Litter Assessment on 99 Cuban beaches: A baseline to identify sources of pollution and impacts for tourism and recreation	2017	Chivirico, Cuba	19.9691	-76.407	1		1												1						M
2017	Botero et al	Litter Assessment on 99 Cuban beaches: A baseline to identify sources of pollution and impacts for tourism and recreation	2017	Corinthia, Cuba	20.7406	-75.4623	1		1												1						M
2017	Botero et al	Litter Assessment on 99 Cuban beaches: A baseline to identify sources of pollution and impacts for tourism and recreation	2017	Don Lino, Cuba	21.0896	-75.9956	1		1												1						M
2017	Botero et al	Litter Assessment on 99 Cuban beaches: A baseline to identify sources of pollution and impacts for tourism and recreation	2017	Duaba, Cuba	20.3774	-74.5211	1		1												1						M
2017	Botero et al	Litter Assessment on 99 Cuban beaches: A baseline to identify sources of pollution and impacts for tourism and recreation	2017	El Frances, Cuba	19.9952	-76.2269	1		1												1						M
2017	Botero et al	Litter Assessment on 99 Cuban beaches: A baseline to identify sources of pollution and impacts for tourism and recreation	2017	El Mamey, Cuba	23.0507	-81.4952	1		1												1						M
2017	Botero et al	Litter Assessment on 99 Cuban beaches: A baseline to identify sources of pollution and impacts for tourism and recreation	2017	El Morrillo, Cuba	22.9426	-83.3111	1		1												1						M
2017	Botero et al	Litter Assessment on 99 Cuban beaches: A baseline to identify sources of pollution and impacts for tourism and recreation	2017	El Rio, Cuba	22.2795	-81.1861	1		1												1						M
2017	Botero et al	Litter Assessment on 99 Cuban beaches: A baseline to identify sources of pollution and impacts for tourism and recreation	2017	El Salto, Cuba	22.9952	-80.5349	1		1												1						M
2017	Botero et al	Litter Assessment on 99 Cuban beaches: A baseline to identify sources of pollution and impacts for tourism and recreation	2017	El Tenis, Cuba	23.0353	-81.558	1		1												1						M
2017	Botero et al	Litter Assessment on 99 Cuban beaches: A baseline to identify sources of pollution and impacts for tourism and recreation	2017	Faro Maya, Cuba	23.095	-81.4736	1		1												1						M
2017	Botero et al	Litter Assessment on 99 Cuban beaches: A baseline to identify sources of pollution and impacts for tourism and recreation	2017	Guanabo, Cuba	23.171	-82.1502	1		1												1						M
2017	Botero et al	Litter Assessment on 99 Cuban beaches: A baseline to identify sources of pollution and impacts for tourism and recreation	2017	Guardalavaca, Cuba	21.1266	-75.829	1		1												1						M
2017	Botero et al	Litter Assessment on 99 Cuban beaches: A baseline to identify sources of pollution and impacts for tourism and recreation	2017	H. Sol Cayo Coco, Cuba	22.539	-78.3615	1		1												1						M
2017	Botero et al	Litter Assessment on 99 Cuban beaches: A baseline to identify sources of pollution and impacts for tourism and recreation	2017	Hicacal, Cuba	19.964	-76.0396	1		1												1						M
2017	Botero et al	Litter Assessment on 99 Cuban beaches: A baseline to identify sources of pollution and impacts for tourism and recreation	2017	Iberostar C. S. Maria, Cuba	22.6644	-78.9958	1		1												1						M
2017	Botero et al	Litter Assessment on 99 Cuban beaches: A baseline to identify sources of pollution and impacts for tourism and recreation	2017	Imias, Cuba	20.0552	-74.6137	1		1												1						M
2017	Botero et al	Litter Assessment on 99 Cuban beaches: A baseline to identify sources of pollution and impacts for tourism and recreation	2017	Isabela, Cuba	22.9398	-80.0149	1		1												1						M
2017	Botero et al	Litter Assessment on 99 Cuban beaches: A baseline to identify sources of pollution and impacts for tourism and recreation	2017	Jibacoa, Cuba	23.1495	-81.8503	1		1												1						M
2017	Botero et al	Litter Assessment on 99 Cuban beaches: A baseline to identify sources of pollution and impacts for tourism and recreation	2017	Juan Vicente, Cuba	20.6969	-75.7274	1		1												1						M
2017	Botero et al	Litter Assessment on 99 Cuban beaches: A baseline to identify sources of pollution and impacts for tourism and recreation	2017	Juan Vicente, Cuba	20.6921	-75.7189	1		1												1						M
2017	Botero et al	Litter Assessment on 99 Cuban beaches: A baseline to identify sources of pollution and impacts for tourism and recreation	2017	Judio, Cuba	23.0409	-81.5696	1		1												1						M
2017	Botero et al	Litter Assessment on 99 Cuban beaches: A baseline to identify sources of pollution and impacts for tourism and recreation	2017	Juragua, Cuba	19.9397	-75.6724	1		1												1						M
2017	Botero et al	Litter Assessment on 99 Cuban beaches: A baseline to identify sources of pollution and impacts for tourism and recreation	2017	La Altura, Cuba	22.9572	-83.2979	1		1												1						M
2017	Botero et al	Litter Assessment on 99 Cuban beaches: A baseline to identify sources of pollution and impacts for tourism and recreation	2017	La Boca, Cuba	21.8008	-80.033	1		1												1						M
2017	Botero et al	Litter Assessment on 99 Cuban beaches: A baseline to identify sources of pollution and impacts for tourism and recreation	2017	La Estrella, Cuba	19.9698	-75.8679	1		1												1						M
2017	Botero et al	Litter Assessment on 99 Cuban beaches: A baseline to identify sources of pollution and impacts for tourism and recreation	2017	La Panchita, Cuba	22.9472	-80.4164	1		1												1						M
2017	Botero et al	Litter Assessment on 99 Cuban beaches: A baseline to identify sources of pollution and impacts for tourism and recreation	2017	La Punta, Cuba	22.5246	-79.443	1		1												1						M
2017	Botero et al	Litter Assessment on 99 Cuban beaches: A baseline to identify sources of pollution and impacts for tourism and recreation	2017	La Puntilla, Cuba	23.1483	-81.8537	1		1												1						M
2017	Botero et al	Litter Assessment on 99 Cuban beaches: A baseline to identify sources of pollution and impacts for tourism and recreation	2017	Las Americas (H. Melia), Cuba	23.1743	-81.2135	1		1												1						M
2017	Botero et al	Litter Assessment on 99 Cuban beaches: A baseline to identify sources of pollution and impacts for tourism and recreation	2017	Las Coloradas, Cuba	19.9831	-76.2815	1		1												1						M
2017	Botero et al	Litter Assessment on 99 Cuban beaches: A baseline to identify sources of pollution and impacts for tourism and recreation	2017	Las Coloradas, Cuba	19.9255	-77.6901	1		1												1						M
2017	Botero et al	Litter Assessment on 99 Cuban beaches: A baseline to identify sources of pollution and impacts for tourism and recreation	2017	Las Gaviotas, Cuba	22.6607	-79.0504	1		1												1						M
2017	Botero et al	Litter Assessment on 99 Cuban beaches: A baseline to identify sources of pollution and impacts for tourism and recreation	2017	Los Bajos, Cuba	21.1049	-76.0788	1		1												1						M
2017	Botero et al	Litter Assessment on 99 Cuban beaches: A baseline to identify sources of pollution and impacts for tourism and recreation	2017	Los Cocos, Cuba	23.1505	-81.8389	1		1												1						M
2017	Botero et al	Litter Assessment on 99 Cuban beaches: A baseline to identify sources of pollution and impacts for tourism and recreation	2017	Maguana, Cuba	20.485	-74.5995	1		1												1						M
2017	Botero et al	Litter Assessment on 99 Cuban beaches: A baseline to identify sources of pollution and impacts for tourism and recreation	2017	Mar Verde, Cuba	19.9658	-75.9405	1		1												1						M
2017	Botero et al	Litter Assessment on 99 Cuban beaches: A baseline to identify sources of pollution and impacts for tourism and recreation	2017	Media Luna, Cuba	20.1597	-77.4394	1		1												1						M
2017	Botero et al	Litter Assessment on 99 Cuban beaches: A baseline to identify sources of pollution and impacts for tourism and recreation	2017	Mejia, Cuba	20.7062	-75.1871	1		1												1						M
2017	Botero et al	Litter Assessment on 99 Cuban beaches: A baseline to identify sources of pollution and impacts for tourism and recreation	2017	Melia Cayo Guillermo, Cuba	22.5838	-78.6475	1		1												1						M
2017	Botero et al	Litter Assessment on 99 Cuban beaches: A baseline to identify sources of pollution and impacts for tourism and recreation	2017	Melia Cayo Santa Maria, Cuba	22.6616	-79.0583	1		1												1						M
2017	Botero et al	Litter Assessment on 99 Cuban beaches: A baseline to identify sources of pollution and impacts for tourism and recreation	2017	Morales, Cuba	20.91	-75.6265	1		1												1						M
2017	Botero et al	Litter Assessment on 99 Cuban beaches: A baseline to identify sources of pollution and impacts for tourism and recreation	2017	P.Bariguita, Cuba	20.3005	-74.2998	1		1												1						M
2017	Botero et al	Litter Assessment on 99 Cuban beaches: A baseline to identify sources of pollution and impacts for tourism and recreation	2017	Playa Banes, Cuba	23.0317	-82.6387	1		1												1						M
2017	Botero et al	Litter Assessment on 99 Cuban beaches: A baseline to identify sources of pollution and impacts for tourism and recreation	2017	Playa Blanca, Cuba	19.971	-76.3314	1		1												1						M
2017	Botero et al	Litter Assessment on 99 Cuban beaches: A baseline to identify sources of pollution and impacts for tourism and recreation	2017	Playa Blanca, Cuba	21.0847	-76.0067	1		1												1						M
2017	Botero et al	Litter Assessment on 99 Cuban beaches: A baseline to identify sources of pollution and impacts for tourism and recreation	2017	Playa Carenero, Cuba	22.9706	-83.159	1		1												1						M
2017	Botero et al	Litter Assessment on 99 Cuban beaches: A baseline to identify sources of pollution and impacts for tourism and recreation	2017	Playa del Puerco, Cuba	21.1123	-76.1041	1		1												1						M
2017	Botero et al	Litter Assessment on 99 Cuban beaches: A baseline to identify sources of pollution and impacts for tourism and recreation	2017	Playa Ingles, Cuba	21.8781	-80.2501	1		1												1						M
2017	Botero et al	Litter Assessment on 99 Cuban beaches: A baseline to identify sources of pollution and impacts for tourism and recreation	2017	Playa Larga, Cuba	22.2801	-81.2001	1		1												1						M
2017	Botero et al	Litter Assessment on 99 Cuban beaches: A baseline to identify sources of pollution and impacts for tourism and recreation	2017	Playa Larga, Cuba	22.5542	-78.4235	1		1												1						M
2017	Botero et al	Litter Assessment on 99 Cuban beaches: A baseline to identify sources of pollution and impacts for tourism and recreation	2017	Playa Majana, Cuba	22.6949	-82.7741	1		1												1						M
2017	Botero et al	Litter Assessment on 99 Cuban beaches: A baseline to identify sources of pollution and impacts for tourism and recreation	2017	Playa Mayabeque, Cuba	22.6742	-82.1475	1		1												1						M
2017	Botero et al	Litter Assessment on 99 Cuban beaches: A baseline to identify sources of pollution and impacts for tourism and recreation	2017	Playa Pesquero, Cuba	21.1012	-75.9338	1		1												1						M
2017	Botero et al	Litter Assessment on 99 Cuban beaches: A baseline to identify sources of pollution and impacts for tourism and recreation	2017	Playa Pilar, Cuba	22.613	-78.698	1		1												1						M
2017	Botero et al	Litter Assessment on 99 Cuban beaches: A baseline to identify sources of pollution and impacts for tourism and recreation	2017	Playa Piloto, Cuba	21.7835	-77.6787	1		1												1						M
2017	Botero et al	Litter Assessment on 99 Cuban beaches: A baseline to identify sources of pollution and impacts for tourism and recreation	2017	Playa Rosario, Cuba	22.6669	-82.0423	1		1												1						M
2017	Botero et al	Litter Assessment on 99 Cuban beaches: A baseline to identify sources of pollution and impacts for tourism and recreation	2017	Plaza America, Cuba	23.1754	-81.21	1		1												1						M
2017	Botero et al	Litter Assessment on 99 Cuban beaches: A baseline to identify sources of pollution and impacts for tourism and recreation	2017	Puerto Esperanza, Cuba	22.7745	-83.731	1		1												1						M
2017	Botero et al	Litter Assessment on 99 Cuban beaches: A baseline to identify sources of pollution and impacts for tourism and recreation	2017	Puerto Rico, Cuba	20.936	-75.6137	1		1												1						M
2017	Botero et al	Litter Assessment on 99 Cuban beaches: A baseline to identify sources of pollution and impacts for tourism and recreation	2017	Punta Periquillo, Cuba	22.6365	-79.1469	1		1												1						M
2017	Botero et al	Litter Assessment on 99 Cuban beaches: A baseline to identify sources of pollution and impacts for tourism and recreation	2017	S. Lucia La Boca, Cuba	21.6057	-77.0975	1		1												1						M
2017	Botero et al	Litter Assessment on 99 Cuban beaches: A baseline to identify sources of pollution and impacts for tourism and recreation	2017	S. Lucia La Concha, Cuba	21.5519	-77.035	1		1												1						M
2017	Botero et al	Litter Assessment on 99 Cuban beaches: A baseline to identify sources of pollution and impacts for tourism and recreation	2017	S. Lucia Natural, Cuba	21.5889	-77.0602	1		1												1						M
2017	Botero et al	Litter Assessment on 99 Cuban beaches: A baseline to identify sources of pollution and impacts for tourism and recreation	2017	S. Lucia Playa Coco, Cuba	21.6005	-77.1	1		1												1						M
2017	Botero et al	Litter Assessment on 99 Cuban beaches: A baseline to identify sources of pollution and impacts for tourism and recreation	2017	S. Lucia Tararaco, Cuba	21.5666	-77.0423	1		1												1						M
2017	Botero et al	Litter Assessment on 99 Cuban beaches: A baseline to identify sources of pollution and impacts for tourism and recreation	2017	Sandals, Cuba	23.1957	-81.1675	1		1												1						M
2017	Botero et al	Litter Assessment on 99 Cuban beaches: A baseline to identify sources of pollution and impacts for tourism and recreation	2017	Siboney, Cuba	19.9603	-75.704	1		1												1						M
2017	Botero et al	Litter Assessment on 99 Cuban beaches: A baseline to identify sources of pollution and impacts for tourism and recreation	2017	Sierra Mar, Cuba	19.9691	-76.3224	1		1												1						M
2017	Botero et al	Litter Assessment on 99 Cuban beaches: A baseline to identify sources of pollution and impacts for tourism and recreation	2017	Sigua, Cuba	19.8881	-75.5203	1		1												1						M
2017	Botero et al	Litter Assessment on 99 Cuban beaches: A baseline to identify sources of pollution and impacts for tourism and recreation	2017	Solymar, Cuba	23.1592	-81.2438	1		1												1						M
2017	Botero et al	Litter Assessment on 99 Cuban beaches: A baseline to identify sources of pollution and impacts for tourism and recreation	2017	Toa, Cuba	20.3902	-74.5277	1		1												1						M
2017	Botero et al	Litter Assessment on 99 Cuban beaches: A baseline to identify sources of pollution and impacts for tourism and recreation	2017	Verraco, Cuba	19.8947	-75.5768	1		1												1						M
2017	Botero et al	Litter Assessment on 99 Cuban beaches: A baseline to identify sources of pollution and impacts for tourism and recreation	2017	Yaguanabo, Cuba	21.8612	-80.2111	1		1												1						M
2016	Shernewski et. al	Beach macro-litter monitoring on southern Baltic beaches: results, experiences and recommendations	2016	Binz, Germany	54.41	13.603	1			1	1			1							1						M
2016	Shernewski et. al	Beach macro-litter monitoring on southern Baltic beaches: results, experiences and recommendations	2016	Boiensdorfer Weder, Germany	54.0274	11.5273	1			1				1							1						M
2016	Shernewski et. al	Beach macro-litter monitoring on southern Baltic beaches: results, experiences and recommendations	2016	Bug, Germany	54.584	13.205	1			1				1							1						M
2016	Shernewski et. al	Beach macro-litter monitoring on southern Baltic beaches: results, experiences and recommendations	2016	Darss Weststrand, Germany	54.4163	12.4632	1			1	0.75			1							1						M
2016	Shernewski et. al	Beach macro-litter monitoring on southern Baltic beaches: results, experiences and recommendations	2016	Fehmarn Gruner Brink, Germany	54.5171	11.1784	1			1				1							1						M
2016	Shernewski et. al	Beach macro-litter monitoring on southern Baltic beaches: results, experiences and recommendations	2016	Fehmarn Krummsteert, Germany	54.4356	11.0335	1			1	0.5			1							1						M
2016	Shernewski et. al	Beach macro-litter monitoring on southern Baltic beaches: results, experiences and recommendations	2016	Fehmarn Wallnau, Germany	54.4723	11.0193	1			1	0.5			1							1						M
2016	Shernewski et. al	Beach macro-litter monitoring on southern Baltic beaches: results, experiences and recommendations	2016	Glowe, Germany	54.5706	13.4656	1			1				1							1						M
2016	Shernewski et. al	Beach macro-litter monitoring on southern Baltic beaches: results, experiences and recommendations	2016	Gohren, Germany	54.3413	13.766	1			1	1			1							1						M
2016	Shernewski et. al	Beach macro-litter monitoring on southern Baltic beaches: results, experiences and recommendations	2016	Greifswalder Oie, Germany	54.2479	13.9186	1			1				1							1						M
2016	Shernewski et. al	Beach macro-litter monitoring on southern Baltic beaches: results, experiences and recommendations	2016	Hiddensee Gellen, Germany	54.487	13.0711	1			1				1							1						M
2016	Shernewski et. al	Beach macro-litter monitoring on southern Baltic beaches: results, experiences and recommendations	2016	Hiddensee Neubessin, Germany	54.5508	13.1057	1			1				1							1						M
2016	Shernewski et. al	Beach macro-litter monitoring on southern Baltic beaches: results, experiences and recommendations	2016	Hohe Dune, Germany	54.1796	12.099	1			1				1							1						M
2016	Shernewski et. al	Beach macro-litter monitoring on southern Baltic beaches: results, experiences and recommendations	2016	Kagsdorf, Germany	54.1438	11.6661	1				1	1		1							1						M
2016	Shernewski et. al	Beach macro-litter monitoring on southern Baltic beaches: results, experiences and recommendations	2016	Karkle, Lithuania	55.8084	21.0658	1			1	1			1							1						M
2016	Shernewski et. al	Beach macro-litter monitoring on southern Baltic beaches: results, experiences and recommendations	2016	Klaipeda, Lithuania	55.704	21.098	1			1	1			1							1						M
2016	Shernewski et. al	Beach macro-litter monitoring on southern Baltic beaches: results, experiences and recommendations	2016	Klein Zicker, Germany	54.2806	13.6923	1			1				1							1						M
2016	Shernewski et. al	Beach macro-litter monitoring on southern Baltic beaches: results, experiences and recommendations	2016	Lubmin, Germany	54.1381	13.6155	1			1				1							1						M
2016	Shernewski et. al	Beach macro-litter monitoring on southern Baltic beaches: results, experiences and recommendations	2016	Ludwigsburg, Germany			1			1				1							1						M
2016	Shernewski et. al	Beach macro-litter monitoring on southern Baltic beaches: results, experiences and recommendations	2016	Mukran, Germany	54.4931	13.6029	1			1				1							1						M
2016	Shernewski et. al	Beach macro-litter monitoring on southern Baltic beaches: results, experiences and recommendations	2016	Nemirseta, Lithuania	55.8878	21.0537	1			1	1			1							1						M
2016	Shernewski et. al	Beach macro-litter monitoring on southern Baltic beaches: results, experiences and recommendations	2016	Nobbin, Germany	54.6507	13.3884	1			1				1							1						M
2016	Shernewski et. al	Beach macro-litter monitoring on southern Baltic beaches: results, experiences and recommendations	2016	Palanga, Lithuania	55.9229	21.0528	1			1	1			1							1						M
2016	Shernewski et. al	Beach macro-litter monitoring on southern Baltic beaches: results, experiences and recommendations	2016	Poel, Germany	53.9957	11.4427	1			1				1							1						M
2016	Shernewski et. al	Beach macro-litter monitoring on southern Baltic beaches: results, experiences and recommendations	2016	Rosenhagen, Germany	53.9657	10.9354	1			1				1							1						M
2016	Shernewski et. al	Beach macro-litter monitoring on southern Baltic beaches: results, experiences and recommendations	2016	Sellin, Germany	54.383	13.7005	1			1				1							1						M
2016	Shernewski et. al	Beach macro-litter monitoring on southern Baltic beaches: results, experiences and recommendations	2016	Steinbeck, Germany	54.0095	11.1461	1			1				1							1						M
2016	Shernewski et. al	Beach macro-litter monitoring on southern Baltic beaches: results, experiences and recommendations	2016	Stubbenkammer, Germany	54.5735	13.663	1			1				1							1						M
2016	Shernewski et. al	Beach macro-litter monitoring on southern Baltic beaches: results, experiences and recommendations	2016	Tarnewitzer Huk, Germany	53.9851	11.2509	1			1				1							1						M
2016	Shernewski et. al	Beach macro-litter monitoring on southern Baltic beaches: results, experiences and recommendations	2016	Usedom, Germany	53.8769	13.9225	1			1				1							1						M
2016	Shernewski et. al	Beach macro-litter monitoring on southern Baltic beaches: results, experiences and recommendations	2016	Varnkevitz, Germany	54.6817	13.3696	1			1				1							1						M
2016	Shernewski et. al	Beach macro-litter monitoring on southern Baltic beaches: results, experiences and recommendations	2016	Vilm, Germany	54.3257	13.5359	1			1	1			1							1						M
2016	Shernewski et. al	Beach macro-litter monitoring on southern Baltic beaches: results, experiences and recommendations	2016	Warnemunde, Germany	54.1705	12.0781	1			1				1							1						M
2016	Shernewski et. al	Beach macro-litter monitoring on southern Baltic beaches: results, experiences and recommendations	2016	Zingst Kirchweg, Germany	54.4417	12.6884	1			1				1							1						M
2016	Shernewski et. al	Beach macro-litter monitoring on southern Baltic beaches: results, experiences and recommendations	2016	Zingst Wasserweg, Germany	54.4419	12.6897	1			1				1							1						M
2017	Vincent and Hoellein	Anthropogenic litter abundance and accumulation rates point to seasonal litter sources on a great lakes beach	2017	Pratt Beach, Chicago, Illinois	42.0067	-87.6564	1				0.75	1		1	1		1				1						F
2017	Thushari et al	Coastal debris analysis in beaches of Chonburi Province, eastern of Thailand as implications for coastal conservation	2017	Angsila, Thailand	13.316	100.918	1	1			1	1		1		1		1			1						M
2017	Thushari et al	Coastal debris analysis in beaches of Chonburi Province, eastern of Thailand as implications for coastal conservation	2017	Bangsaen, Thailand	13.2987	100.902	1	1			1	1		1		1		1			1						M
2017	Thushari et al	Coastal debris analysis in beaches of Chonburi Province, eastern of Thailand as implications for coastal conservation	2017	Samaesarn, Thailand	12.5663	100.949	1	1			1	1		1		1		1			1						M
2017	Rangel-Buitrago et al	Magnitudes, sources, and management of beach litter along the Atlantico department coastline, Caribbean coast of Colombia	2017	Punta Roca, Colombia	11.038	-74.9219	1		1								1				1						M
2017	Rangel-Buitrago et al	Magnitudes, sources, and management of beach litter along the Atlantico department coastline, Caribbean coast of Colombia	2017	Salgar, Colombia	11.0209	-74.9335	1		1								1				1						M
2017	Rangel-Buitrago et al	Magnitudes, sources, and management of beach litter along the Atlantico department coastline, Caribbean coast of Colombia	2017	Pradomar, Colombia	11.0064	-74.9528	1		1								1				1						M
2017	Rangel-Buitrago et al	Magnitudes, sources, and management of beach litter along the Atlantico department coastline, Caribbean coast of Colombia	2017	Pradomar, Colombia	11.0035	-74.9536	1		1								1				1						M
2017	Rangel-Buitrago et al	Magnitudes, sources, and management of beach litter along the Atlantico department coastline, Caribbean coast of Colombia	2017	Puerto Colombia Nort, Colombia	10.9981	-74.9541	1		1								1				1						M
2017	Rangel-Buitrago et al	Magnitudes, sources, and management of beach litter along the Atlantico department coastline, Caribbean coast of Colombia	2017	Puerto Colombia, Colombia	10.9878	-74.9613	1		1								1				1						M
2017	Rangel-Buitrago et al	Magnitudes, sources, and management of beach litter along the Atlantico department coastline, Caribbean coast of Colombia	2017	Puerto Velero, Colombia	10.9485	-75.0471	1		1								1				1						M
2017	Rangel-Buitrago et al	Magnitudes, sources, and management of beach litter along the Atlantico department coastline, Caribbean coast of Colombia	2017	Puerto Velero, Colombia	10.9452	-75.0402	1		1								1				1						M
2017	Rangel-Buitrago et al	Magnitudes, sources, and management of beach litter along the Atlantico department coastline, Caribbean coast of Colombia	2017	Puerto Velero, Colombia	10.9517	-75.0293	1		1								1				1						M
2017	Rangel-Buitrago et al	Magnitudes, sources, and management of beach litter along the Atlantico department coastline, Caribbean coast of Colombia	2017	Puerto Velero, Colombia	10.9377	-75.0512	1		1								1				1						M
2017	Rangel-Buitrago et al	Magnitudes, sources, and management of beach litter along the Atlantico department coastline, Caribbean coast of Colombia	2017	Cano Dulce, Colombia	10.9384	-75.028	1		1								1				1						M
2017	Rangel-Buitrago et al	Magnitudes, sources, and management of beach litter along the Atlantico department coastline, Caribbean coast of Colombia	2017	Puerto Caimen, Colombia	10.9176	-75.0343	1		1								1				1						M
2017	Rangel-Buitrago et al	Magnitudes, sources, and management of beach litter along the Atlantico department coastline, Caribbean coast of Colombia	2017	Playa Mendoza, Colombia	10.9045	-75.0418	1		1								1				1						M
2017	Rangel-Buitrago et al	Magnitudes, sources, and management of beach litter along the Atlantico department coastline, Caribbean coast of Colombia	2017	Turipana, Colombia	10.8985	-75.0468	1		1								1				1						M
2017	Rangel-Buitrago et al	Magnitudes, sources, and management of beach litter along the Atlantico department coastline, Caribbean coast of Colombia	2017	Tubara, Colombia	10.8965	-75.0496	1		1								1				1						M
2017	Rangel-Buitrago et al	Magnitudes, sources, and management of beach litter along the Atlantico department coastline, Caribbean coast of Colombia	2017	Palmarito, Colombia	10.8923	-75.057	1		1								1				1						M
2017	Rangel-Buitrago et al	Magnitudes, sources, and management of beach litter along the Atlantico department coastline, Caribbean coast of Colombia	2017	Playa Linda, Colombia	10.8892	-75.0615	1		1								1				1						M
2017	Rangel-Buitrago et al	Magnitudes, sources, and management of beach litter along the Atlantico department coastline, Caribbean coast of Colombia	2017	Santa Veronica, Colombia	10.8864	-75.0781	1		1								1				1						M
2017	Rangel-Buitrago et al	Magnitudes, sources, and management of beach litter along the Atlantico department coastline, Caribbean coast of Colombia	2017	Santa Veronica, Colombia	10.8804	-75.0835	1		1								1				1						M
2017	Rangel-Buitrago et al	Magnitudes, sources, and management of beach litter along the Atlantico department coastline, Caribbean coast of Colombia	2017	Salinas del Ray, Colombia	10.8711	-75.1004	1		1								1				1						M
2017	Rangel-Buitrago et al	Magnitudes, sources, and management of beach litter along the Atlantico department coastline, Caribbean coast of Colombia	2017	Loma de Piedra, Colombia	10.8605	-75.1297	1		1								1				1						M
2017	Rangel-Buitrago et al	Magnitudes, sources, and management of beach litter along the Atlantico department coastline, Caribbean coast of Colombia	2017	Aguamarina, Colombia	10.8349	-75.1515	1		1								1				1						M
2017	Rangel-Buitrago et al	Magnitudes, sources, and management of beach litter along the Atlantico department coastline, Caribbean coast of Colombia	2017	Bocatocinos, Colombia	10.8177	-75.2011	1		1								1				1						M
2017	Rangel-Buitrago et al	Magnitudes, sources, and management of beach litter along the Atlantico department coastline, Caribbean coast of Colombia	2017	Punta Astilleros, Colombia	10.7965	-75.2217	1		1								1				1						M
2017	Rangel-Buitrago et al	Magnitudes, sources, and management of beach litter along the Atlantico department coastline, Caribbean coast of Colombia	2017	Salinas de Galerazamba, Colombia	10.7987	-75.2561	1		1								1				1						M
2017	Rangel-Buitrago et al	Magnitudes, sources, and management of beach litter along the Atlantico department coastline, Caribbean coast of Colombia	2017	Galerazamba, Colombia	10.7898	-75.2635	1		1								1				1						M
2016	Poeta et al	The cotton buds beach: Marine litter assessment along the Tyrrhenian coast of central Italy following the marine strategy framework directive	2016	Lazio Region, Italy	42.357	11.5114	1			1	1			1							1						M
2016	Poeta et al	The cotton buds beach: Marine litter assessment along the Tyrrhenian coast of central Italy following the marine strategy framework directive	2016	Lazio Region, Italy	42.3454	11.5418	1			1	1			1							1						M
2016	Poeta et al	The cotton buds beach: Marine litter assessment along the Tyrrhenian coast of central Italy following the marine strategy framework directive	2016	Lazio Region, Italy	42.3307	11.5713	1			1	1			1							1						M
2017	Hengstmann et al	Marine litter abundance and distribution on beaches on the Isle of Rugen considering the influence of exposition, morphology and recreational activities	2017	Vernkevitz North Beach, Isle of Rugen, Germany	54.6831	13.3759	1		1								1				1	1					M
2017	Hengstmann et al	Marine litter abundance and distribution on beaches on the Isle of Rugen considering the influence of exposition, morphology and recreational activities	2017	Vernkevitz North Beach, Isle of Rugen, Germany	54.6803	13.363	1		1								1				1						M
2017	Hengstmann et al	Marine litter abundance and distribution on beaches on the Isle of Rugen considering the influence of exposition, morphology and recreational activities	2017	Vitt East Beach, Isle of Rugen, Germany	54.6658	13.4323	1		1								1				1	1					M
2017	Hengstmann et al	Marine litter abundance and distribution on beaches on the Isle of Rugen considering the influence of exposition, morphology and recreational activities	2017	Dranske West Beach, Isle of Rugen, Germany	54.6471	13.2296	1		1								1				1	1					M
2016	Fazey and Ryan	Debris size and buoyancy influence the dispersal distance of stranded litter	2016	Milnerton, Western Cape Province, South Africa	-33.8611	18.4891	1		1							1					1						M
2016	Fazey and Ryan	Debris size and buoyancy influence the dispersal distance of stranded litter	2016	Muizenberg, Western Cape Province, South Africa	-34.1086	18.4699	1		1							1					1						M
2016	Fazey and Ryan	Debris size and buoyancy influence the dispersal distance of stranded litter	2016	16 Mile Beach, Western Cape Province, South Africa	-33.2751	18.1347	1		1							1					1						M
2016	Fazey and Ryan	Debris size and buoyancy influence the dispersal distance of stranded litter	2016	Die Plaat, Western Cape Province, South Africa	-34.4171	19.2955	1		1							1					1						M
2016	Fazey and Ryan	Debris size and buoyancy influence the dispersal distance of stranded litter	2016	Rocher Pan Nature Reserve, Western Cape Province, South Africa	-32.737	18.1829	1		1							1					1						M
2016	Fazey and Ryan	Debris size and buoyancy influence the dispersal distance of stranded litter	2016	De Mond Nature Reserve, Western Cape Province, South Africa	-34.7734	19.8873	1		1							1					1						M
2016	Fazey and Ryan	Debris size and buoyancy influence the dispersal distance of stranded litter	2016	Tristan da Cunha & Gough Island	-37.1006	-12.3425	1					1		1		1					1	1					M
2016	Bouwman et al	The flip-or-flop boutique: Marine debris on the shores of St Brandon's rock, an isolated tropical atoll in the Indian Ocean	2016	Petit Raphael South, Republic of Mauritius	-16.4502	59.6132	1		1							1					1						M
2016	Bouwman et al	The flip-or-flop boutique: Marine debris on the shores of St Brandon's rock, an isolated tropical atoll in the Indian Ocean	2016	Bouquet, Republic of Mauritius	-16.521	59.7104	1		1							1					1						M
2016	Bouwman et al	The flip-or-flop boutique: Marine debris on the shores of St Brandon's rock, an isolated tropical atoll in the Indian Ocean	2016	Baleine, Republic of Mauritius	-16.7151	59.5682	1		1							1					1						M
2016	Bouwman et al	The flip-or-flop boutique: Marine debris on the shores of St Brandon's rock, an isolated tropical atoll in the Indian Ocean	2016	La Derive, Republic of Mauritius	-16.8187	59.4959	1		1							1					1						M
2016	Bouwman et al	The flip-or-flop boutique: Marine debris on the shores of St Brandon's rock, an isolated tropical atoll in the Indian Ocean	2016	Sirene, Republic of Mauritius	-16.4684	59.5801	1		1							1					1						M
2016	Bouwman et al	The flip-or-flop boutique: Marine debris on the shores of St Brandon's rock, an isolated tropical atoll in the Indian Ocean	2016	Roseate Island, Republic of Mauritius	-16.8196	59.4912	1		1							1					1						M
2016	Bouwman et al	The flip-or-flop boutique: Marine debris on the shores of St Brandon's rock, an isolated tropical atoll in the Indian Ocean	2016	Loup Garou, Republic of Mauritius	-16.8029	59.5386	1		1							1					1						M
2016	Bouwman et al	The flip-or-flop boutique: Marine debris on the shores of St Brandon's rock, an isolated tropical atoll in the Indian Ocean	2016	Digier, Republic of Mauritius	-16.8215	59.4856	1		1							1					1						M
2016	Bouwman et al	The flip-or-flop boutique: Marine debris on the shores of St Brandon's rock, an isolated tropical atoll in the Indian Ocean	2016	Ile Paul, Republic of Mauritius	-16.5736	59.7026	1		1							1					1						M
2016	Bouwman et al	The flip-or-flop boutique: Marine debris on the shores of St Brandon's rock, an isolated tropical atoll in the Indian Ocean	2016	Albatros, Republic of Mauritius	-16.2411	59.5919	1		1							1					1						M
2016	Bouwman et al	The flip-or-flop boutique: Marine debris on the shores of St Brandon's rock, an isolated tropical atoll in the Indian Ocean	2016	Puit a Eau, Republic of Mauritius	-16.4225	59.6109	1		1							1					1						M
2016	Bouwman et al	The flip-or-flop boutique: Marine debris on the shores of St Brandon's rock, an isolated tropical atoll in the Indian Ocean	2016	Ile Tortue, Republic of Mauritius	-16.4836	59.6871	1		1							1					1						M
2016	Bouwman et al	The flip-or-flop boutique: Marine debris on the shores of St Brandon's rock, an isolated tropical atoll in the Indian Ocean	2016	Gr Capitaine, Republic of Mauritius	-16.8161	59.5109	1		1							1					1						M
2016	Bouwman et al	The flip-or-flop boutique: Marine debris on the shores of St Brandon's rock, an isolated tropical atoll in the Indian Ocean	2016	Chaloupe, Republic of Mauritius	-16.7214	59.5754	1		1							1					1						M
2016	Bouwman et al	The flip-or-flop boutique: Marine debris on the shores of St Brandon's rock, an isolated tropical atoll in the Indian Ocean	2016	Ile Cocos, Republic of Mauritius	-16.7524	59.5724	1		1							1					1						M
2016	Aydin et al	The influence of land use on coastal litter: An approach to identify abundance and sources in the coastal area of Cilician Basin, Turkey	2016	Kum Mahallesi (Kum), Turkey	36.3082	33.9084	1		1												1						M
2016	Aydin et al	The influence of land use on coastal litter: An approach to identify abundance and sources in the coastal area of Cilician Basin, Turkey	2016	Goksu Delta (Gok), Turkey	36.2951	33.9772	1		1												1						M
2016	Aydin et al	The influence of land use on coastal litter: An approach to identify abundance and sources in the coastal area of Cilician Basin, Turkey	2016	Arkum (Ark), Turkey	36.3581	34.0786	1		1												1						M
2016	Aydin et al	The influence of land use on coastal litter: An approach to identify abundance and sources in the coastal area of Cilician Basin, Turkey	2016	Yemiskum (Yem), Turkey	36.4952	34.1825	1		1												1						M
2016	Aydin et al	The influence of land use on coastal litter: An approach to identify abundance and sources in the coastal area of Cilician Basin, Turkey	2016	Arpacbahsis (Arp), Turkey	36.639	34.3635	1		1												1						M
2016	Aydin et al	The influence of land use on coastal litter: An approach to identify abundance and sources in the coastal area of Cilician Basin, Turkey	2016	Mezitli (Mez), Turkey	36.7072	34.4673	1		1												1						M
2016	Aydin et al	The influence of land use on coastal litter: An approach to identify abundance and sources in the coastal area of Cilician Basin, Turkey	2016	Kazanli (Kaz), Turkey	36.8108	34.7578	1		1												1						M
2016	Aydin et al	The influence of land use on coastal litter: An approach to identify abundance and sources in the coastal area of Cilician Basin, Turkey	2016	Baharli (Bah), Turkey	36.7318	34.9137	1		1												1						M
2016	Aydin et al	The influence of land use on coastal litter: An approach to identify abundance and sources in the coastal area of Cilician Basin, Turkey	2016	Tuzla (Tuz), Turkey	36.6766	35.0777	1		1												1						M
2016	Aydin et al	The influence of land use on coastal litter: An approach to identify abundance and sources in the coastal area of Cilician Basin, Turkey	2016	Yumurtalik (Yum), Turkey	36.7676	35.7845	1		1												1						M
2016	Aydin et al	The influence of land use on coastal litter: An approach to identify abundance and sources in the coastal area of Cilician Basin, Turkey	2016	Dortyol (Dor), Turkey	36.8203	36.1804	1		1													1					M
2016	Aydin et al	The influence of land use on coastal litter: An approach to identify abundance and sources in the coastal area of Cilician Basin, Turkey	2016	Gulcihan Koyu (Gul), Turkey	36.464	35.9519	1		1												1						M
2016	Aydin et al	The influence of land use on coastal litter: An approach to identify abundance and sources in the coastal area of Cilician Basin, Turkey	2016	Kale Koyu (Kal), Turkey	36.2912	35.785	1		1												1						M
2015	Lee et al	Distribution and size relationships of plastic marine debris on beaches in South Korea	2015	Tae-An, South Korea	36.7868	126.144	1	1	1							1					1						M
2015	Lee et al	Distribution and size relationships of plastic marine debris on beaches in South Korea	2015	Shin-An, South Korea	35.1123	126.089	1	1	1							1					1						M
2015	Lee et al	Distribution and size relationships of plastic marine debris on beaches in South Korea	2015	Go-Heung, South Korea	34.5016	127.156	1	1	1							1					1						M
2015	Lee et al	Distribution and size relationships of plastic marine debris on beaches in South Korea	2015	Yeo-Su, South Korea	34.8212	127.584	1	1	1							1					1						M
2015	Lee et al	Distribution and size relationships of plastic marine debris on beaches in South Korea	2015	Ul-Jin, South Korea	37.0557	129.415	1	1	1							1					1						M
2015	Lee et al	Distribution and size relationships of plastic marine debris on beaches in South Korea	2015	Kang-Reung, South Korea	37.8278	128.873	1	1	1							1					1						M
2015	Lee et al	Distribution and size relationships of plastic marine debris on beaches in South Korea	2015	Bo-Ryeong, South Korea	36.3117	126.525	1	1	1							1					1						M
2015	Lee et al	Distribution and size relationships of plastic marine debris on beaches in South Korea	2015	Bu-An, South Korea	35.6261	126.484	1	1	1							1					1						M
2015	Lee et al	Distribution and size relationships of plastic marine debris on beaches in South Korea	2015	Go-Seong, South Korea	34.9557	128.221	1	1	1							1					1						M
2015	Lee et al	Distribution and size relationships of plastic marine debris on beaches in South Korea	2015	Tong-Yeong, South Korea	34.8285	128.45	1	1	1							1					1						M
2015	Lee et al	Distribution and size relationships of plastic marine debris on beaches in South Korea	2015	Po-Hang, South Korea	36.0905	129.412	1	1	1							1					1						M
2015	Lee et al	Distribution and size relationships of plastic marine debris on beaches in South Korea	2015	Sok-Cho, South Korea	38.1902	128.603	1	1	1							1					1						M
2015	Fauziah et al	Plastic debris in the coastal environment: The invisible threat? Abundance of buried plastic on Malaysian beaches	2015	Teluk Kemang Beach, Malaysia	2.45532	101.855		1				1		1		1		1			1	1					M
2015	Fauziah et al	Plastic debris in the coastal environment: The invisible threat? Abundance of buried plastic on Malaysian beaches	2015	Pasir Panjang Beach, Malaysia	2.42259	101.92		1				1		1		1		1			1	1					M
2015	Fauziah et al	Plastic debris in the coastal environment: The invisible threat? Abundance of buried plastic on Malaysian beaches	2015	Batu Burok Beach, Malaysia	5.32273	103.154		1				1		1		1		1			1	1					M
2015	Fauziah et al	Plastic debris in the coastal environment: The invisible threat? Abundance of buried plastic on Malaysian beaches	2015	Seberang Takir Beach, Malaysia	5.35591	103.131		1				1		1		1		1			1	1					M
2015	Fauziah et al	Plastic debris in the coastal environment: The invisible threat? Abundance of buried plastic on Malaysian beaches	2015	Tanjung Aru Beach, Malaysia	5.93845	116.047		1				1		1		1		1			1						M
2015	Fauziah et al	Plastic debris in the coastal environment: The invisible threat? Abundance of buried plastic on Malaysian beaches	2015	Teluk Likas Beach, Malaysia	6.00884	116.11		1				1		1		1		1			1	1					M
2015	Hoellein et al	Abundance and environmental drivers of anthropogenic litter on 5 Lake Michigan beaches: A study facilitated by citizen science data collection	2015	North Avenue, Illinois, USA	41.9147	-87.6252	1				0.75	1		1							1						F
2015	Hoellein et al	Abundance and environmental drivers of anthropogenic litter on 5 Lake Michigan beaches: A study facilitated by citizen science data collection	2015	Marquette Park, Indiana, USA	41.6203	-87.2652	1				0.75	1		1							1						F
2015	Hoellein et al	Abundance and environmental drivers of anthropogenic litter on 5 Lake Michigan beaches: A study facilitated by citizen science data collection	2015	West Side County Park, Michigan, USA	42.5739	-86.2316	1				0.75	1		1							1						F
2015	Hoellein et al	Abundance and environmental drivers of anthropogenic litter on 5 Lake Michigan beaches: A study facilitated by citizen science data collection	2015	Sand Bay, Wisconsin, USA	44.856	-87.498	1				0.75	1		1							1						F
2015	Hoellein et al	Abundance and environmental drivers of anthropogenic litter on 5 Lake Michigan beaches: A study facilitated by citizen science data collection	2015	Sleeping Bear Dunes, Michigan, USA	44.8911	-86.0652	1				0.75	1		1							1						F
2015	Poeta et al	Marine litter in Mediterranean sandy littorals: Spatial distribution patterns along central Italy coastal dunes	2015	Riva dei Taquini, Italy	42.2907	11.6396	1		1												1						M
2015	Poeta et al	Marine litter in Mediterranean sandy littorals: Spatial distribution patterns along central Italy coastal dunes	2015	Torre Flavia, Italy	41.9633	12.0445	1		1												1						M
2015	Poeta et al	Marine litter in Mediterranean sandy littorals: Spatial distribution patterns along central Italy coastal dunes	2015	Palidoro, Italy	41.9041	12.1539	1		1												1						M
2015	Poeta et al	Marine litter in Mediterranean sandy littorals: Spatial distribution patterns along central Italy coastal dunes	2015	Fiumicino-Focene, Italy	41.7978	12.2191	1		1												1						M
2015	Poeta et al	Marine litter in Mediterranean sandy littorals: Spatial distribution patterns along central Italy coastal dunes	2015	Torre Astura, Italy	41.4184	12.784	1		1												1						M
2015	Zhao et al	Characterization of small plastic debris on tourism beaches around the South China Sea	2015	Lovers Beach, Zhuhai, China	22.2611	113.597		1	1							1					1						M
2015	Zhao et al	Characterization of small plastic debris on tourism beaches around the South China Sea	2015	Black Sand Beach, Macau, China	22.118	113.57		1	1							1					1						M
2015	Zhao et al	Characterization of small plastic debris on tourism beaches around the South China Sea	2015	Cheung Sha Beach, HongKong, China	22.2335	113.949		1	1							1					1						M
2015	Zhao et al	Characterization of small plastic debris on tourism beaches around the South China Sea	2015	Sanniang Bay, Qinzhou, China	21.6238	108.78		1	1							1					1						M
2015	Zhao et al	Characterization of small plastic debris on tourism beaches around the South China Sea	2015	Silver Beach, Beihai, China	21.4072	109.165		1	1							1					1						M
2015	Zhao et al	Characterization of small plastic debris on tourism beaches around the South China Sea	2015	Shiluokou, Weizhou Island, China	21.0618	109.101		1	1							1					1						M
2014	Ryan et al	The effect of fine-scale sampling frequency on estimates of beach litter accumulation	2014	Milnerton, South Africa	-33.8783	18.488	1			1		1	1	1							1						M
2014	Ryan et al	The effect of fine-scale sampling frequency on estimates of beach litter accumulation	2014	Koeberg Nature Reserve, South Africa	-33.6661	18.4248	1			1		1	1	1							1						M
2014	Gago et al	Characteristics (abundance, type and origin) of beach litter on the Galician coast (NW Spain) from 2001 to 2010	2014	A Lanzada, Galicia, Spain	42.4482	-8.87604	1			1	1			1							1						M
2014	Gago et al	Characteristics (abundance, type and origin) of beach litter on the Galician coast (NW Spain) from 2001 to 2010	2014	Baldaio, Galicia, Spain	43.2992	-8.66399	1			1	1			1							1						M
2014	Gago et al	Characteristics (abundance, type and origin) of beach litter on the Galician coast (NW Spain) from 2001 to 2010	2014	O Rostro, Galicia, Spain	42.9714	-9.26048	1			1	1			1							1						M
2013	Lavers et al	Prevalence and composition of marine debris in Brown Booby (Sula leucogaster) nests at Ashmore Reef	2013	Ashmore Reef, Middle Island, Australia	-12.2658	123.035	1		1							1					1						M
2013	Hidalgo-Ruz and Thiel	Distribution and abundance of small plastic debris on beaches in the SE Pacific (Chile): A study supported by a citizen science project	2013	Las Machas, Arica, Chile	-18.4458	-70.3033		1	1							1	1		1		1						M
2013	Hidalgo-Ruz and Thiel	Distribution and abundance of small plastic debris on beaches in the SE Pacific (Chile): A study supported by a citizen science project	2013	Chinchorro, Arica, Chile	-18.463	-70.3051		1	1							1	1		1		1						M
2013	Hidalgo-Ruz and Thiel	Distribution and abundance of small plastic debris on beaches in the SE Pacific (Chile): A study supported by a citizen science project	2013	El Laucho, Arica, Chile	-18.4881	-70.3267		1	1							1	1		1		1						M
2013	Hidalgo-Ruz and Thiel	Distribution and abundance of small plastic debris on beaches in the SE Pacific (Chile): A study supported by a citizen science project	2013	La Lisera, Arica, Chile	-18.4932	-70.3259		1	1							1	1		1		1						M
2013	Hidalgo-Ruz and Thiel	Distribution and abundance of small plastic debris on beaches in the SE Pacific (Chile): A study supported by a citizen science project	2013	Bellavista, Iquique, Chile	-20.2171	-70.1561		1	1							1	1		1		1						M
2013	Hidalgo-Ruz and Thiel	Distribution and abundance of small plastic debris on beaches in the SE Pacific (Chile): A study supported by a citizen science project	2013	Cavancha, Iquique, Chile	-20.2304	-70.1469		1	1							1	1		1		1						M
2013	Hidalgo-Ruz and Thiel	Distribution and abundance of small plastic debris on beaches in the SE Pacific (Chile): A study supported by a citizen science project	2013	Juan Lopez, Antofagasta, Chile	-23.6528	-70.4016		1	1							1	1		1		1						M
2013	Hidalgo-Ruz and Thiel	Distribution and abundance of small plastic debris on beaches in the SE Pacific (Chile): A study supported by a citizen science project	2013	La Mansa, Caldera, Chile	-27.0659	-70.8249		1	1							1	1		1		1						M
2013	Hidalgo-Ruz and Thiel	Distribution and abundance of small plastic debris on beaches in the SE Pacific (Chile): A study supported by a citizen science project	2013	La Barranca, Punta de Choros, Chile	-29.2429	-71.464		1	1							1	1		1		1						M
2013	Hidalgo-Ruz and Thiel	Distribution and abundance of small plastic debris on beaches in the SE Pacific (Chile): A study supported by a citizen science project	2013	La Herradura, Coquimbo, Chile	-29.9838	-71.3654		1	1							1	1		1		1						M
2013	Hidalgo-Ruz and Thiel	Distribution and abundance of small plastic debris on beaches in the SE Pacific (Chile): A study supported by a citizen science project	2013	Mata Gorda, Los Vilos, Chile	-31.9043	-71.4994		1	1							1	1		1		1						M
2013	Hidalgo-Ruz and Thiel	Distribution and abundance of small plastic debris on beaches in the SE Pacific (Chile): A study supported by a citizen science project	2013	Easter Island, Ovahe, Chile	-27.0739	-109.314		1	1							1	1		1		1						M
2013	Hidalgo-Ruz and Thiel	Distribution and abundance of small plastic debris on beaches in the SE Pacific (Chile): A study supported by a citizen science project	2013	Grande, Papudo, Chile	-32.5029	-71.4415		1	1							1	1		1		1						M
2013	Hidalgo-Ruz and Thiel	Distribution and abundance of small plastic debris on beaches in the SE Pacific (Chile): A study supported by a citizen science project	2013	Zapallar, Zapallar, Chile	-32.5512	-71.4605		1	1							1	1		1		1						M
2013	Hidalgo-Ruz and Thiel	Distribution and abundance of small plastic debris on beaches in the SE Pacific (Chile): A study supported by a citizen science project	2013	La Laguna, Maitencillo, Chile	-32.631	-71.43		1	1							1	1		1		1						M
2013	Hidalgo-Ruz and Thiel	Distribution and abundance of small plastic debris on beaches in the SE Pacific (Chile): A study supported by a citizen science project	2013	Abanico, Maitencillo, Chile	-32.643	-71.4322		1	1							1	1		1		1						M
2013	Hidalgo-Ruz and Thiel	Distribution and abundance of small plastic debris on beaches in the SE Pacific (Chile): A study supported by a citizen science project	2013	Amarilla, Concon, Chile	-32.9232	-71.5246		1	1							1	1		1		1						M
2013	Hidalgo-Ruz and Thiel	Distribution and abundance of small plastic debris on beaches in the SE Pacific (Chile): A study supported by a citizen science project	2013	Torpederas, Valparaiso, Chile	-33.0224	-71.6441		1	1							1	1		1		1						M
2013	Hidalgo-Ruz and Thiel	Distribution and abundance of small plastic debris on beaches in the SE Pacific (Chile): A study supported by a citizen science project	2013	Portales, Valparaiso, Chile	-33.0322	-71.592		1	1							1	1		1		1						M
2013	Hidalgo-Ruz and Thiel	Distribution and abundance of small plastic debris on beaches in the SE Pacific (Chile): A study supported by a citizen science project	2013	San Carlos, Cartagena, Chile	-33.5169	-71.6091		1	1							1	1		1		1						M
2013	Hidalgo-Ruz and Thiel	Distribution and abundance of small plastic debris on beaches in the SE Pacific (Chile): A study supported by a citizen science project	2013	Desembocadura, San Antonio, Chile	-33.5935	-71.6062		1	1							1	1		1		1						M
2013	Hidalgo-Ruz and Thiel	Distribution and abundance of small plastic debris on beaches in the SE Pacific (Chile): A study supported by a citizen science project	2013	Llo Lleo, San Antonio, Chile	-33.612	-71.6272		1	1							1	1		1		1						M
2013	Hidalgo-Ruz and Thiel	Distribution and abundance of small plastic debris on beaches in the SE Pacific (Chile): A study supported by a citizen science project	2013	Las Terrazas, Pichilemu, Chile	-34.3837	-72.0123		1	1							1	1		1		1						M
2013	Hidalgo-Ruz and Thiel	Distribution and abundance of small plastic debris on beaches in the SE Pacific (Chile): A study supported by a citizen science project	2013	Piedra de la Iglesia, Constitucion, Chile	-35.3289	-72.4333		1	1							1	1		1		1						M
2013	Hidalgo-Ruz and Thiel	Distribution and abundance of small plastic debris on beaches in the SE Pacific (Chile): A study supported by a citizen science project	2013	Sector Pellines, Constitucion, Chile	-35.3283	-72.4146		1	1							1	1		1		1						M
2013	Hidalgo-Ruz and Thiel	Distribution and abundance of small plastic debris on beaches in the SE Pacific (Chile): A study supported by a citizen science project	2013	Curanipe, Curanipe, Chile	-35.8444	-72.6414		1	1							1	1		1		1						M
2013	Hidalgo-Ruz and Thiel	Distribution and abundance of small plastic debris on beaches in the SE Pacific (Chile): A study supported by a citizen science project	2013	Monolito, Chanco, Chile	-35.7395	-72.5703		1	1							1	1		1		1						M
2013	Hidalgo-Ruz and Thiel	Distribution and abundance of small plastic debris on beaches in the SE Pacific (Chile): A study supported by a citizen science project	2013	Pelluhue, Pelluhue, Chile	-35.8069	-72.5722		1	1							1	1		1		1						M
2013	Hidalgo-Ruz and Thiel	Distribution and abundance of small plastic debris on beaches in the SE Pacific (Chile): A study supported by a citizen science project	2013	Brava, Talcahuano, Chile	-36.7145	-73.1384		1	1							1	1		1		1						M
2013	Hidalgo-Ruz and Thiel	Distribution and abundance of small plastic debris on beaches in the SE Pacific (Chile): A study supported by a citizen science project	2013	El Maule, Puerto Saavedra, Chile	-38.7839	-73.3986		1	1							1	1		1		1						M
2013	Hidalgo-Ruz and Thiel	Distribution and abundance of small plastic debris on beaches in the SE Pacific (Chile): A study supported by a citizen science project	2013	Grande, Niebla, Chile	-39.863	-73.3952		1	1							1	1		1		1						M
2013	Hidalgo-Ruz and Thiel	Distribution and abundance of small plastic debris on beaches in the SE Pacific (Chile): A study supported by a citizen science project	2013	Chaihuin, Chaihuin, Chile	-39.9504	-73.5863		1	1							1	1		1		1						M
2013	Hidalgo-Ruz and Thiel	Distribution and abundance of small plastic debris on beaches in the SE Pacific (Chile): A study supported by a citizen science project	2013	Grande, Curinanco, Chile	-39.7322	-73.3964		1	1							1	1		1		1						M
2013	Hidalgo-Ruz and Thiel	Distribution and abundance of small plastic debris on beaches in the SE Pacific (Chile): A study supported by a citizen science project	2013	Pelluco, Puerto Montt, Chile	-41.487	-72.9009		1	1							1	1		1		1						M
2013	Hidalgo-Ruz and Thiel	Distribution and abundance of small plastic debris on beaches in the SE Pacific (Chile): A study supported by a citizen science project	2013	Arena Gruesa, Ancud, Chile	-41.8598	-73.8277		1	1							1	1		1		1						M
2013	Hidalgo-Ruz and Thiel	Distribution and abundance of small plastic debris on beaches in the SE Pacific (Chile): A study supported by a citizen science project	2013	La Puntilla sector TenTen, Castro, Chile	-42.4791	-73.7661		1	1							1	1		1		1						M
2013	Hidalgo-Ruz and Thiel	Distribution and abundance of small plastic debris on beaches in the SE Pacific (Chile): A study supported by a citizen science project	2013	Costanera, Quellon, Chile	-43.121	-73.6143		1	1							1	1		1		1						M
2013	Hidalgo-Ruz and Thiel	Distribution and abundance of small plastic debris on beaches in the SE Pacific (Chile): A study supported by a citizen science project	2013	Alcantilado, Puerto Aysen, Chile	-45.4084	-72.7002		1	1							1	1		1		1						M
2013	Hidalgo-Ruz and Thiel	Distribution and abundance of small plastic debris on beaches in the SE Pacific (Chile): A study supported by a citizen science project	2013	Costanera, Punta Arenas, Chile	-53.1644	-70.8993		1	1							1	1		1		1						M
2018	Dean, Corcoran and Helm	Factors influencing microplastic abundances in nearshore, tributary and beach sediments along the Ontario shoreline of Lake Erie	2018	Waverly, Ontario, Canada	42.8832	-78.944		1	1									1			1					1	F
2018	Dean, Corcoran and Helm	Factors influencing microplastic abundances in nearshore, tributary and beach sediments along the Ontario shoreline of Lake Erie	2018	Crystal, Ontario, Canada	42.8625	-79.0646		1	1									1			1					1	F
2018	Dean, Corcoran and Helm	Factors influencing microplastic abundances in nearshore, tributary and beach sediments along the Ontario shoreline of Lake Erie	2018	Long, Ontario, Canada	42.8647	-79.3864		1	1									1			1					1	F
2018	Dean, Corcoran and Helm	Factors influencing microplastic abundances in nearshore, tributary and beach sediments along the Ontario shoreline of Lake Erie	2018	Rondeau, Ontario, Canada	42.3212	-81.8442		1	1									1			1					1	F
2018	Dean, Corcoran and Helm	Factors influencing microplastic abundances in nearshore, tributary and beach sediments along the Ontario shoreline of Lake Erie	2018	Seacliff, Ontario, Canada	42.0298	-82.6053		1	1									1			1					1	F
2018	Dean, Corcoran and Helm	Factors influencing microplastic abundances in nearshore, tributary and beach sediments along the Ontario shoreline of Lake Erie	2018	Lakewood, Ontario, Canada	42.0372	-83.0724		1	1									1			1					1	F
2017	Blettler et al	Plastic pollution in freshwater ecosystems: macro-, meso-, and microplastic debris in a floodplain lake	2017	Argentina - Setubal lake	-31.617	-60.6733	1	1	1							1		1			1						F
2016	Zhang et al	Microplastic pollution of lakeshore sediments from remote lakes in Tibet plateau, China	2016	Siling Co, China	31.7713	89.3554		1	1															1		1	F
2016	Zhang et al	Microplastic pollution of lakeshore sediments from remote lakes in Tibet plateau, China	2016	Siling Co, China	31.8065	89.3699		1	1															1		1	F
2016	Zhang et al	Microplastic pollution of lakeshore sediments from remote lakes in Tibet plateau, China	2016	Siling Co, China	31.8641	88.5543		1	1															1		1	F
2016	Zhang et al	Microplastic pollution of lakeshore sediments from remote lakes in Tibet plateau, China	2016	Siling Co, China	31.6979	88.7502		1	1															1		1	F
2016	Zhang et al	Microplastic pollution of lakeshore sediments from remote lakes in Tibet plateau, China	2016	Geren Co, China	31.0202	88.5726		1	1															1		1	F
2016	Zhang et al	Microplastic pollution of lakeshore sediments from remote lakes in Tibet plateau, China	2016	Wuru Co, China	31.6361	87.827		1	1															1		1	F
2016	Zhang et al	Microplastic pollution of lakeshore sediments from remote lakes in Tibet plateau, China	2016	Mujiu Co, China	31.0031	89.0213		1	1															1		1	F
2016	Ballent et al	Sources and sinks of microplastics in Canadian Lake Ontario nearshore, tributary and beach sediments	2016	Beachway Park, Ontario, Canada	43.3094	-79.7998		1	1												1						F
2016	Ballent et al	Sources and sinks of microplastics in Canadian Lake Ontario nearshore, tributary and beach sediments	2016	Bronte Beach, Ontario, Canada	43.3921	-79.7102		1	1												1						F
2016	Ballent et al	Sources and sinks of microplastics in Canadian Lake Ontario nearshore, tributary and beach sediments	2016	Marie Curtis Park, Ontario, Canada	43.5833	-79.5425		1	1												1						F
2016	Ballent et al	Sources and sinks of microplastics in Canadian Lake Ontario nearshore, tributary and beach sediments	2016	Sunnyside Beach, Ontario, Canada	43.6368	-79.4513		1	1												1						F
2016	Ballent et al	Sources and sinks of microplastics in Canadian Lake Ontario nearshore, tributary and beach sediments	2016	Woodbine Beach, Ontario, Canada	43.662	-79.3081		1	1												1						F
2016	Fischer et al	Microplastic pollution in lakes and lake shoreline sediments: A case study on Lake Bolsena and Lake Chiusi (central Italy)	2016	Lake Bolsena, Italy	42.6474	11.9054		1	1							1		1			1						F
2016	Fischer et al	Microplastic pollution in lakes and lake shoreline sediments: A case study on Lake Bolsena and Lake Chiusi (central Italy)	2016	Lake Bolsena, Italy	42.5433	11.9918		1	1							1		1			1						F
2016	Fischer et al	Microplastic pollution in lakes and lake shoreline sediments: A case study on Lake Bolsena and Lake Chiusi (central Italy)	2016	Lake Chiusi, Italy	43.0581	11.9781		1	1							1		1			1						F
2016	Fischer et al	Microplastic pollution in lakes and lake shoreline sediments: A case study on Lake Bolsena and Lake Chiusi (central Italy)	2016	Lake Chiusi, Italy	43.0514	11.9575		1	1							1		1			1						F
2019	Acosta-Coley et al	Quantification of microplastics along the Caribbean coastline of Colombia - Pollution profile and biological effects on Caenorhabditis elegans	2019	Covenas, Colombia	9.40422	-75.6793		1			1			1		1		1			1						M
2019	Acosta-Coley et al	Quantification of microplastics along the Caribbean coastline of Colombia - Pollution profile and biological effects on Caenorhabditis elegans	2019	Cartagena, Colombia	10.4316	-75.5427		1			1			1		1		1			1						M
2019	Acosta-Coley et al	Quantification of microplastics along the Caribbean coastline of Colombia - Pollution profile and biological effects on Caenorhabditis elegans	2019	Puerto Colombia, Colombia	10.9996	-74.9532		1			1			1		1		1			1						M
2019	Acosta-Coley et al	Quantification of microplastics along the Caribbean coastline of Colombia - Pollution profile and biological effects on Caenorhabditis elegans	2019	Riohacha, Colombia	11.5524	-72.9117		1			1			1		1		1			1						M
2019	Masia et al	Microplastics in special protected areas for migratory birds in the Bay of Biscay	2019	Arnao, Spain	43.5485	-7.02161		1	1												1					1	M
2019	Masia et al	Microplastics in special protected areas for migratory birds in the Bay of Biscay	2019	Peñarronda, Spain	43.5532	-6.99686		1	1												1					1	M
2019	Masia et al	Microplastics in special protected areas for migratory birds in the Bay of Biscay	2019	Zeluán, Spain	43.5876	-5.91947		1	1												1					1	M
2019	Masia et al	Microplastics in special protected areas for migratory birds in the Bay of Biscay	2019	Xagó, Spain	43.599	-5.9265		1	1												1					1	M
2019	Masia et al	Microplastics in special protected areas for migratory birds in the Bay of Biscay	2019	El Puntal, Spain	43.526	-5.38819		1	1												1					1	M
2019	Masia et al	Microplastics in special protected areas for migratory birds in the Bay of Biscay	2019	Rodiles, Spain	43.5336	-5.37967		1	1												1					1	M
2019	Masia et al	Microplastics in special protected areas for migratory birds in the Bay of Biscay	2019	Gulpiyuri, Spain	43.4476	-4.88606		1	1												1					1	M
2019	Masia et al	Microplastics in special protected areas for migratory birds in the Bay of Biscay	2019	Cobijeru, Spain	43.3962	-4.61003		1	1												1					1	M
2019	Martinelli Filho and Monteiro	Widespread microplastics distribution at an Amazon macrotidal sandy beach	2019	Corvina Beach, Brazil	-0.603611	-47.3758		1	1												1					1	M
2018	Karkanoracharki et al	Plastic pellets, meso- and microplastics on the coastline of Northern Crete: Distribution and organic pollution	2018	Falassarna, Crete, Greece	35.4906	23.58		1			0.5			1							1						M
2018	Karkanoracharki et al	Plastic pellets, meso- and microplastics on the coastline of Northern Crete: Distribution and organic pollution	2018	Stavros, Crete, Greece	35.5915	24.0951		1			0.5			1							1						M
2018	Karkanoracharki et al	Plastic pellets, meso- and microplastics on the coastline of Northern Crete: Distribution and organic pollution	2018	Petres, Crete, Greece	35.3514	24.3576		1			0.5			1							1						M
2018	Karkanoracharki et al	Plastic pellets, meso- and microplastics on the coastline of Northern Crete: Distribution and organic pollution	2018	Analoukas, Crete, Greece	35.212	26.1862		1			0.5			1							1						M
2018	Rech et al	Anthropogenic marine litter composition in coastal areas may be a predictor of potentially invasive rafting fauna	2018	Penarronda, Spain	43.55	-6.99	1		1							1	1				1						M
2018	Rech et al	Anthropogenic marine litter composition in coastal areas may be a predictor of potentially invasive rafting fauna	2018	Navia, Spain	43.55	-6.72	1		1							1	1				1						M
2018	Rech et al	Anthropogenic marine litter composition in coastal areas may be a predictor of potentially invasive rafting fauna	2018	Barayo, Spain	43.56	-6.62	1		1							1	1				1						M
2018	Rech et al	Anthropogenic marine litter composition in coastal areas may be a predictor of potentially invasive rafting fauna	2018	Bayas, Spain	43.57	-6.04	1		1							1	1				1						M
2018	Rech et al	Anthropogenic marine litter composition in coastal areas may be a predictor of potentially invasive rafting fauna	2018	Salinas, Spain	43.58	-5.95	1		1							1	1				1						M
2018	Rech et al	Anthropogenic marine litter composition in coastal areas may be a predictor of potentially invasive rafting fauna	2018	Xago, Spain	43.6	-5.92	1		1							1	1				1						M
2018	Rech et al	Anthropogenic marine litter composition in coastal areas may be a predictor of potentially invasive rafting fauna	2018	Banugues, Spain	43.63	-5.81	1		1							1	1				1						M
2018	Rech et al	Anthropogenic marine litter composition in coastal areas may be a predictor of potentially invasive rafting fauna	2018	Xivares, Spain	43.57	-5.72	1		1							1	1				1						M
2018	Rech et al	Anthropogenic marine litter composition in coastal areas may be a predictor of potentially invasive rafting fauna	2018	Rodiles, Spain	43.53	-5.38	1		1							1	1				1						M
2018	Rech et al	Anthropogenic marine litter composition in coastal areas may be a predictor of potentially invasive rafting fauna	2018	Sta. Marina, Spain	43.47	-5.07	1		1							1	1				1						M
2018	Rech et al	Anthropogenic marine litter composition in coastal areas may be a predictor of potentially invasive rafting fauna	2018	Poo, Spain	43.43	-4.78	1		1							1	1				1						M
2018	Rech et al	Anthropogenic marine litter composition in coastal areas may be a predictor of potentially invasive rafting fauna	2018	Andrin, Spain	43.41	-4.71	1		1							1	1				1						M
2018	Owens	Using experiential marine debris education to make an impact: Collecting debris, informing policy makers, and influencing students	2018	Bluff Point State Park, Connecticut	41.3356	-72.0333	1		1						1									1			M
2018	Owens	Using experiential marine debris education to make an impact: Collecting debris, informing policy makers, and influencing students	2018	Hammonasset Beach, Connecticut	41.2668	-72.5584	1		1						1									1			M
2018	Owens	Using experiential marine debris education to make an impact: Collecting debris, informing policy makers, and influencing students	2018	Meigs Point, Connecticut	41.2525	-72.5459	1					1		1	1							1					M
2018	Andrades et al	Marine debris in Trindade Island, a remote island of the South Atlantic	2018	Cabritos, Trindade Island, Brazil	-20.4929	-29.3303	1		1												1						M
2018	Andrades et al	Marine debris in Trindade Island, a remote island of the South Atlantic	2018	Calheta, Trindade Island, Brazil	-20.5063	-29.3144	1		1												1						M
2018	Andrades et al	Marine debris in Trindade Island, a remote island of the South Atlantic	2018	Tartarugas, Trindade Island, Brazil	-20.5167	-29.3032	1		1												1						M
2018	Andrades et al	Marine debris in Trindade Island, a remote island of the South Atlantic	2018	Tunel, Trinidade Island, Brazil	-20.5229	-29.3009	1		1												1						M
2018	Andrades et al	Marine debris in Trindade Island, a remote island of the South Atlantic	2018	Principe, Trindade Island, Brazil	-20.5211	-29.309	1		1												1						M
2018	Andrades et al	Marine debris in Trindade Island, a remote island of the South Atlantic	2018	Lixo, Trindade Island, Brazil	-20.5233	-29.3217	1		1												1						M
2018	Andrades et al	Marine debris in Trindade Island, a remote island of the South Atlantic	2018	Eme, Trindade Island, Brazil	-20.5169	-29.3329	1		1												1						M
2018	Andrades et al	Marine debris in Trindade Island, a remote island of the South Atlantic	2018	Noroeste, Trindade Island, Brazil	-20.505	-29.3441	1		1												1						M
2009	Bravo et al	Anthropogenic debris on beaches in the SE Pacific (Chile): Results from a national survey supported by volunteers	2009	Arica, Chile	-18.4749	-70.3118	1		1							1							1				M
2009	Bravo et al	Anthropogenic debris on beaches in the SE Pacific (Chile): Results from a national survey supported by volunteers	2009	Iquique, Chile	-20.2163	-70.1531	1		1							1							1				M
2009	Bravo et al	Anthropogenic debris on beaches in the SE Pacific (Chile): Results from a national survey supported by volunteers	2009	Tocopilla, Chile	-22.0885	-70.1968	1		1							1							1				M
2009	Bravo et al	Anthropogenic debris on beaches in the SE Pacific (Chile): Results from a national survey supported by volunteers	2009	Antofagasta, Chile	-23.6523	-70.3992	1		1							1							1				M
2009	Bravo et al	Anthropogenic debris on beaches in the SE Pacific (Chile): Results from a national survey supported by volunteers	2009	Chañaral, Chile	-26.3445	-70.622	1		1							1							1				M
2009	Bravo et al	Anthropogenic debris on beaches in the SE Pacific (Chile): Results from a national survey supported by volunteers	2009	Caldera, Chile	-27.0658	-70.8237	1		1							1							1				M
2009	Bravo et al	Anthropogenic debris on beaches in the SE Pacific (Chile): Results from a national survey supported by volunteers	2009	Huasco, Chile	-28.4658	-71.2192	1		1							1							1				M
2009	Bravo et al	Anthropogenic debris on beaches in the SE Pacific (Chile): Results from a national survey supported by volunteers	2009	Coquimbo, Chile	-29.9595	-71.3389	1		1							1							1				M
2009	Bravo et al	Anthropogenic debris on beaches in the SE Pacific (Chile): Results from a national survey supported by volunteers	2009	La Serena, Chile	-29.9121	-71.2561	1		1							1							1				M
2009	Bravo et al	Anthropogenic debris on beaches in the SE Pacific (Chile): Results from a national survey supported by volunteers	2009	Los Vilos, Chile	-31.9115	-71.5113	1		1							1							1				M
2009	Bravo et al	Anthropogenic debris on beaches in the SE Pacific (Chile): Results from a national survey supported by volunteers	2009	Puchuncaví, Chile	-32.7367	-71.484	1		1							1							1				M
2009	Bravo et al	Anthropogenic debris on beaches in the SE Pacific (Chile): Results from a national survey supported by volunteers	2009	Zapallar, Chile	-32.5529	-71.46	1		1							1							1				M
2009	Bravo et al	Anthropogenic debris on beaches in the SE Pacific (Chile): Results from a national survey supported by volunteers	2009	Navidad, Chile	-33.9583	-71.8313	1		1							1							1				M
2009	Bravo et al	Anthropogenic debris on beaches in the SE Pacific (Chile): Results from a national survey supported by volunteers	2009	Pichilemu, Chile	-34.3876	-72.0065	1		1							1							1				M
2009	Bravo et al	Anthropogenic debris on beaches in the SE Pacific (Chile): Results from a national survey supported by volunteers	2009	Llico, Chile	-34.7639	-72.0793	1		1							1							1				M
2009	Bravo et al	Anthropogenic debris on beaches in the SE Pacific (Chile): Results from a national survey supported by volunteers	2009	Bolleruca, Chile	-34.6893	-72.0521	1		1							1							1				M
2009	Bravo et al	Anthropogenic debris on beaches in the SE Pacific (Chile): Results from a national survey supported by volunteers	2009	Chanco, Chile	-35.7339	-72.5345	1		1							1							1				M
2009	Bravo et al	Anthropogenic debris on beaches in the SE Pacific (Chile): Results from a national survey supported by volunteers	2009	Constitución, Chile	-35.3278	-72.4153	1		1							1							1				M
2009	Bravo et al	Anthropogenic debris on beaches in the SE Pacific (Chile): Results from a national survey supported by volunteers	2009	Concepción, Chile	-36.8142	-73.0536	1		1							1							1				M
2009	Bravo et al	Anthropogenic debris on beaches in the SE Pacific (Chile): Results from a national survey supported by volunteers	2009	Lebu, Chile	-37.6094	-73.6502	1		1							1							1				M
2009	Bravo et al	Anthropogenic debris on beaches in the SE Pacific (Chile): Results from a national survey supported by volunteers	2009	Tirúa, Chile	-38.3424	-73.4951	1		1							1							1				M
2009	Bravo et al	Anthropogenic debris on beaches in the SE Pacific (Chile): Results from a national survey supported by volunteers	2009	Carahue, Chile	-38.7096	-73.168	1		1							1							1				M
2009	Bravo et al	Anthropogenic debris on beaches in the SE Pacific (Chile): Results from a national survey supported by volunteers	2009	Pto. Saavedra, Chile	-38.7824	-73.4012	1		1							1							1				M
2009	Bravo et al	Anthropogenic debris on beaches in the SE Pacific (Chile): Results from a national survey supported by volunteers	2009	Valdivia, Chile	-39.8192	-73.2456	1		1							1							1				M
2009	Bravo et al	Anthropogenic debris on beaches in the SE Pacific (Chile): Results from a national survey supported by volunteers	2009	Pto. Montt, Chile	-41.4713	-72.9466	1		1							1							1				M
2009	Bravo et al	Anthropogenic debris on beaches in the SE Pacific (Chile): Results from a national survey supported by volunteers	2009	Quemchi, Chile	-42.143	-73.4737	1		1							1							1				M
2009	Bravo et al	Anthropogenic debris on beaches in the SE Pacific (Chile): Results from a national survey supported by volunteers	2009	Chacabuco, Chile	-45.4628	-72.8195	1		1							1							1				M
2009	Bravo et al	Anthropogenic debris on beaches in the SE Pacific (Chile): Results from a national survey supported by volunteers	2009	Pto. Natales, Chile	-51.7309	-72.5023	1		1							1							1				M
2009	Bravo et al	Anthropogenic debris on beaches in the SE Pacific (Chile): Results from a national survey supported by volunteers	2009	Pta. Arenas, Chile	-53.1508	-70.9049	1		1							1							1				M
2018	Prevenios et al	Beach litter dynamics on Mediterranean coasts: Distinguishing sources and pathways	2018	Acharavi, Corfu Island, Greece	39.7995	19.8186	1			1	1	1		1							1						M
2018	Prevenios et al	Beach litter dynamics on Mediterranean coasts: Distinguishing sources and pathways	2018	Acharavi, Corfu Island, Greece	39.7147	19.866	1			1	1	1		1								1					M
2018	Prevenios et al	Beach litter dynamics on Mediterranean coasts: Distinguishing sources and pathways	2018	Halikounas, Corfu Island, Greece	39.4325	19.9252	1			1	1	1		1							1						M
2018	Prevenios et al	Beach litter dynamics on Mediterranean coasts: Distinguishing sources and pathways	2018	Issos, Corfu Island, Greece	39.4467	19.89	1			1	1	1		1							1						M
2016	Munari et al	Marine litter on Mediterranean shores: Analysis of composition, spatial distribution and sources in north-western Adriatic beaches	2016	Rosalina, Italy	45.1272	12.3202	1		1													1					M
2016	Munari et al	Marine litter on Mediterranean shores: Analysis of composition, spatial distribution and sources in north-western Adriatic beaches	2016	Volano, Italy	44.8042	12.2557	1		1													1					M
2016	Munari et al	Marine litter on Mediterranean shores: Analysis of composition, spatial distribution and sources in north-western Adriatic beaches	2016	Bellocchio, Italy	44.6224	12.2442	1		1													1					M
2016	Munari et al	Marine litter on Mediterranean shores: Analysis of composition, spatial distribution and sources in north-western Adriatic beaches	2016	Casalborsetti, Italy	44.55	12.282	1		1													1					M
2016	Munari et al	Marine litter on Mediterranean shores: Analysis of composition, spatial distribution and sources in north-western Adriatic beaches	2016	Bevano, Italy	44.3403	12.3045	1		1													1					M
1998	Bowman et al	Dynamics of Litter Pollution on Israeli Mediterranean Beaches: A Budgetary, Litter FluxApproach	1998	Habonim, Isreal	31.5915	34.4896	1			1	1	1		1		1						1					M
1998	Bowman et al	Dynamics of Litter Pollution on Israeli Mediterranean Beaches: A Budgetary, Litter FluxApproach	1998	Givat-Olga, Isreal	31.6777	34.5536	1			1	1	1		1		1						1					M
1998	Bowman et al	Dynamics of Litter Pollution on Israeli Mediterranean Beaches: A Budgetary, Litter FluxApproach	1998	Mokhmoret, Isreal	31.9352	34.7044	1			1	1	1		1		1					1						M
1998	Bowman et al	Dynamics of Litter Pollution on Israeli Mediterranean Beaches: A Budgetary, Litter FluxApproach	1998	Palmahim, Isreal	32.4068	34.8679	1			1	1	1		1		1					1						M
1998	Bowman et al	Dynamics of Litter Pollution on Israeli Mediterranean Beaches: A Budgetary, Litter FluxApproach	1998	Ashqelon, Isreal	32.4418	34.8772	1			1	1	1		1		1					1						M
1998	Bowman et al	Dynamics of Litter Pollution on Israeli Mediterranean Beaches: A Budgetary, Litter FluxApproach	1998	Shiqma, Isreal	32.6391	34.9241	1			1	1	1		1		1					1						M
2017	Bergmann et al	Citizen scientists reveal: Marine litter pollutes Arctic beaches and affects wild life	2017	Brucebukta, Svalbard, Norway	78.4499	11.7123	1		1						1							1					M
2017	Bergmann et al	Citizen scientists reveal: Marine litter pollutes Arctic beaches and affects wild life	2017	Reinstrandodden, Svalbard, Norway	79.7334	13.8503	1		1						1							1					M
2017	Bergmann et al	Citizen scientists reveal: Marine litter pollutes Arctic beaches and affects wild life	2017	Sørvika, Svalbard, Norway	79.9595	18.6471	1		1						1							1					M
2017	Bergmann et al	Citizen scientists reveal: Marine litter pollutes Arctic beaches and affects wild life	2017	Isflakbukta, Svalbard, Norway	80.6909	20.9109	1		1						1							1					M
2017	Bergmann et al	Citizen scientists reveal: Marine litter pollutes Arctic beaches and affects wild life	2017	Crozierpynten, Svalbard, Norway	79.9186	16.8377	1		1						1							1					M
2017	Bergmann et al	Citizen scientists reveal: Marine litter pollutes Arctic beaches and affects wild life	2017	Alpiniøya, Svalbard, Norway	80.3513	24.7529	1		1						1							1					M
2017	Alshawafi et al	Assessment of marine debris on the coastal wetland of Martil in the North-East of Morocco	2017	Martil, Morocco	35.617	-5.267	1	1			1			1		1					1	1					M
1987	Ryan	The origin and fate of artifacts stranded on islands in the African sector of the Southern Ocean	1987	Marion Island (Southern Ocean)	-46.8954	37.751	1		1												1						M
1987	Ryan	The origin and fate of artifacts stranded on islands in the African sector of the Southern Ocean	1987	Prince Edward Island	-46.6308	37.9404	1		1													1					M
1987	Ryan	The origin and fate of artifacts stranded on islands in the African sector of the Southern Ocean	1987	Gough Island	-40.3176	-9.93545	1		1													1					M
1987	Ryan	The origin and fate of artifacts stranded on islands in the African sector of the Southern Ocean	1987	Tristan de Cunha Island group	-37.25	-12.5	1		1												1						M
2013	Eriksson et al	Daily accumulation rates of marine debris on sub-Antarctic island beaches	2013	Macquarie Island	-54.0667	158.817	1				0.5	1	1	1		1	1			1	1	1					M
2013	Eriksson et al	Daily accumulation rates of marine debris on sub-Antarctic island beaches	2013	Heard Island	-53.1	73.5	1				0.5	1	1	1		1	1			1	1						M
2010	Browne et al	Spatial patterns of plastic debris along estuarine shorelines	2010	Tamar Estuary, Plymouth Sound, UK	50.4113	-4.2032	1	1	1							1					1	1					M
1980	Merrell	Accumulation of plastic litter on beaches of Amchitka Island, Alaska	1980	Amchitka Island, Alaska, USA	51.5422	178.983	1			1	0.75			1			1					1					M
1997	Walker et al	Marine debris surveys at Bird Island, South Georgia 1990-1995	1997	Bird Island, South Georgia	-54.0056	38.05	1			1	0.75	1		1							1	1					M
2014	Jang et al	Development and application of a technique for detecting beach litter using a Micro-Unmanned Aerial Vehicle	2014	Doomo Pebble Beach, Geoje Island, South Korea	34.9811	128.695	1		1													1					M
2014	Jang et al	Development and application of a technique for detecting beach litter using a Micro-Unmanned Aerial Vehicle	2014	Heungnam Beach, Geoje Island, South Korea	34.9601	128.715	1		1												1						M
2014	Jang et al	Development and application of a technique for detecting beach litter using a Micro-Unmanned Aerial Vehicle	2014	Sogye Pebble Beach, Geoje Island, South Korea	34.9369	128.715	1		1													1					M
2013	Thiel et al	Anthropogenic marine debris in the coastal environment: A multi-year comparison between coastal waters and local shores	2013	Punta Teatinos, Chile	-29.8231	-71.2903	1				1			1		1					1	1					M
2013	Thiel et al	Anthropogenic marine debris in the coastal environment: A multi-year comparison between coastal waters and local shores	2013	El Frances, Chile	-30.1044	-71.3767	1				1			1		1					1	1					M
2018	McWilliams, Liboiron & Wiersma	Rocky shoreline protocols miss microplastics in marine debris surveys (Fogo Island, Newfoundland and Labrador)	2018	Fogo Island, Newfoundland and Labrador, Canada	49.7308	-54.176		1				1	1	1		1					1	1					M
2018	Bosker et al	Microplastic pollution on Caribbean beaches in the Lesser Antilles	2018	Shoal Bay, Anguilla	18.2545	-63.032		1	1							1	1	1			1						M
2018	Bosker et al	Microplastic pollution on Caribbean beaches in the Lesser Antilles	2018	Crocus Bay, Anguilla	18.2189	-63.0677		1	1							1	1	1			1						M
2018	Bosker et al	Microplastic pollution on Caribbean beaches in the Lesser Antilles	2018	Forest Bay, Anguilla	18.1616	-63.1719		1	1							1	1	1			1						M
2018	Bosker et al	Microplastic pollution on Caribbean beaches in the Lesser Antilles	2018	Cove Bay, Anguilla	18.166	-63.1393		1	1							1	1	1			1						M
2018	Bosker et al	Microplastic pollution on Caribbean beaches in the Lesser Antilles	2018	Blowing Point, Anguilla	18.1767	-63.1162		1	1							1	1	1			1						M
2018	Bosker et al	Microplastic pollution on Caribbean beaches in the Lesser Antilles	2018	Savannah Bay, Anguilla	18.223	-63.0088		1	1							1	1	1			1						M
2018	Bosker et al	Microplastic pollution on Caribbean beaches in the Lesser Antilles	2018	Anse des Sables, St. Martin	18.0731	-63.1156		1	1							1	1	1			1						M
2018	Bosker et al	Microplastic pollution on Caribbean beaches in the Lesser Antilles	2018	Grande Case, St. Martin	18.1018	-63.0573		1	1							1	1	1			1						M
2018	Bosker et al	Microplastic pollution on Caribbean beaches in the Lesser Antilles	2018	Le Galion, St. Martin	18.1232	-63.0229		1	1							1	1	1			1						M
2018	Bosker et al	Microplastic pollution on Caribbean beaches in the Lesser Antilles	2018	Grande Cayes, St. Martin	18.1087	-63.0215		1	1							1	1	1			1						M
2018	Bosker et al	Microplastic pollution on Caribbean beaches in the Lesser Antilles	2018	Guana Bay, St. Maarten	18.0491	-63.0171		1	1							1	1	1			1						M
2018	Bosker et al	Microplastic pollution on Caribbean beaches in the Lesser Antilles	2018	Little Bay, St. Maarten	18.0245	-63.0524		1	1							1	1	1			1						M
2018	Bosker et al	Microplastic pollution on Caribbean beaches in the Lesser Antilles	2018	Maho Bay, St. Maarten	18.0399	-63.11		1	1							1	1	1			1						M
2018	Bosker et al	Microplastic pollution on Caribbean beaches in the Lesser Antilles	2018	Cupecoy Beach, St. Maarten	18.0499	-63.1354		1	1							1	1	1			1						M
2018	Bosker et al	Microplastic pollution on Caribbean beaches in the Lesser Antilles	2018	Baie de St. Jean, St. Barthelemy	17.9027	-62.8345		1	1							1	1	1			1						M
2018	Bosker et al	Microplastic pollution on Caribbean beaches in the Lesser Antilles	2018	Loirent Beach, St. Barthelemy	17.907	-62.8232		1	1							1	1	1			1						M
2018	Bosker et al	Microplastic pollution on Caribbean beaches in the Lesser Antilles	2018	Shell Beach, St. Barthelemy	17.8929	-62.8489		1	1							1	1	1				1					M
2018	Bosker et al	Microplastic pollution on Caribbean beaches in the Lesser Antilles	2018	Anse de Public, St. Barthelemy	17.9082	-62.8565		1	1							1	1	1			1						M
2018	Bosker et al	Microplastic pollution on Caribbean beaches in the Lesser Antilles	2018	Grande Saline, St. Barthelemy	17.8875	-62.8218		1	1							1	1	1			1						M
2018	Bosker et al	Microplastic pollution on Caribbean beaches in the Lesser Antilles	2018	Smokey Alley, St. Eustatius	17.5217	-62.9918		1	1							1	1	1			1						M
2018	Bosker et al	Microplastic pollution on Caribbean beaches in the Lesser Antilles	2018	Zeelandia, St. Eustatius	17.4952	-62.9996		1	1							1	1	1			1						M
2016	Clunies-Ross et al	Synthetic shorelines in New Zealand? Quantification and characterisation of microplastic pollution on Canterbury’s coastlines	2016	Amberley Beach, Canterbury, New Zealand	-43.174	172.778		1	1							1					1	1					M
2016	Clunies-Ross et al	Synthetic shorelines in New Zealand? Quantification and characterisation of microplastic pollution on Canterbury’s coastlines	2016	Akaroa, Canterbury, New Zealand	-43.8038	172.968		1	1							1					1						M
2016	Clunies-Ross et al	Synthetic shorelines in New Zealand? Quantification and characterisation of microplastic pollution on Canterbury’s coastlines	2016	New Brighton, Canterbury, New Zealand	-43.5114	172.733		1	1							1					1						M
2016	Clunies-Ross et al	Synthetic shorelines in New Zealand? Quantification and characterisation of microplastic pollution on Canterbury’s coastlines	2016	South New Brighton, Canterbury, New Zealand	-43.5301	172.74		1	1							1					1						M
2016	Clunies-Ross et al	Synthetic shorelines in New Zealand? Quantification and characterisation of microplastic pollution on Canterbury’s coastlines	2016	South Shore, Canterbury, New Zealand	-43.5488	172.747		1	1							1					1						M
2016	Clunies-Ross et al	Synthetic shorelines in New Zealand? Quantification and characterisation of microplastic pollution on Canterbury’s coastlines	2016	Clifton, Canterbury, New Zealand	-43.5662	172.758		1	1							1					1						M
2016	Clunies-Ross et al	Synthetic shorelines in New Zealand? Quantification and characterisation of microplastic pollution on Canterbury’s coastlines	2016	Estuary at Avon River mouth, Canterbury, New Zealand	-43.5451	172.729		1	1							1					1						M
2016	Clunies-Ross et al	Synthetic shorelines in New Zealand? Quantification and characterisation of microplastic pollution on Canterbury’s coastlines	2016	Estuary at Heathcote River mouth, Canterbury, New Zealand	-43.5451	172.729		1	1							1						1					M
2016	Clunies-Ross et al	Synthetic shorelines in New Zealand? Quantification and characterisation of microplastic pollution on Canterbury’s coastlines	2016	Corsair Bay, Canterbury, New Zealand	-43.6068	172.7		1	1							1					1						M
2016	Clunies-Ross et al	Synthetic shorelines in New Zealand? Quantification and characterisation of microplastic pollution on Canterbury’s coastlines	2016	Governor's Bay, Canterbury, New Zealand	-41.268	173.97		1	1							1					1						M
2014	Rech et al	Rivers as a source of marine litter – A study from the SE Pacific	2014	River Elqui, Chile	-29.8949	-71.2734	1		1							1	1						1				M
2014	Rech et al	Rivers as a source of marine litter – A study from the SE Pacific	2014	River Elqui, Chile	-30.0265	-70.7694	1		1							1	1						1				F
2014	Rech et al	Rivers as a source of marine litter – A study from the SE Pacific	2014	River Elqui, Chile	-30.1079	-70.4771	1		1							1	1						1				F
2014	Rech et al	Rivers as a source of marine litter – A study from the SE Pacific	2014	River Maipo, Chile	-33.6146	-71.6284	1		1							1	1						1				M
2014	Rech et al	Rivers as a source of marine litter – A study from the SE Pacific	2014	River Maipo, Chile	-33.717	-70.9245	1		1							1	1						1				F
2014	Rech et al	Rivers as a source of marine litter – A study from the SE Pacific	2014	River Maipo, Chile	-33.3697	-70.4183	1		1							1	1						1				F
2014	Rech et al	Rivers as a source of marine litter – A study from the SE Pacific	2014	River Maipo, Chile	-33.6972	-70.3358	1		1							1	1						1				F
2014	Rech et al	Rivers as a source of marine litter – A study from the SE Pacific	2014	River Maule, Chile	-35.3149	-72.4043	1		1							1	1						1				M
2014	Rech et al	Rivers as a source of marine litter – A study from the SE Pacific	2014	River Maule, Chile	-35.5587	-71.6672	1		1							1	1						1				F
2014	Rech et al	Rivers as a source of marine litter – A study from the SE Pacific	2014	River Maule, Chile	-35.7059	-71.0967	1		1							1	1						1				F
2014	Rech et al	Rivers as a source of marine litter – A study from the SE Pacific	2014	River BioBio, Chile	-36.8255	-73.1557	1		1							1	1						1				M
2014	Rech et al	Rivers as a source of marine litter – A study from the SE Pacific	2014	River BioBio, Chile	-37.5802	-72.5394	1		1							1	1						1				F
2014	Rech et al	Rivers as a source of marine litter – A study from the SE Pacific	2014	River BioBio, Chile	-37.6789	-71.9922	1		1							1	1						1				F
2014	Rech et al	Rivers as a source of marine litter – A study from the SE Pacific	2014	River BioBio, Chile	-37.8559	-71.7539	1		1							1	1						1				F
1988	Ryan and Watkins	Accumulation of stranded plastic objects and other artefacts at Inaccessible Island, central South Atlantic Ocean	1988	Inaccessible Island	-37.3	-12.68	1			1				1								1					M
1991	Slip and Burton	Accumulation of Fishing Debris, Plastic Litter, and Other Artefacts, on Heard and Macquarie Islands in the Southern Ocean	1991	Heard Island	-53.0833	73.5	1			1				1							1	1					M
1991	Slip and Burton	Accumulation of Fishing Debris, Plastic Litter, and Other Artefacts, on Heard and Macquarie Islands in the Southern Ocean	1991	Macquerie Island	-54.5833	158.917	1				0.5			1							1	1					M
2016	Unger and Harrison	Fisheries as a source of marine debris on beaches in the United Kingdom	2016	UK (1000 sites)			1			1				1		1					1	1					M
2001	Williams and Tudor	Litter burial and exhumation: spatial and temporal distribution on a cobble pocket beach	2001	Tresilian Bay, Wales	51.3991	-3.514	1					1		1								1					M
2014	Williams et al	From a millennium base line to 2012: Beach litter changes in Wales	2014	Rhyl, Wales	53.3256	-3.4886	1							1		1							1				M
2014	Williams et al	From a millennium base line to 2012: Beach litter changes in Wales	2014	Kimmel Bay, Wales	53.3135	-3.52265	1							1		1							1				M
2014	Williams et al	From a millennium base line to 2012: Beach litter changes in Wales	2014	Abergele, Wales	53.2945	-3.58746	1							1		1							1				M
2014	Williams et al	From a millennium base line to 2012: Beach litter changes in Wales	2014	Llandudno, Wales	53.3262	-3.82926	1							1		1							1				M
2014	Williams et al	From a millennium base line to 2012: Beach litter changes in Wales	2014	Penmaenmawr, Wales	53.2716	-3.92335	1							1		1							1				M
2014	Williams et al	From a millennium base line to 2012: Beach litter changes in Wales	2014	Porthdafach, Wales	53.2876	-4.65096	1							1		1							1				M
2014	Williams et al	From a millennium base line to 2012: Beach litter changes in Wales	2014	Llanfynach, Wales	53.259	-4.54848	1							1		1							1				M
2014	Williams et al	From a millennium base line to 2012: Beach litter changes in Wales	2014	Pwlhelli, Wales	52.8801	-4.41811	1							1		1							1				M
2014	Williams et al	From a millennium base line to 2012: Beach litter changes in Wales	2014	Criccieth, Wales	52.9191	-4.22768	1							1		1							1				M
2014	Williams et al	From a millennium base line to 2012: Beach litter changes in Wales	2014	Morfa Bychan, Wales	52.9105	-4.16556	1							1		1							1				M
2014	Williams et al	From a millennium base line to 2012: Beach litter changes in Wales	2014	Harlech, Wales	52.8571	-4.12465	1							1		1							1				M
2014	Williams et al	From a millennium base line to 2012: Beach litter changes in Wales	2014	Talybont, Wales	52.7708	-4.11025	1							1		1							1				M
2014	Williams et al	From a millennium base line to 2012: Beach litter changes in Wales	2014	Barmouth, Wales	52.7204	-4.05769	1							1		1							1				M
2014	Williams et al	From a millennium base line to 2012: Beach litter changes in Wales	2014	Fairborne, Wales	52.6976	-4.05892	1							1		1							1				M
2014	Williams et al	From a millennium base line to 2012: Beach litter changes in Wales	2014	Towyn, Wales	53.3019	-3.55815	1							1		1							1				M
2014	Williams et al	From a millennium base line to 2012: Beach litter changes in Wales	2014	Aberdovey, Wales	52.5459	-4.03565	1							1		1							1				M
2014	Williams et al	From a millennium base line to 2012: Beach litter changes in Wales	2014	Borth, Wales	52.4942	-4.05211	1							1		1							1				M
2014	Williams et al	From a millennium base line to 2012: Beach litter changes in Wales	2014	Aberystwyth, Wales	52.4165	-4.08607	1							1		1							1				M
2014	Williams et al	From a millennium base line to 2012: Beach litter changes in Wales	2014	Newquay, Wales	50.4216	-5.06933	1							1		1							1				M
2014	Williams et al	From a millennium base line to 2012: Beach litter changes in Wales	2014	Llangranog, Wales	52.1603	-4.47201	1							1		1							1				M
2014	Williams et al	From a millennium base line to 2012: Beach litter changes in Wales	2014	Tresaith, Wales	52.1355	-4.51771	1							1		1							1				M
2014	Williams et al	From a millennium base line to 2012: Beach litter changes in Wales	2014	Aberporth, Wales	52.1346	-4.54512	1							1		1							1				M
2014	Williams et al	From a millennium base line to 2012: Beach litter changes in Wales	2014	Mwnt, Wales	52.136	-4.64048	1							1		1							1				M
2014	Williams et al	From a millennium base line to 2012: Beach litter changes in Wales	2014	Poppit, Wales	52.1062	-4.69683	1							1		1							1				M
2014	Williams et al	From a millennium base line to 2012: Beach litter changes in Wales	2014	Newport, Wales	52.0287	-4.83814	1							1		1							1				M
2014	Williams et al	From a millennium base line to 2012: Beach litter changes in Wales	2014	Dinas, Wales	52.0217	-4.90969	1							1		1							1				M
2014	Williams et al	From a millennium base line to 2012: Beach litter changes in Wales	2014	Goodwick, Wales	52.0047	-4.99599	1							1		1							1				M
2014	Williams et al	From a millennium base line to 2012: Beach litter changes in Wales	2014	Nolton, Wales	51.8238	-5.10913	1							1		1							1				M
2014	Williams et al	From a millennium base line to 2012: Beach litter changes in Wales	2014	Broadhaven, Wales	51.6078	-4.92348	1							1		1							1				M
2014	Williams et al	From a millennium base line to 2012: Beach litter changes in Wales	2014	Freshwater West, Wales	51.6567	-5.05907	1							1		1							1				M
2014	Williams et al	From a millennium base line to 2012: Beach litter changes in Wales	2014	Angle, Wales	51.687	-5.10949	1							1		1							1				M
2014	Williams et al	From a millennium base line to 2012: Beach litter changes in Wales	2014	Tenby North, Wales	51.6761	-4.70149	1							1		1							1				M
2014	Williams et al	From a millennium base line to 2012: Beach litter changes in Wales	2014	Tenby South, Wales	51.6672	-4.70195	1							1		1							1				M
2014	Williams et al	From a millennium base line to 2012: Beach litter changes in Wales	2014	Wisemans Bridge, Wales	51.7238	-4.68435	1							1		1							1				M
2014	Williams et al	From a millennium base line to 2012: Beach litter changes in Wales	2014	Amroth, Wales	51.7349	-4.63568	1							1		1							1				M
2014	Williams et al	From a millennium base line to 2012: Beach litter changes in Wales	2014	Amroth Castle, Wales	51.734	-4.65205	1							1		1							1				M
2014	Williams et al	From a millennium base line to 2012: Beach litter changes in Wales	2014	Pendine, Wales	51.7334	-4.53335	1							1		1							1				M
2014	Williams et al	From a millennium base line to 2012: Beach litter changes in Wales	2014	Port Einon, Wales	51.5438	-4.20589	1							1		1							1				M
2014	Williams et al	From a millennium base line to 2012: Beach litter changes in Wales	2014	Swansea Bay, Wales	51.6141	-3.86672	1							1		1							1				M
2014	Williams et al	From a millennium base line to 2012: Beach litter changes in Wales	2014	Porthcawl Rest Bay, Wales	51.4891	-3.72351	1							1		1							1				M
2014	Williams et al	From a millennium base line to 2012: Beach litter changes in Wales	2014	Sandy Bay, Wales	51.4784	-3.69379	1							1		1							1				M
2014	Williams et al	From a millennium base line to 2012: Beach litter changes in Wales	2014	Trecco Bay, Wales	51.477	-3.68409	1							1		1							1				M
2014	Williams et al	From a millennium base line to 2012: Beach litter changes in Wales	2014	Southerndown, Wales	51.4463	-3.60526	1							1		1							1				M
2014	Williams et al	From a millennium base line to 2012: Beach litter changes in Wales	2014	Llantwit Major, Wales	51.3966	-3.50164	1							1		1							1				M
2014	Williams et al	From a millennium base line to 2012: Beach litter changes in Wales	2014	Lavernock, Wales	51.4074	-3.1756	1							1		1							1				M
2019	Haarr et al	A novel GIS-based tool for predicting coastal litter accumulation and optimising coastal cleanup actions	2019	Lofoten, Norway			1		1															1			M
2018	Brennan et al	Connecting flux, deposition and resuspension in coastal debris surveys	2018	Murramarang National Park, Australia	-35.5754	150.362	1					1	1	1							1						M
2018	Brennan et al	Connecting flux, deposition and resuspension in coastal debris surveys	2018	Murramarang National Park, Australia	-35.5791	150.356	1					1	1	1							1						M
2018	Brennan et al	Connecting flux, deposition and resuspension in coastal debris surveys	2018	Murramarang National Park, Australia	-35.5844	150.352	1					1	1	1							1						M
2018	Brennan et al	Connecting flux, deposition and resuspension in coastal debris surveys	2018	Murramarang National Park, Australia	-35.5881	150.347	1					1	1	1								1					M
2018	Brennan et al	Connecting flux, deposition and resuspension in coastal debris surveys	2018	Murramarang National Park, Australia	-35.5979	150.341	1					1	1	1								1					M
2018	Brennan et al	Connecting flux, deposition and resuspension in coastal debris surveys	2018	Murramarang National Park, Australia	-35.6018	150.343	1					1	1	1								1					M
2018	Brennan et al	Connecting flux, deposition and resuspension in coastal debris surveys	2018	Murramarang National Park, Australia	-35.6044	150.335	1					1	1	1								1					M
2002	Convey et al	Debris accumulation on oceanic island shores of the Scotia Arc, Antarctica	2002	Husvik Beach, South Georgia, Antarctica	-54.1795	-36.7109	1		1							1						1					M
2002	Convey et al	Debris accumulation on oceanic island shores of the Scotia Arc, Antarctica	2002	Demon Point, Candlemas Island, Antarctica	-57.0833	-26.7	1							1		1						1					M
2002	Convey et al	Debris accumulation on oceanic island shores of the Scotia Arc, Antarctica	2002	Ollivant Point, Saunders Island, Antarctica	-57.8	-26.5333	1		1							1						1					M
2002	Convey et al	Debris accumulation on oceanic island shores of the Scotia Arc, Antarctica	2002	Rothera Point, Adelaide Island, Antarctica	-67.5667	-68.1333	1							1		1						1					M
2018	Imhof et al	Variation in plastic abundance at different lake beach zones - A case study	2018	Santa Giulia, Lake Garda, Italy	45.4945	10.5127		1	1							1	1	1			1	1					F
2018	Imhof et al	Variation in plastic abundance at different lake beach zones - A case study	2018	Maderno, Lake Garda, Italy	45.632	10.6036		1	1							1	1	1			1	1					F
2018	Imhof et al	Variation in plastic abundance at different lake beach zones - A case study	2018	Nago-Torbole, Lake Garda, Italy	45.871	10.8717		1	1							1	1	1			1	1					F
2018	Imhof et al	Variation in plastic abundance at different lake beach zones - A case study	2018	Sirmione, Lake Garda, Italy	45.4613	10.6339		1	1							1	1	1			1	1					F
2018	Imhof et al	Variation in plastic abundance at different lake beach zones - A case study	2018	Bardolino, Lake Garda, Italy	45.5529	10.7179		1	1							1	1	1			1	1					F
2017	Willis et al	Differentiating littering, urban runoff and marine transport as sources of marine debris in coastal and estuarine environments	2017	Derwent Estuary, Tasmania	-43.2308	147.095	1		1							1	1						1				M/E
2017	Willis et al	Differentiating littering, urban runoff and marine transport as sources of marine debris in coastal and estuarine environments	2017	Derwent Estuary, Tasmania	-43.2468	147.133	1		1							1	1						1				M/E
2017	Willis et al	Differentiating littering, urban runoff and marine transport as sources of marine debris in coastal and estuarine environments	2017	Derwent Estuary, Tasmania	-43.2522	147.243	1		1							1	1						1				M/E
2017	Willis et al	Differentiating littering, urban runoff and marine transport as sources of marine debris in coastal and estuarine environments	2017	Derwent Estuary, Tasmania	-43.1441	147.247	1		1							1	1						1				M/E
2017	Willis et al	Differentiating littering, urban runoff and marine transport as sources of marine debris in coastal and estuarine environments	2017	Derwent Estuary, Tasmania	-43.1122	147.263	1		1							1	1						1				M/E
2017	Willis et al	Differentiating littering, urban runoff and marine transport as sources of marine debris in coastal and estuarine environments	2017	Derwent Estuary, Tasmania	-43.0119	147.28	1		1							1	1						1				M/E
2017	Willis et al	Differentiating littering, urban runoff and marine transport as sources of marine debris in coastal and estuarine environments	2017	Derwent Estuary, Tasmania	-43.0485	147.305	1		1							1	1						1				M/E
2017	Willis et al	Differentiating littering, urban runoff and marine transport as sources of marine debris in coastal and estuarine environments	2017	Derwent Estuary, Tasmania	-42.9652	147.34	1		1							1	1						1				M/E
2017	Willis et al	Differentiating littering, urban runoff and marine transport as sources of marine debris in coastal and estuarine environments	2017	Derwent Estuary, Tasmania	-42.9169	147.36	1		1							1	1						1				M/E
2017	Willis et al	Differentiating littering, urban runoff and marine transport as sources of marine debris in coastal and estuarine environments	2017	Derwent Estuary, Tasmania	-42.8525	147.357	1		1							1	1						1				M/E
2017	Willis et al	Differentiating littering, urban runoff and marine transport as sources of marine debris in coastal and estuarine environments	2017	Derwent Estuary, Tasmania	-42.8173	147.314	1		1							1	1						1				M/E
2017	Willis et al	Differentiating littering, urban runoff and marine transport as sources of marine debris in coastal and estuarine environments	2017	Derwent Estuary, Tasmania	-42.781	147.28	1		1							1	1						1				M/E
2017	Willis et al	Differentiating littering, urban runoff and marine transport as sources of marine debris in coastal and estuarine environments	2017	Derwent Estuary, Tasmania	-42.7911	147.259	1		1							1	1						1				M/E
2017	Willis et al	Differentiating littering, urban runoff and marine transport as sources of marine debris in coastal and estuarine environments	2017	Derwent Estuary, Tasmania	-42.7408	147.23	1		1							1	1						1				M/E
2017	Willis et al	Differentiating littering, urban runoff and marine transport as sources of marine debris in coastal and estuarine environments	2017	Derwent Estuary, Tasmania	-42.753	147.233	1		1							1	1						1				M/E
2017	Willis et al	Differentiating littering, urban runoff and marine transport as sources of marine debris in coastal and estuarine environments	2017	Derwent Estuary, Tasmania	-42.9755	147.399	1		1							1	1						1				M/E
2017	Willis et al	Differentiating littering, urban runoff and marine transport as sources of marine debris in coastal and estuarine environments	2017	Derwent Estuary, Tasmania	-43.0348	147.44	1		1							1	1						1				M/E
2017	Willis et al	Differentiating littering, urban runoff and marine transport as sources of marine debris in coastal and estuarine environments	2017	Derwent Estuary, Tasmania	-43.0227	147.494	1		1							1	1						1				M/E
2017	Willis et al	Differentiating littering, urban runoff and marine transport as sources of marine debris in coastal and estuarine environments	2017	Derwent Estuary, Tasmania	-42.9984	147.524	1		1							1	1						1				M/E
2017	Willis et al	Differentiating littering, urban runoff and marine transport as sources of marine debris in coastal and estuarine environments	2017	Derwent Estuary, Tasmania	-42.9673	147.452	1		1							1	1						1				M/E
2017	Willis et al	Differentiating littering, urban runoff and marine transport as sources of marine debris in coastal and estuarine environments	2017	Derwent Estuary, Tasmania	-42.909	147.435	1		1							1	1						1				M/E
2017	Willis et al	Differentiating littering, urban runoff and marine transport as sources of marine debris in coastal and estuarine environments	2017	Derwent Estuary, Tasmania	-42.8984	147.413	1		1							1	1						1				M/E
2017	Willis et al	Differentiating littering, urban runoff and marine transport as sources of marine debris in coastal and estuarine environments	2017	Derwent Estuary, Tasmania	-42.8531	147.518	1		1							1	1						1				M/E
2017	Willis et al	Differentiating littering, urban runoff and marine transport as sources of marine debris in coastal and estuarine environments	2017	Derwent Estuary, Tasmania	-42.8476	147.612	1		1							1	1						1				M/E
2017	Willis et al	Differentiating littering, urban runoff and marine transport as sources of marine debris in coastal and estuarine environments	2017	Derwent Estuary, Tasmania	-42.8959	147.791	1		1							1	1						1				M/E
2017	Willis et al	Differentiating littering, urban runoff and marine transport as sources of marine debris in coastal and estuarine environments	2017	Derwent Estuary, Tasmania	-42.9009	147.765	1		1							1	1						1				M/E
2017	Willis et al	Differentiating littering, urban runoff and marine transport as sources of marine debris in coastal and estuarine environments	2017	East Coast, Tasmania	-42.5294	147.928	1		1							1	1						1				M/E
2017	Willis et al	Differentiating littering, urban runoff and marine transport as sources of marine debris in coastal and estuarine environments	2017	East Coast, Tasmania	-42.3109	147.996	1		1							1	1						1				M/E
2017	Willis et al	Differentiating littering, urban runoff and marine transport as sources of marine debris in coastal and estuarine environments	2017	East Coast, Tasmania	-42.1672	148.081	1		1							1	1						1				M/E
2017	Willis et al	Differentiating littering, urban runoff and marine transport as sources of marine debris in coastal and estuarine environments	2017	East Coast, Tasmania	-42.0989	148.234	1		1							1	1						1				M/E
2017	Willis et al	Differentiating littering, urban runoff and marine transport as sources of marine debris in coastal and estuarine environments	2017	East Coast, Tasmania	-42.1355	148.318	1		1							1	1						1				M/E
2017	Willis et al	Differentiating littering, urban runoff and marine transport as sources of marine debris in coastal and estuarine environments	2017	East Coast, Tasmania	-41.9937	148.286	1		1							1	1						1				M/E
2017	Willis et al	Differentiating littering, urban runoff and marine transport as sources of marine debris in coastal and estuarine environments	2017	East Coast, Tasmania	-41.7835	148.27	1		1							1	1						1				M/E
2017	Willis et al	Differentiating littering, urban runoff and marine transport as sources of marine debris in coastal and estuarine environments	2017	East Coast, Tasmania	-41.5508	148.285	1		1							1	1						1				M/E
2017	Willis et al	Differentiating littering, urban runoff and marine transport as sources of marine debris in coastal and estuarine environments	2017	East Coast, Tasmania	-41.3231	148.318	1		1							1	1						1				M/E
2017	Willis et al	Differentiating littering, urban runoff and marine transport as sources of marine debris in coastal and estuarine environments	2017	East Coast, Tasmania	-41.1674	148.281	1		1							1	1						1				M/E
2017	Willis et al	Differentiating littering, urban runoff and marine transport as sources of marine debris in coastal and estuarine environments	2017	East Coast, Tasmania	-40.9808	148.317	1		1							1	1						1				M/E
2017	Willis et al	Differentiating littering, urban runoff and marine transport as sources of marine debris in coastal and estuarine environments	2017	East Coast, Tasmania	-40.8252	148.179	1		1							1	1						1				M/E
2017	Willis et al	Differentiating littering, urban runoff and marine transport as sources of marine debris in coastal and estuarine environments	2017	Tamar Estuary, Tasmania	-40.8648	147.59	1		1							1	1						1				M/E
2017	Willis et al	Differentiating littering, urban runoff and marine transport as sources of marine debris in coastal and estuarine environments	2017	Tamar Estuary, Tasmania	-41.0029	147.441	1		1							1	1						1				M/E
2017	Willis et al	Differentiating littering, urban runoff and marine transport as sources of marine debris in coastal and estuarine environments	2017	Tamar Estuary, Tasmania	-40.9667	147.355	1		1							1	1						1				M/E
2017	Willis et al	Differentiating littering, urban runoff and marine transport as sources of marine debris in coastal and estuarine environments	2017	Tamar Estuary, Tasmania	-41.0002	147.199	1		1							1	1						1				M/E
2017	Willis et al	Differentiating littering, urban runoff and marine transport as sources of marine debris in coastal and estuarine environments	2017	Tamar Estuary, Tasmania	-40.9979	147.07	1		1							1	1						1				M/E
2017	Willis et al	Differentiating littering, urban runoff and marine transport as sources of marine debris in coastal and estuarine environments	2017	Tamar Estuary, Tasmania	-41.0255	146.949	1		1							1	1						1				M/E
2017	Willis et al	Differentiating littering, urban runoff and marine transport as sources of marine debris in coastal and estuarine environments	2017	Tamar Estuary, Tasmania	-41.0499	146.824	1		1							1	1						1				M/E
2017	Willis et al	Differentiating littering, urban runoff and marine transport as sources of marine debris in coastal and estuarine environments	2017	Tamar Estuary, Tasmania	-41.0886	146.782	1		1							1	1						1				M/E
2017	Willis et al	Differentiating littering, urban runoff and marine transport as sources of marine debris in coastal and estuarine environments	2017	Tamar Estuary, Tasmania	-41.0901	146.814	1		1							1	1						1				M/E
2017	Willis et al	Differentiating littering, urban runoff and marine transport as sources of marine debris in coastal and estuarine environments	2017	Tamar Estuary, Tasmania	-41.1469	146.802	1		1							1	1						1				M/E
2017	Willis et al	Differentiating littering, urban runoff and marine transport as sources of marine debris in coastal and estuarine environments	2017	Tamar Estuary, Tasmania	-41.1452	146.815	1		1							1	1						1				M/E
2017	Willis et al	Differentiating littering, urban runoff and marine transport as sources of marine debris in coastal and estuarine environments	2017	Tamar Estuary, Tasmania	-41.1309	146.875	1		1							1	1						1				M/E
2017	Willis et al	Differentiating littering, urban runoff and marine transport as sources of marine debris in coastal and estuarine environments	2017	Tamar Estuary, Tasmania	-41.1783	146.928	1		1							1	1						1				M/E
2017	Willis et al	Differentiating littering, urban runoff and marine transport as sources of marine debris in coastal and estuarine environments	2017	Tamar Estuary, Tasmania	-41.2002	146.898	1		1							1	1						1				M/E
2017	Willis et al	Differentiating littering, urban runoff and marine transport as sources of marine debris in coastal and estuarine environments	2017	Tamar Estuary, Tasmania	-41.1832	146.955	1		1							1	1						1				M/E
2017	Willis et al	Differentiating littering, urban runoff and marine transport as sources of marine debris in coastal and estuarine environments	2017	Tamar Estuary, Tasmania	-41.2291	146.946	1		1							1	1						1				M/E
2017	Willis et al	Differentiating littering, urban runoff and marine transport as sources of marine debris in coastal and estuarine environments	2017	Tamar Estuary, Tasmania	-41.2806	147.014	1		1							1	1						1				M/E
2017	Willis et al	Differentiating littering, urban runoff and marine transport as sources of marine debris in coastal and estuarine environments	2017	Tamar Estuary, Tasmania	-41.2945	146.972	1		1							1	1						1				M/E
2017	Willis et al	Differentiating littering, urban runoff and marine transport as sources of marine debris in coastal and estuarine environments	2017	Tamar Estuary, Tasmania	-41.3418	147.025	1		1							1	1						1				M/E
2017	Willis et al	Differentiating littering, urban runoff and marine transport as sources of marine debris in coastal and estuarine environments	2017	Tamar Estuary, Tasmania	-41.3393	147.056	1		1							1	1						1				M/E
2017	Willis et al	Differentiating littering, urban runoff and marine transport as sources of marine debris in coastal and estuarine environments	2017	Tamar Estuary, Tasmania	-41.3896	147.078	1		1							1	1						1				M/E
2017	Willis et al	Differentiating littering, urban runoff and marine transport as sources of marine debris in coastal and estuarine environments	2017	Tamar Estuary, Tasmania	-41.3862	147.095	1		1							1	1						1				M/E
2017	Willis et al	Differentiating littering, urban runoff and marine transport as sources of marine debris in coastal and estuarine environments	2017	Tamar Estuary, Tasmania	-41.0847	146.747	1		1							1	1						1				M/E
2017	Willis et al	Differentiating littering, urban runoff and marine transport as sources of marine debris in coastal and estuarine environments	2017	Tamar Estuary, Tasmania	-41.1439	146.598	1		1							1	1						1				M/E
2017	Willis et al	Differentiating littering, urban runoff and marine transport as sources of marine debris in coastal and estuarine environments	2017	Tamar Estuary, Tasmania	-41.1601	146.549	1		1							1	1						1				M/E
2017	Willis et al	Differentiating littering, urban runoff and marine transport as sources of marine debris in coastal and estuarine environments	2017	Tamar Estuary, Tasmania	-41.1715	146.402	1		1							1	1						1				M/E
2017	Willis et al	Differentiating littering, urban runoff and marine transport as sources of marine debris in coastal and estuarine environments	2017	Tamar Estuary, Tasmania	-41.1606	146.355	1		1							1	1						1				M/E
2017	Willis et al	Differentiating littering, urban runoff and marine transport as sources of marine debris in coastal and estuarine environments	2017	Tamar Estuary, Tasmania	-41.1521	146.17	1		1							1	1						1				M/E
2017	Willis et al	Differentiating littering, urban runoff and marine transport as sources of marine debris in coastal and estuarine environments	2017	Tamar Estuary, Tasmania	-41.1378	146.14	1		1							1	1						1				M/E
2017	Vincent et al	Citizen science datasets reveal drivers of spatial and temporal variation for anthropogenic litter on Great Lakes beaches	2017	Chicago, Illinois, USA	41.8933	-87.6127	1				0.75	1		1									1				F
2017	Vincent et al	Citizen science datasets reveal drivers of spatial and temporal variation for anthropogenic litter on Great Lakes beaches	2017	Waukegan, Illinois, USA	42.3626	-87.8172	1				0.75	1		1									1				F
2017	Vincent et al	Citizen science datasets reveal drivers of spatial and temporal variation for anthropogenic litter on Great Lakes beaches	2017	Fort Sheridan, Highland Park, Illinois, USA	42.2076	-87.8008	1				0.75	1		1									1				F
2017	Vincent et al	Citizen science datasets reveal drivers of spatial and temporal variation for anthropogenic litter on Great Lakes beaches	2017	Openlands, Highland Park, Illinois, USA	42.2167	-87.8045	1				0.75	1		1									1				F
2017	Vincent et al	Citizen science datasets reveal drivers of spatial and temporal variation for anthropogenic litter on Great Lakes beaches	2017	Erie Basin Marina, Buffalo, New York, USA	42.8814	-78.8888	1				0.75	1		1									1				F
2017	Vincent et al	Citizen science datasets reveal drivers of spatial and temporal variation for anthropogenic litter on Great Lakes beaches	2017	Hamburg, New York, USA	42.7653	-78.8772	1				0.75	1		1									1				F
2017	Vincent et al	Citizen science datasets reveal drivers of spatial and temporal variation for anthropogenic litter on Great Lakes beaches	2017	Woodlawn, Blasdell, New York, USA	42.7891	-78.8529	1				0.75	1		1									1				F
2017	Vincent et al	Citizen science datasets reveal drivers of spatial and temporal variation for anthropogenic litter on Great Lakes beaches	2017	Beaver Island, Grand Island, New York, USA	42.9595	-78.95	1				0.75	1		1									1				F
2017	Vincent et al	Citizen science datasets reveal drivers of spatial and temporal variation for anthropogenic litter on Great Lakes beaches	2017	Golden Hill, Barker, New York, USA	43.373	-78.4885	1				0.75	1		1									1				F
2001	Williams and Tudor	Temporal trends in litter dynamics at a pebble pocket beach	2001	Tresilian Beach, Wales	51.3988	-3.5142	1			1		1		1								1					M
2012	Smith	Marine debris: A proximate threat to marine sustainability in Bootless Bay, Papua New Guinea	2012	Motupore Island, Papua New Guinea	-9.52368	147.285	1		1																1		M
2016	Zhou et al	Assessment of marine debris in beaches or seawaters around the China Seas and coastal provinces	2016	Yalongwan Beach, Sanya City, China	18.2	109.5	1		1															1			M
2016	Zhou et al	Assessment of marine debris in beaches or seawaters around the China Seas and coastal provinces	2016	Jiari Beach, Haikou City, China	20.05	110.17	1		1															1			M
2016	Zhou et al	Assessment of marine debris in beaches or seawaters around the China Seas and coastal provinces	2016	Jintan Beach, Fangchenggang City, China	21.78	108.35	1		1															1			M
2016	Zhou et al	Assessment of marine debris in beaches or seawaters around the China Seas and coastal provinces	2016	Yintan Beach, Beihai City, China	21.48	109.12	1		1															1			M
2016	Zhou et al	Assessment of marine debris in beaches or seawaters around the China Seas and coastal provinces	2016	Donghaidao Beach, Zhanjiang City, China	21.18	110.4	1		1															1			M
2016	Zhou et al	Assessment of marine debris in beaches or seawaters around the China Seas and coastal provinces	2016	Zhapo Beach, Yangjiang City, China	21.85	111.95	1		1															1			M
2016	Zhou et al	Assessment of marine debris in beaches or seawaters around the China Seas and coastal provinces	2016	Feishatan Beach, Jiangmen City, China	21.33	113.07	1		1															1			M
2016	Zhou et al	Assessment of marine debris in beaches or seawaters around the China Seas and coastal provinces	2016	Meisha Beach, Shenzhen City, China	22.62	114.07	1		1															1			M
2016	Zhou et al	Assessment of marine debris in beaches or seawaters around the China Seas and coastal provinces	2016	Honghaiwan Beach, Shanwei City, China	22.78	115.37	1		1															1			M
2016	Zhou et al	Assessment of marine debris in beaches or seawaters around the China Seas and coastal provinces	2016	Malaunwan Beach, Dongshan City, China	23.72	117.4	1		1															1			M
2016	Zhou et al	Assessment of marine debris in beaches or seawaters around the China Seas and coastal provinces	2016	Huangcuo Beach, Xiamen City, China	24.47	118.1	1		1															1			M
2016	Zhou et al	Assessment of marine debris in beaches or seawaters around the China Seas and coastal provinces	2016	Longwangtou Beach, Pingtan City, China	25.52	119.78	1		1															1			M
2016	Zhou et al	Assessment of marine debris in beaches or seawaters around the China Seas and coastal provinces	2016	Dasaao Beach, Wenzhou City, China	28	120.7	1		1															1			M
2016	Zhou et al	Assessment of marine debris in beaches or seawaters around the China Seas and coastal provinces	2016	Zhujiajian Beach, Zhoushan City, China	29.97	122.3	1		1															1			M
2016	Zhou et al	Assessment of marine debris in beaches or seawaters around the China Seas and coastal provinces	2016	Liandao Beach, Lianyungang City, China	34.58	1119.17	1		1															1			M
2016	Zhou et al	Assessment of marine debris in beaches or seawaters around the China Seas and coastal provinces	2016	Wanpingkou Beach, Rizhao City, China	35.23	119.32	1		1															1			M
2016	Zhou et al	Assessment of marine debris in beaches or seawaters around the China Seas and coastal provinces	2016	Diyi Beach, Qingdao City, China	36.03	120.18	1		1															1			M
2016	Zhou et al	Assessment of marine debris in beaches or seawaters around the China Seas and coastal provinces	2016	Guoji Beach, Weihai City, China	37.5	122.1	1		1															1			M
2016	Zhou et al	Assessment of marine debris in beaches or seawaters around the China Seas and coastal provinces	2016	Jinshatan Beach, Yantai City, China	37.52	121.38	1		1															1			M
2016	Zhou et al	Assessment of marine debris in beaches or seawaters around the China Seas and coastal provinces	2016	Penglaige Beach, Penglai City, China	37.8	120.75	1		1															1			M
2016	Zhou et al	Assessment of marine debris in beaches or seawaters around the China Seas and coastal provinces	2016	Laohushi Beach, Beidaihe City, China	40.45	119.48	1		1															1			M
2016	Zhou et al	Assessment of marine debris in beaches or seawaters around the China Seas and coastal provinces	2016	Suizhong Beach, Huludao City, China	40.45	120.51	1		1															1			M
2016	Zhou et al	Assessment of marine debris in beaches or seawaters around the China Seas and coastal provinces	2016	Jinshitna Beach, Dalian City, China	39.03	121.8	1		1															1			M
2017	Nelms et al	Marine anthropogenic litter on British beaches: A 10-year nationwide assessment using citizen science data	2017	UK (England, Scotland Wales)			1			1				1		1								1			M
2016	Blickley et al	Trends and drivers of debris accumulation on Maui shorelines: Implications for local mitigation strategies	2016	Pu'unoa Beach, Maui, Hawaii	20.8842	-150.687	1			1	1	1	1	1										1			M
2016	Blickley et al	Trends and drivers of debris accumulation on Maui shorelines: Implications for local mitigation strategies	2016	Po'olenalena Beach, Maui, Hawaii	20.6631	-156.442	1			1	1	1	1	1										1			M
[truncated: 1,285 more rows]

## Sheet: MetaData
This workbook contains all raw data from a systematic literature review for all English-language shorelines studies published in peer reviewed venues between 1977 and 2019. We defined a shoreline survey as any original research study that collected count or concentration data in the field for anthropogenic debris, including plastics (of any size), on a marine or freshwater shoreline.
[truncated: 60 more rows]
